# Supplementary material
Source: ML conference proceedings conference paper supplement (https://openreview.net/forum?id=zV2cgXk2aY)

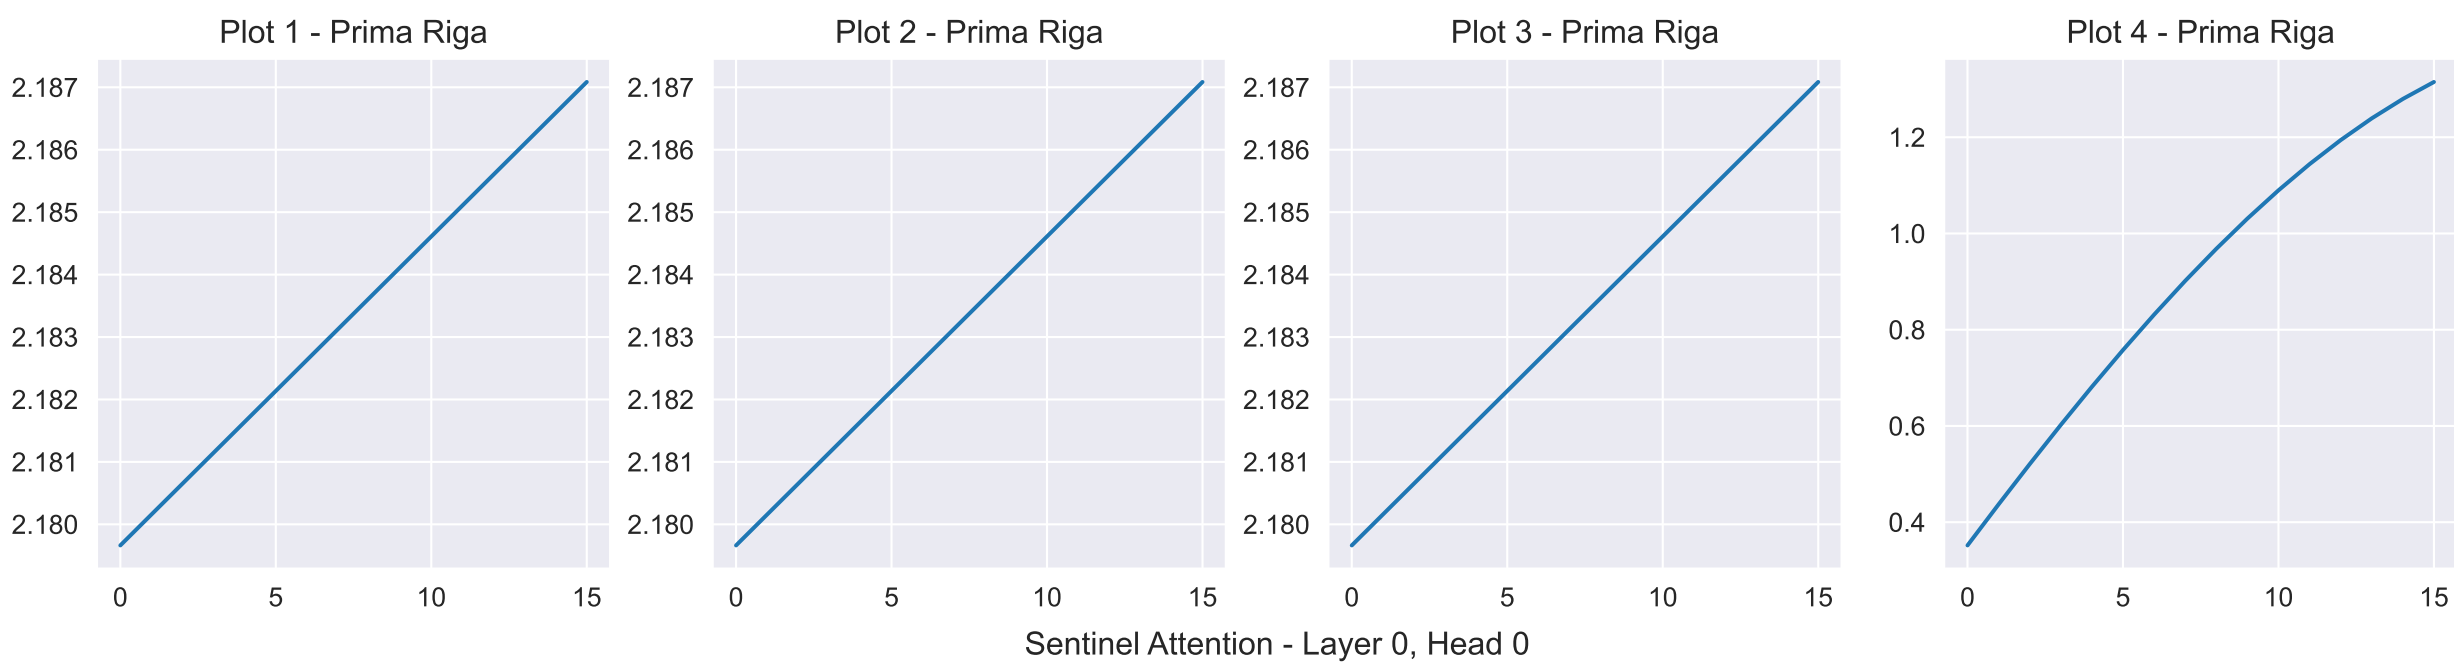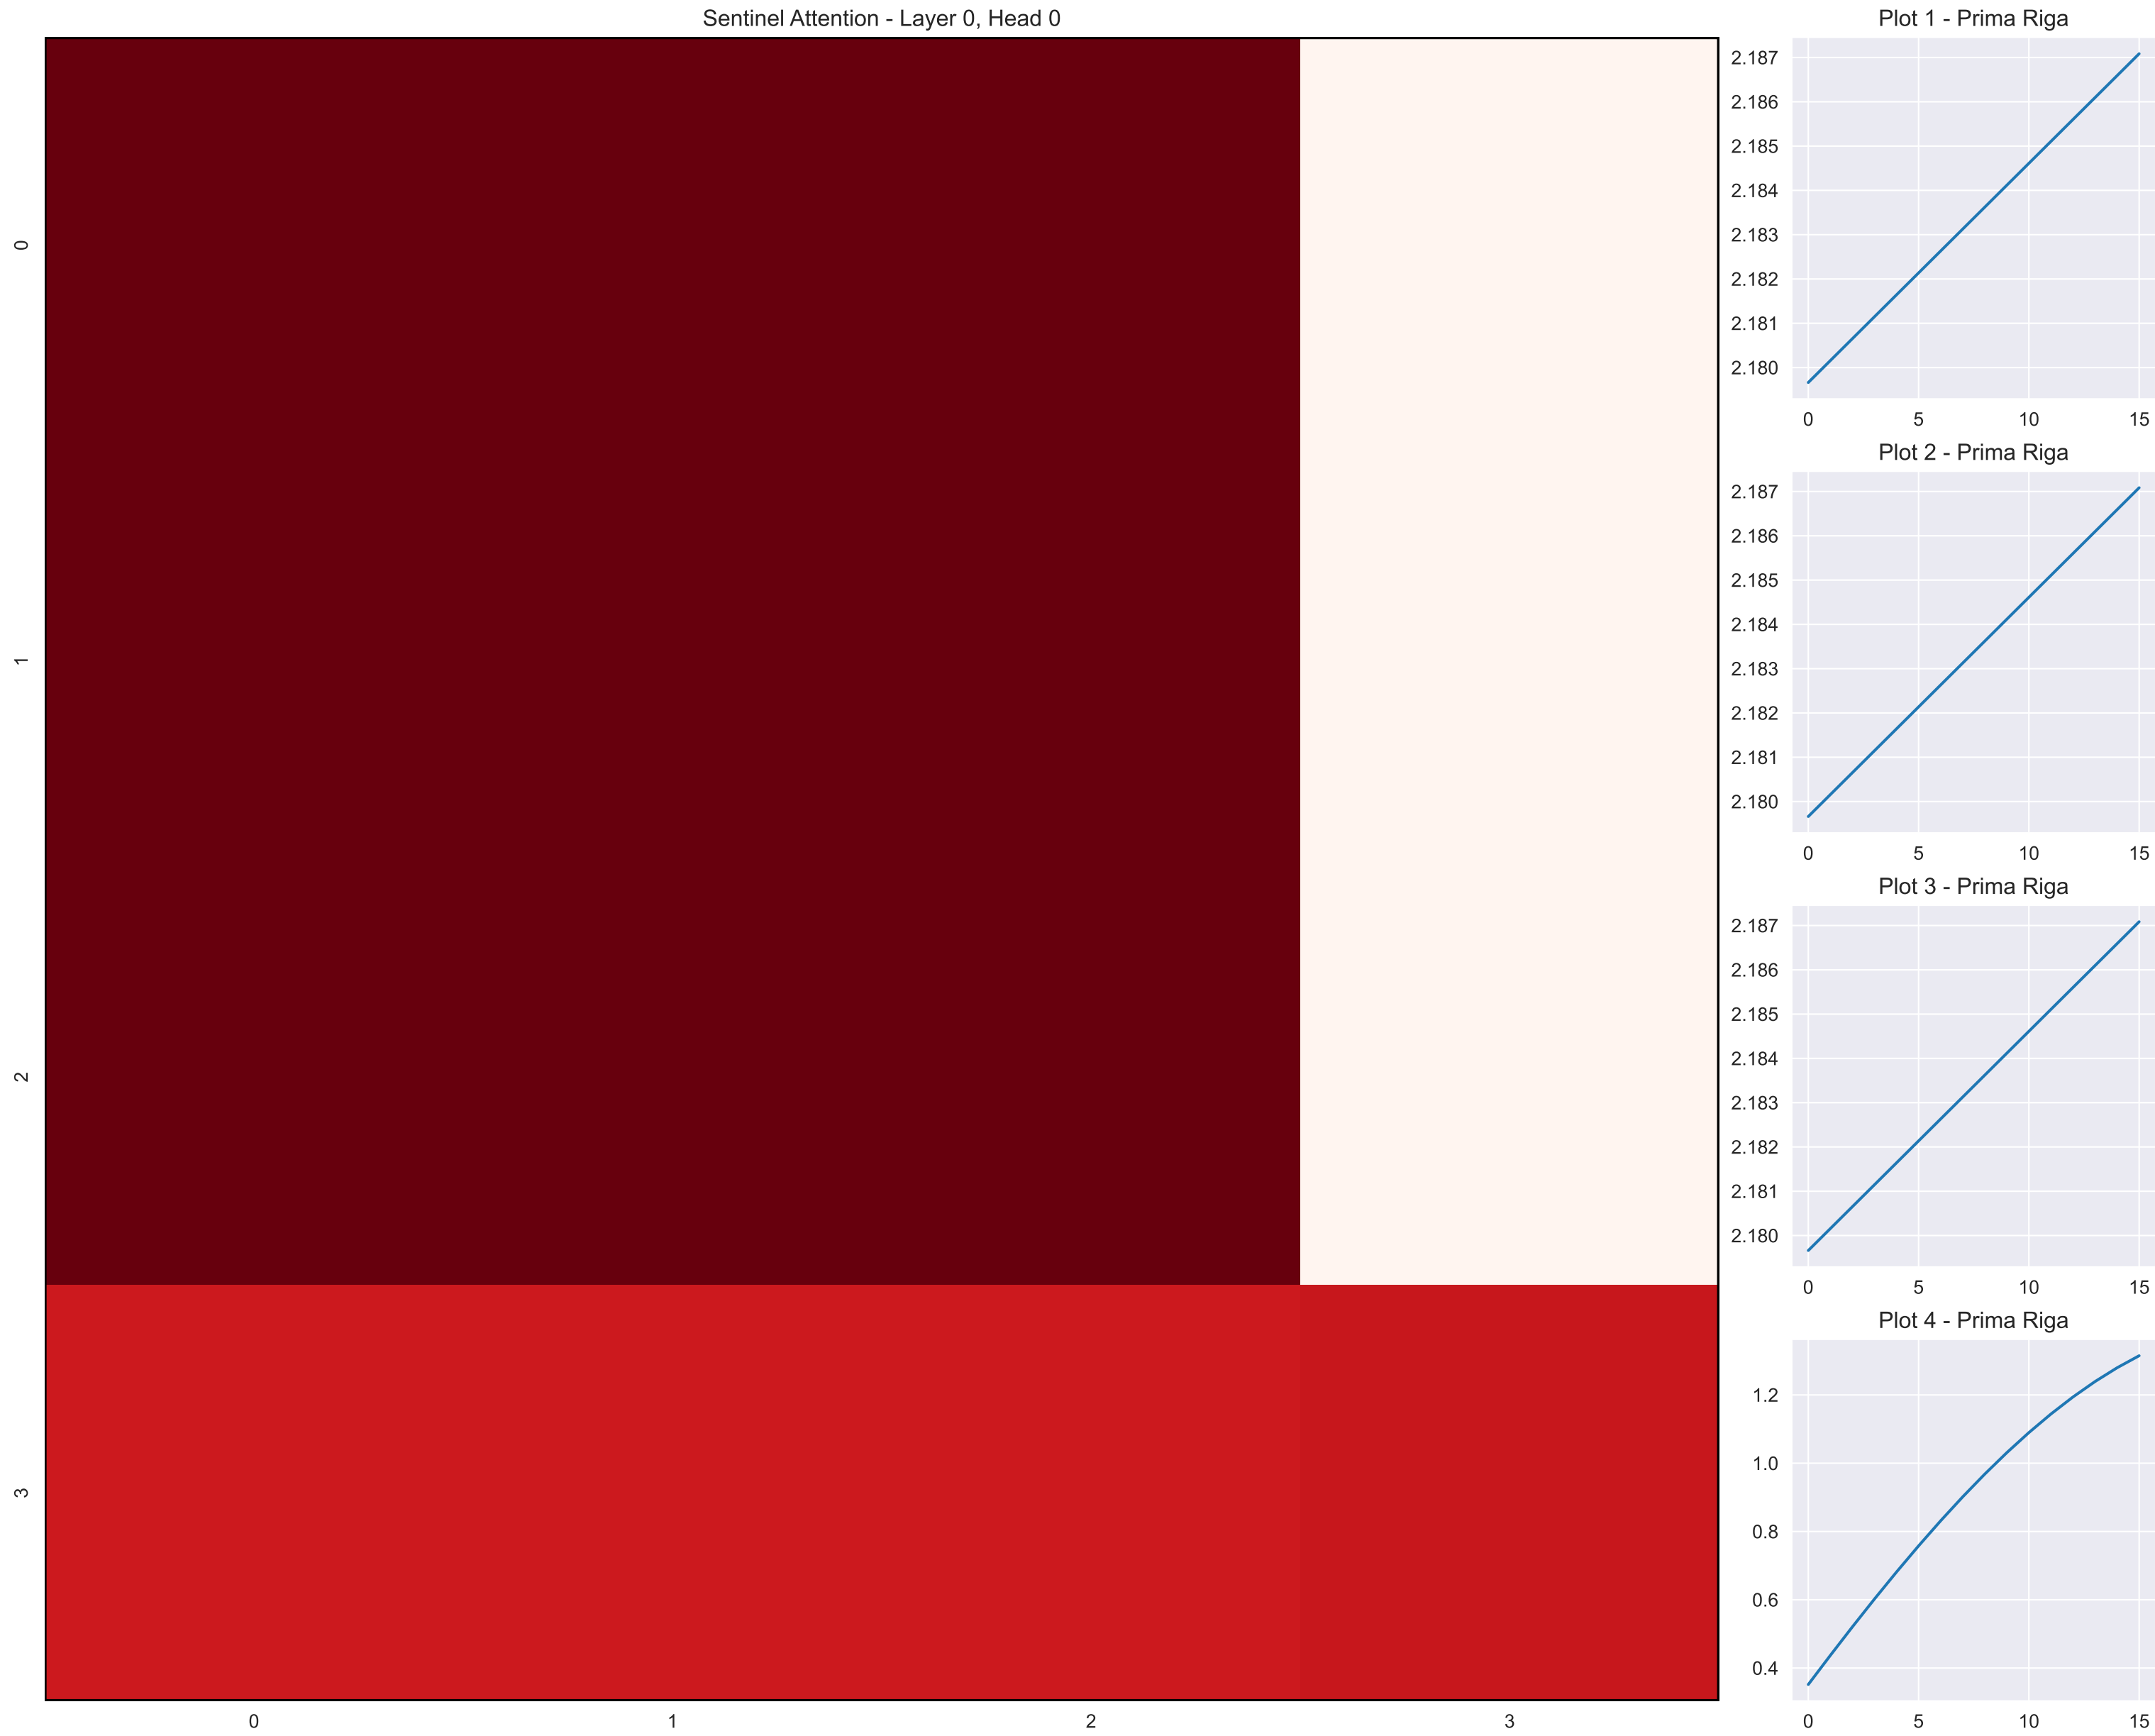

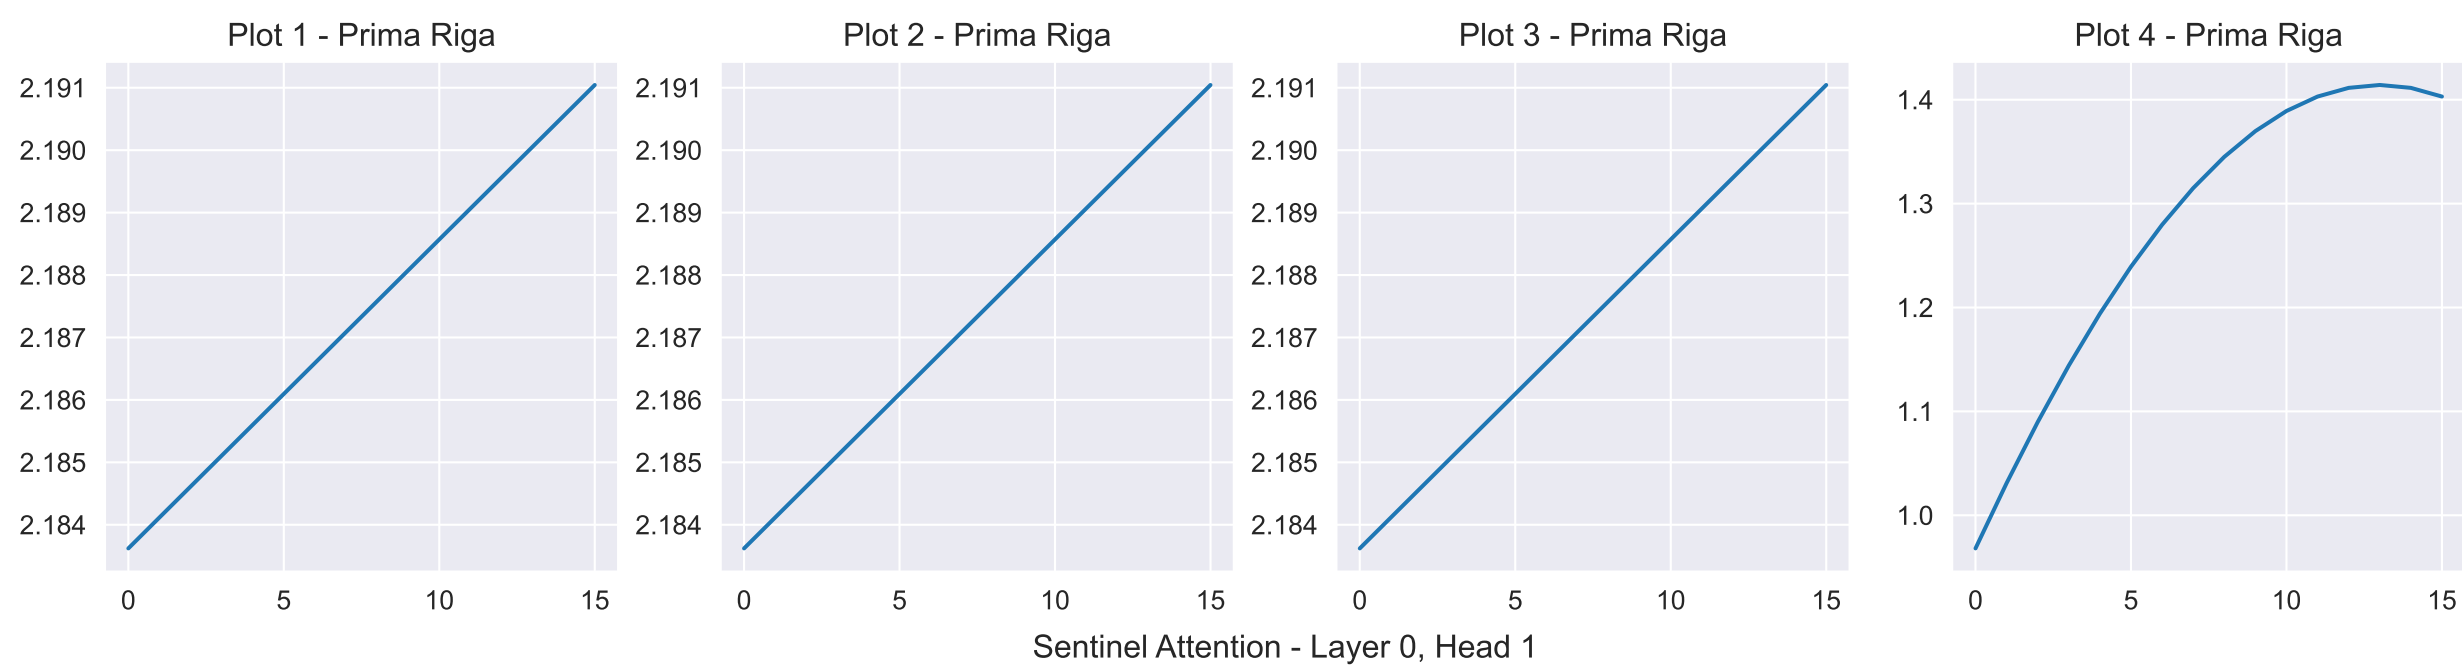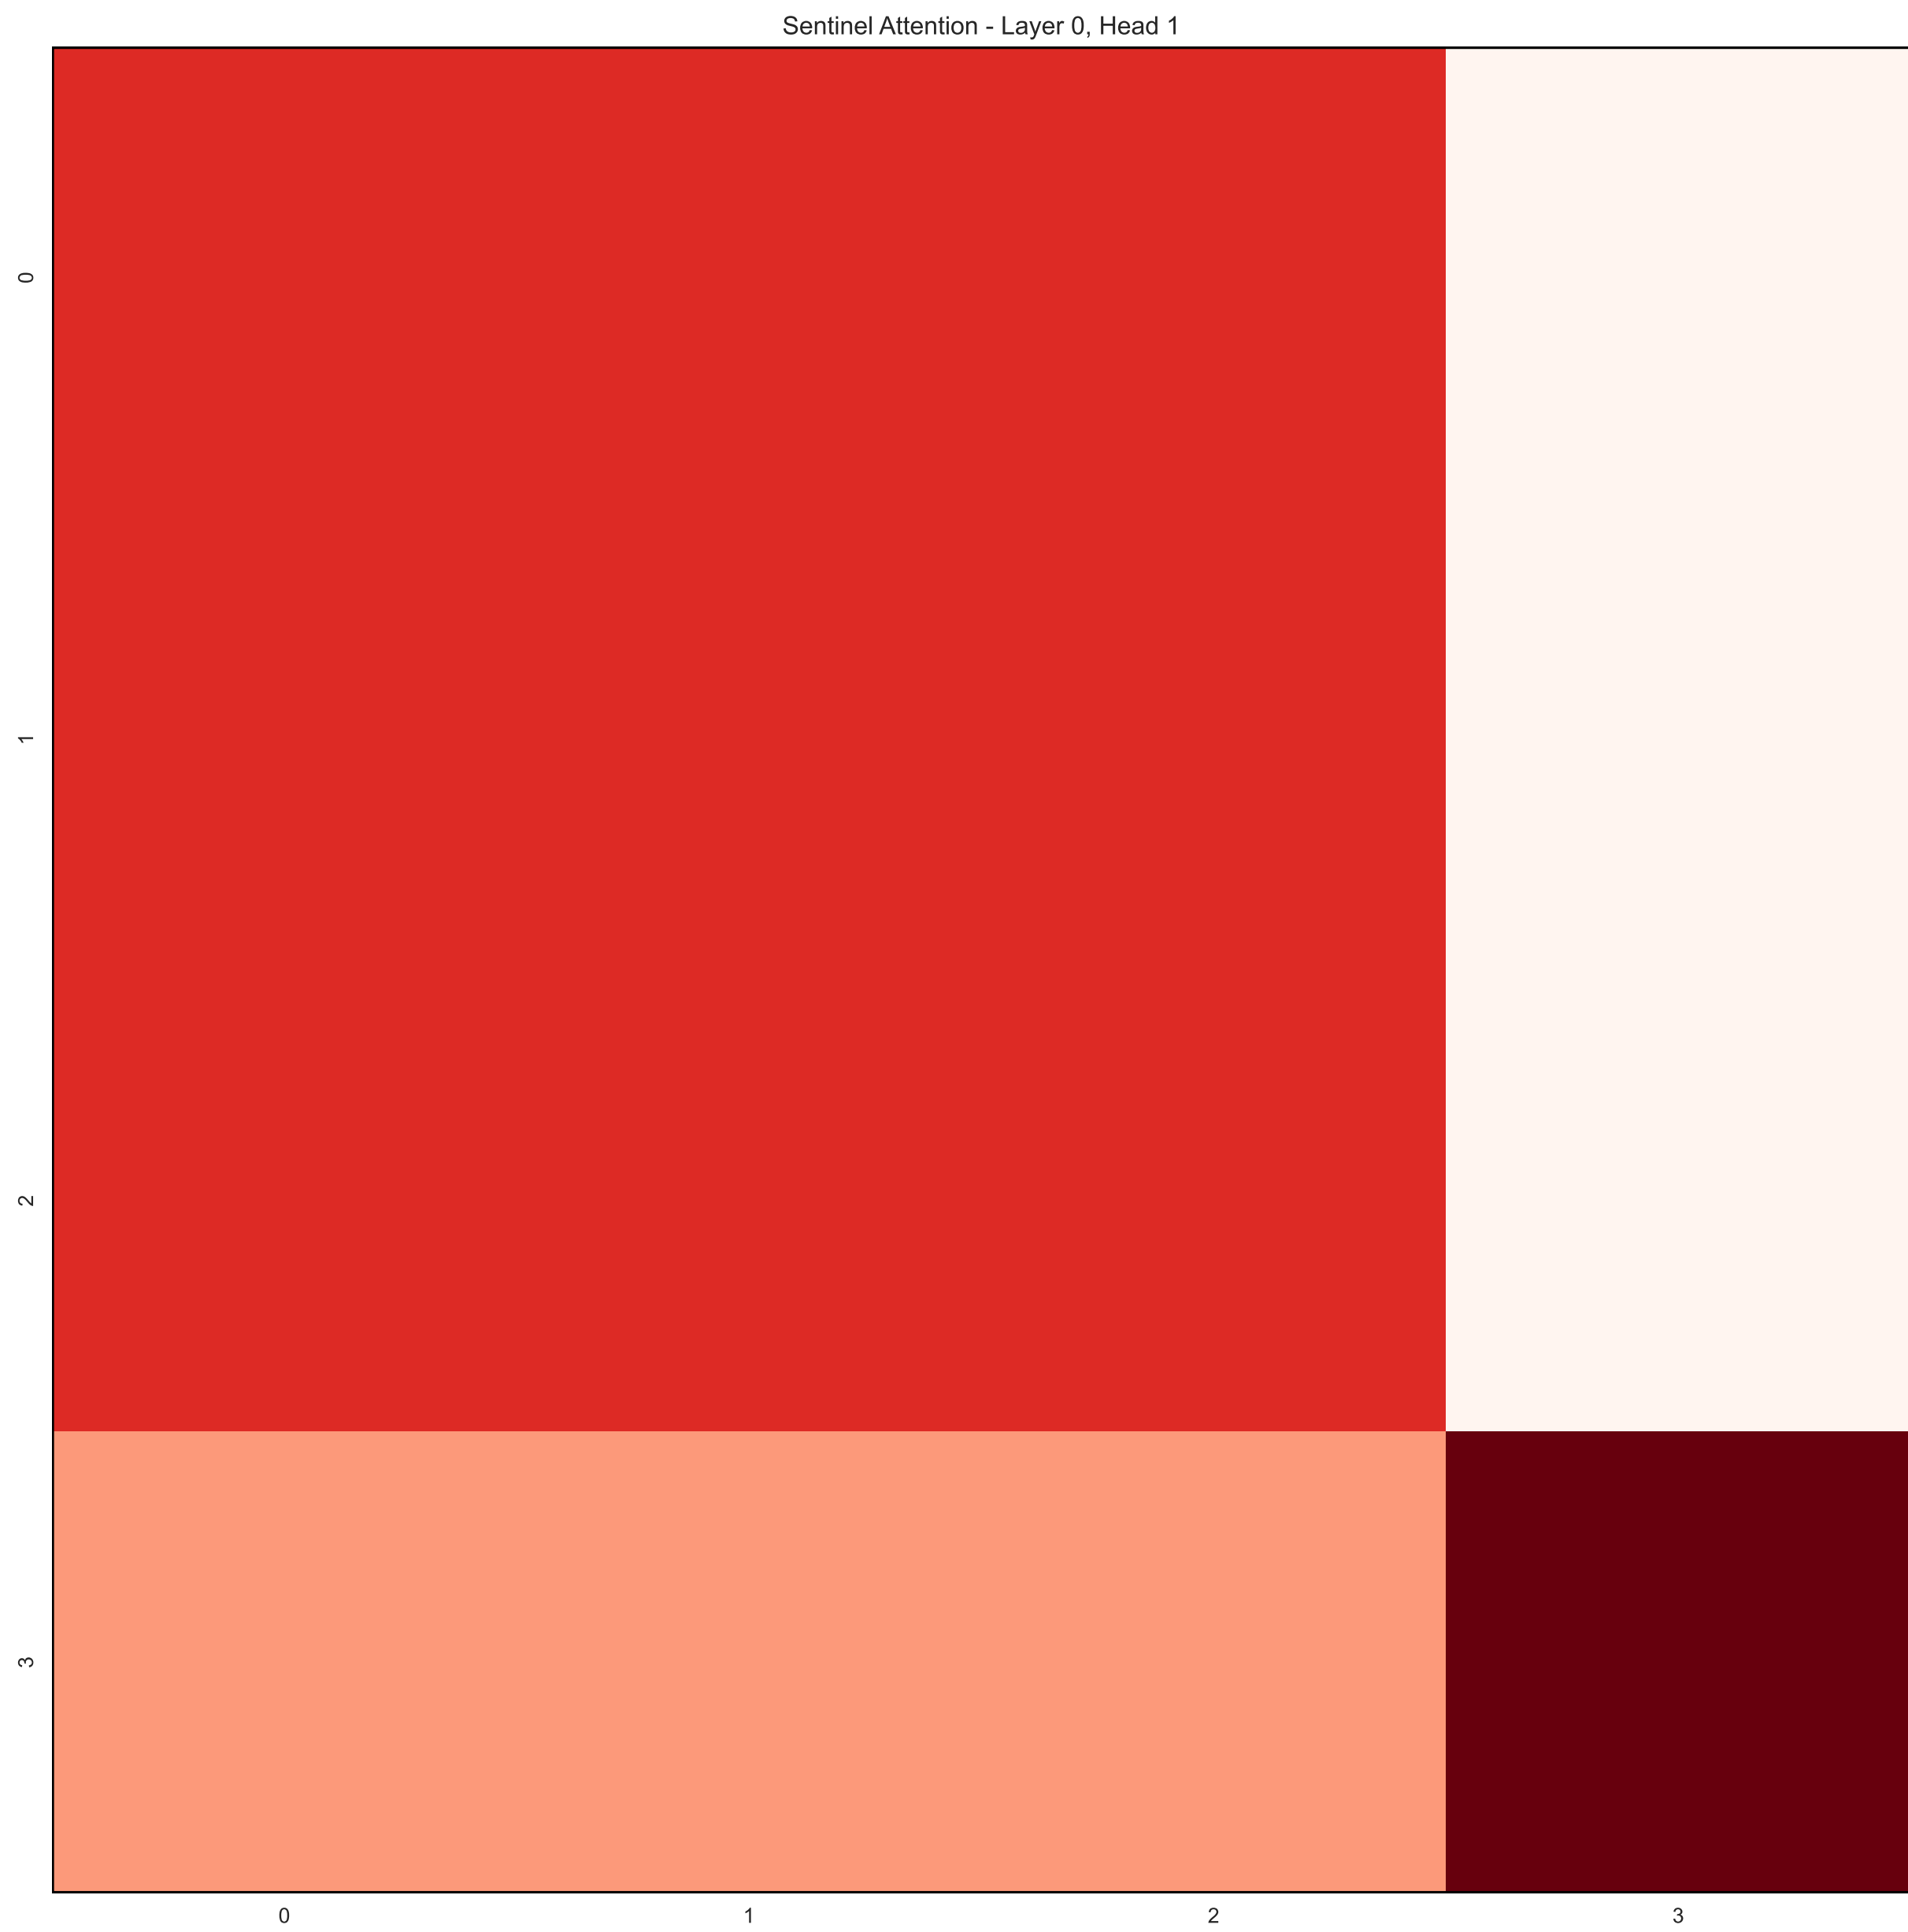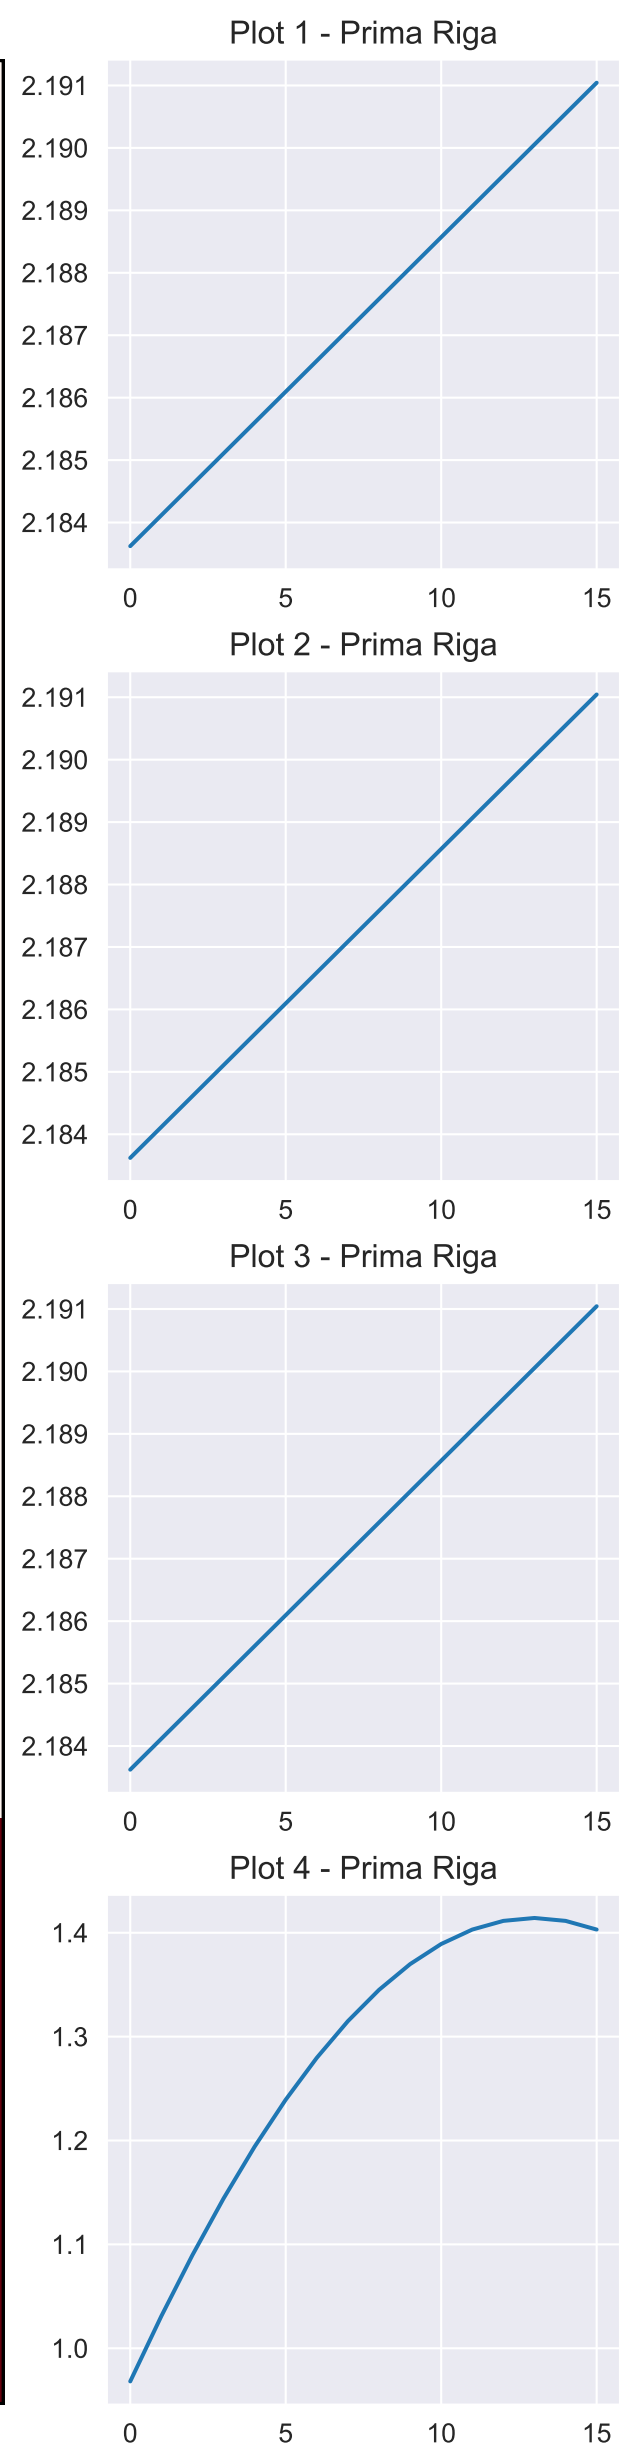

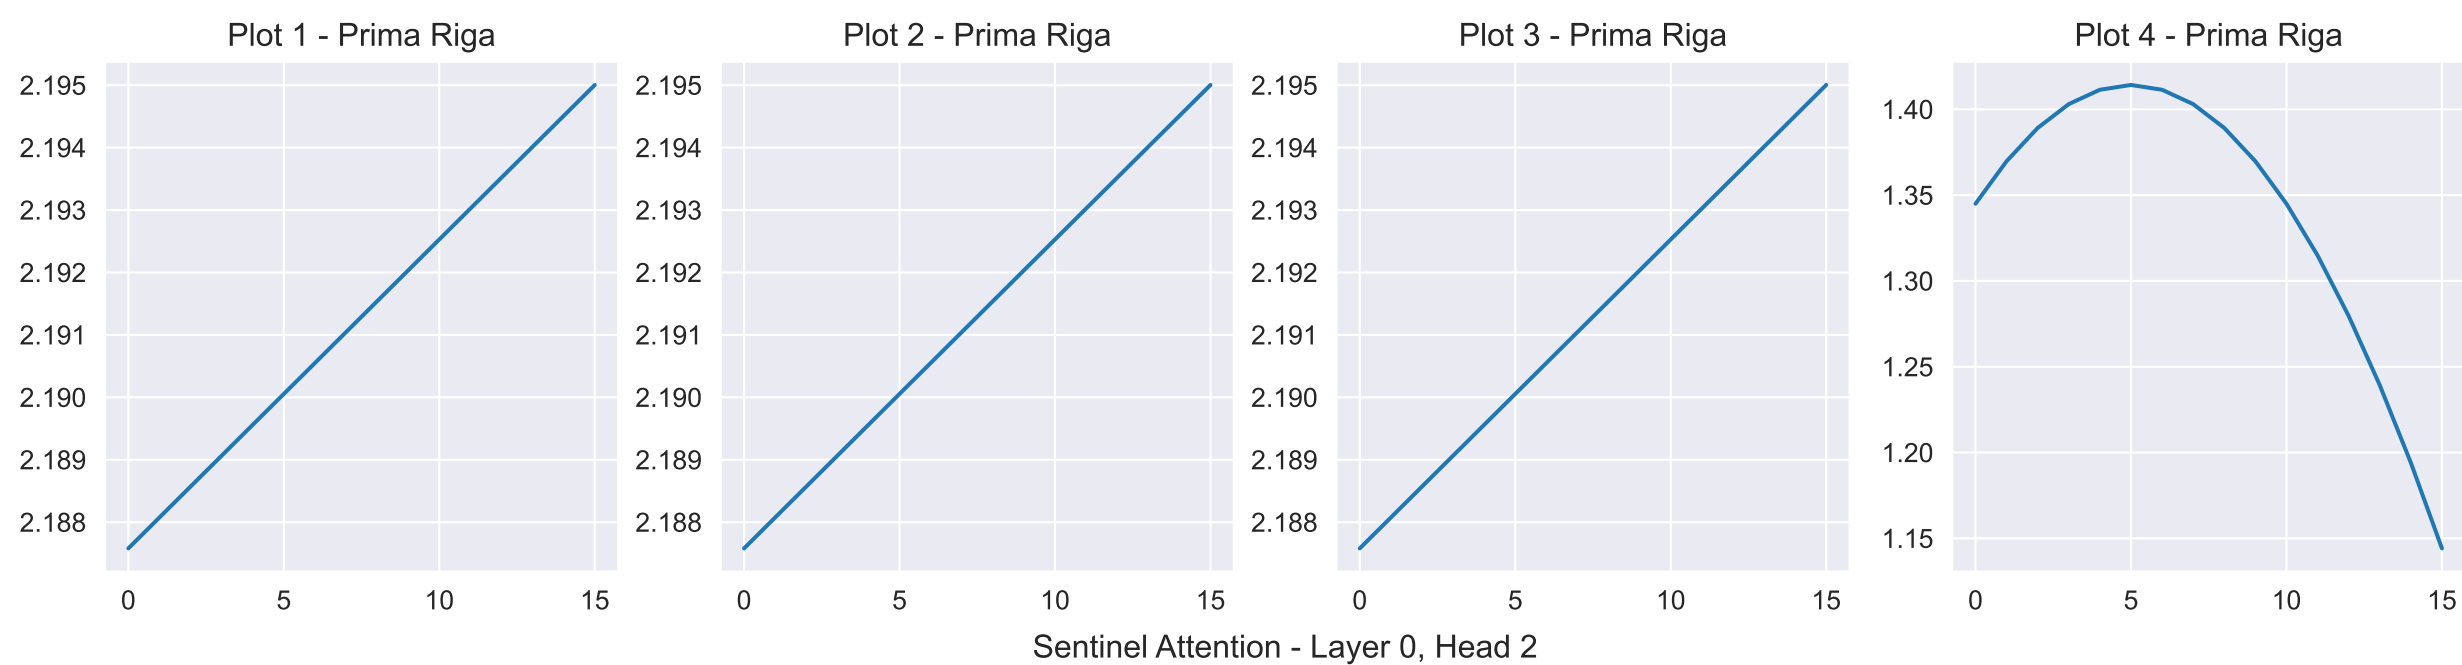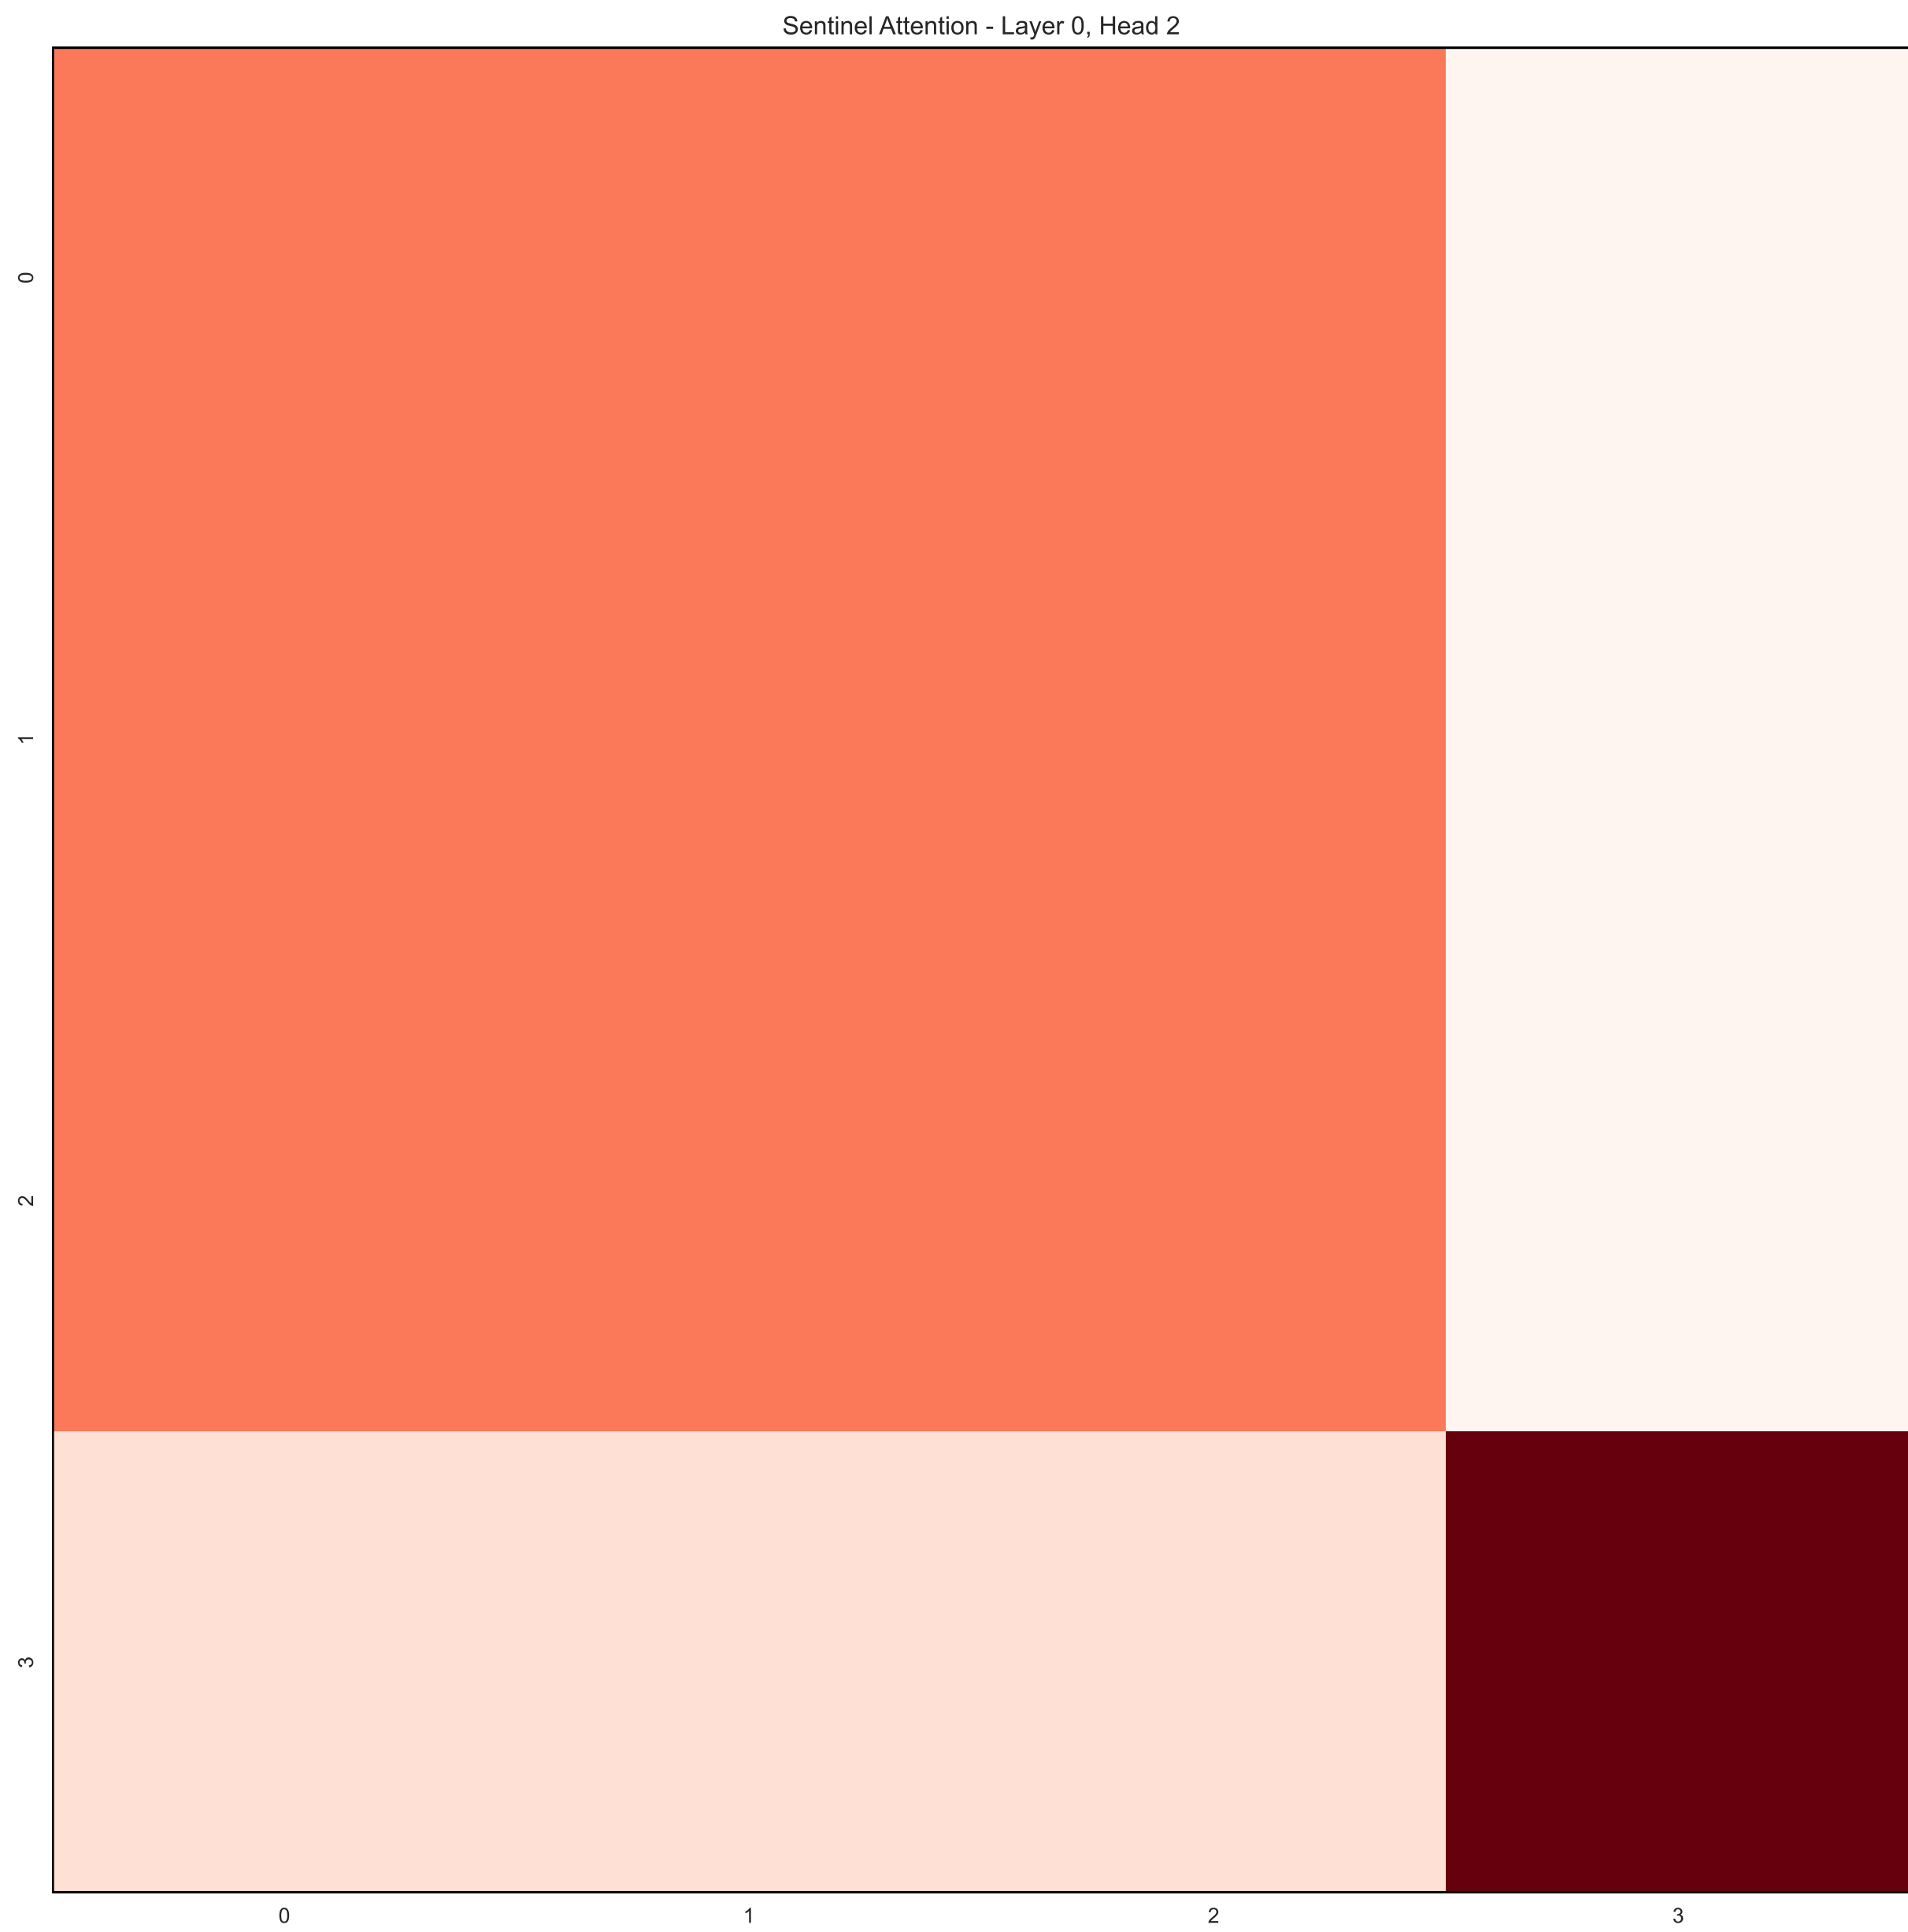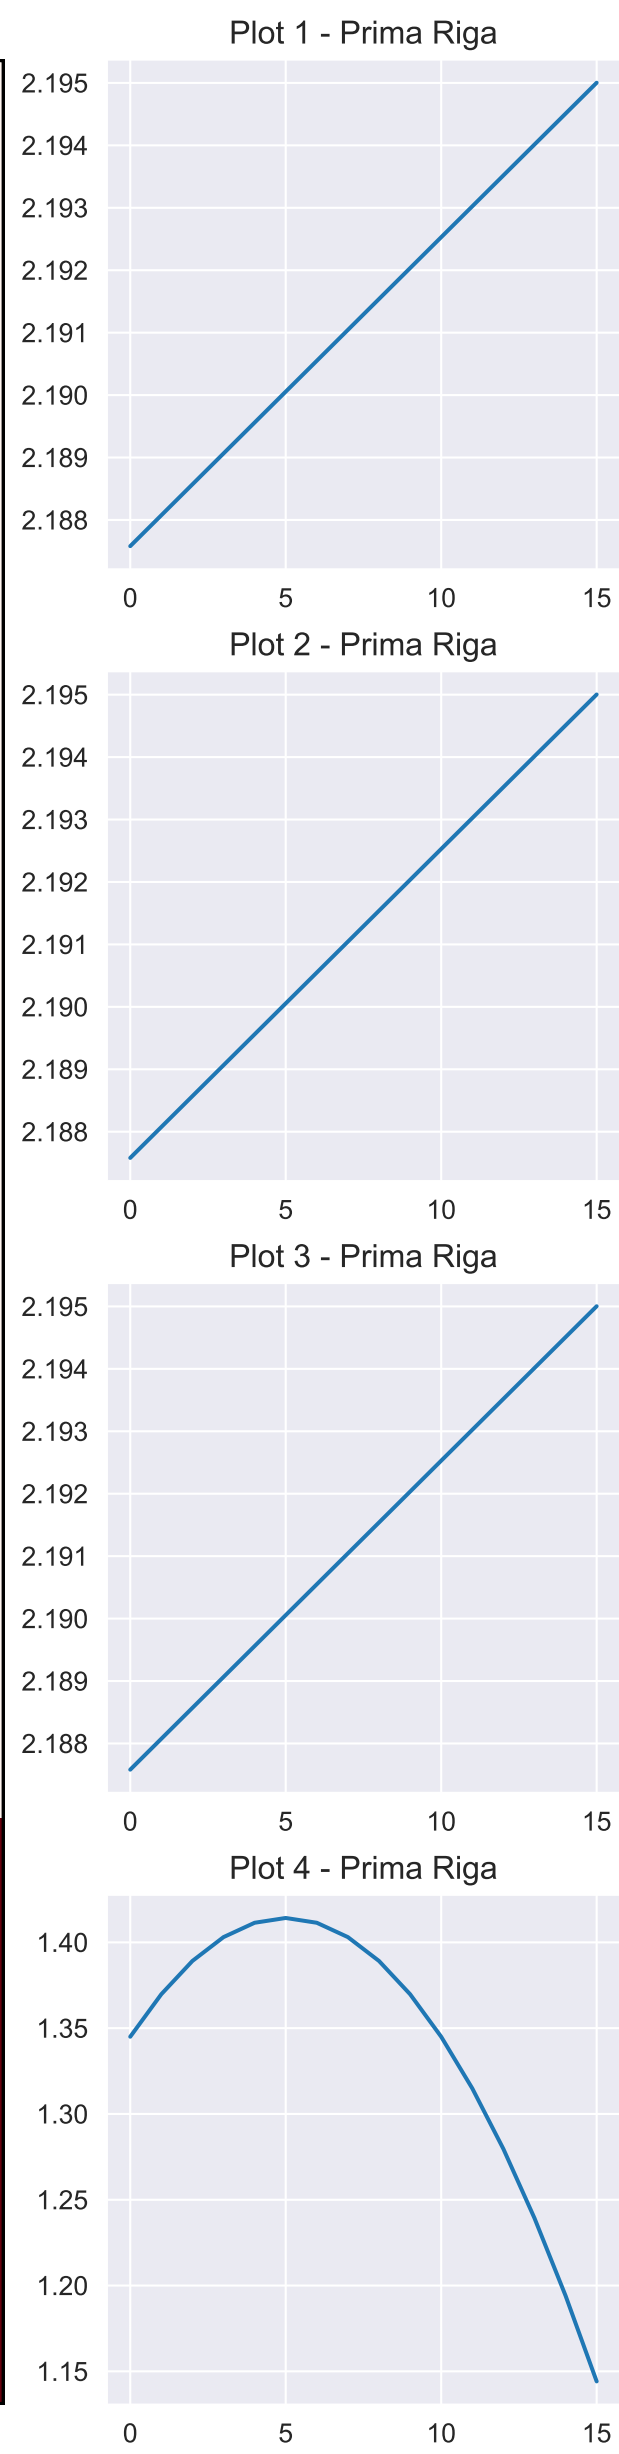

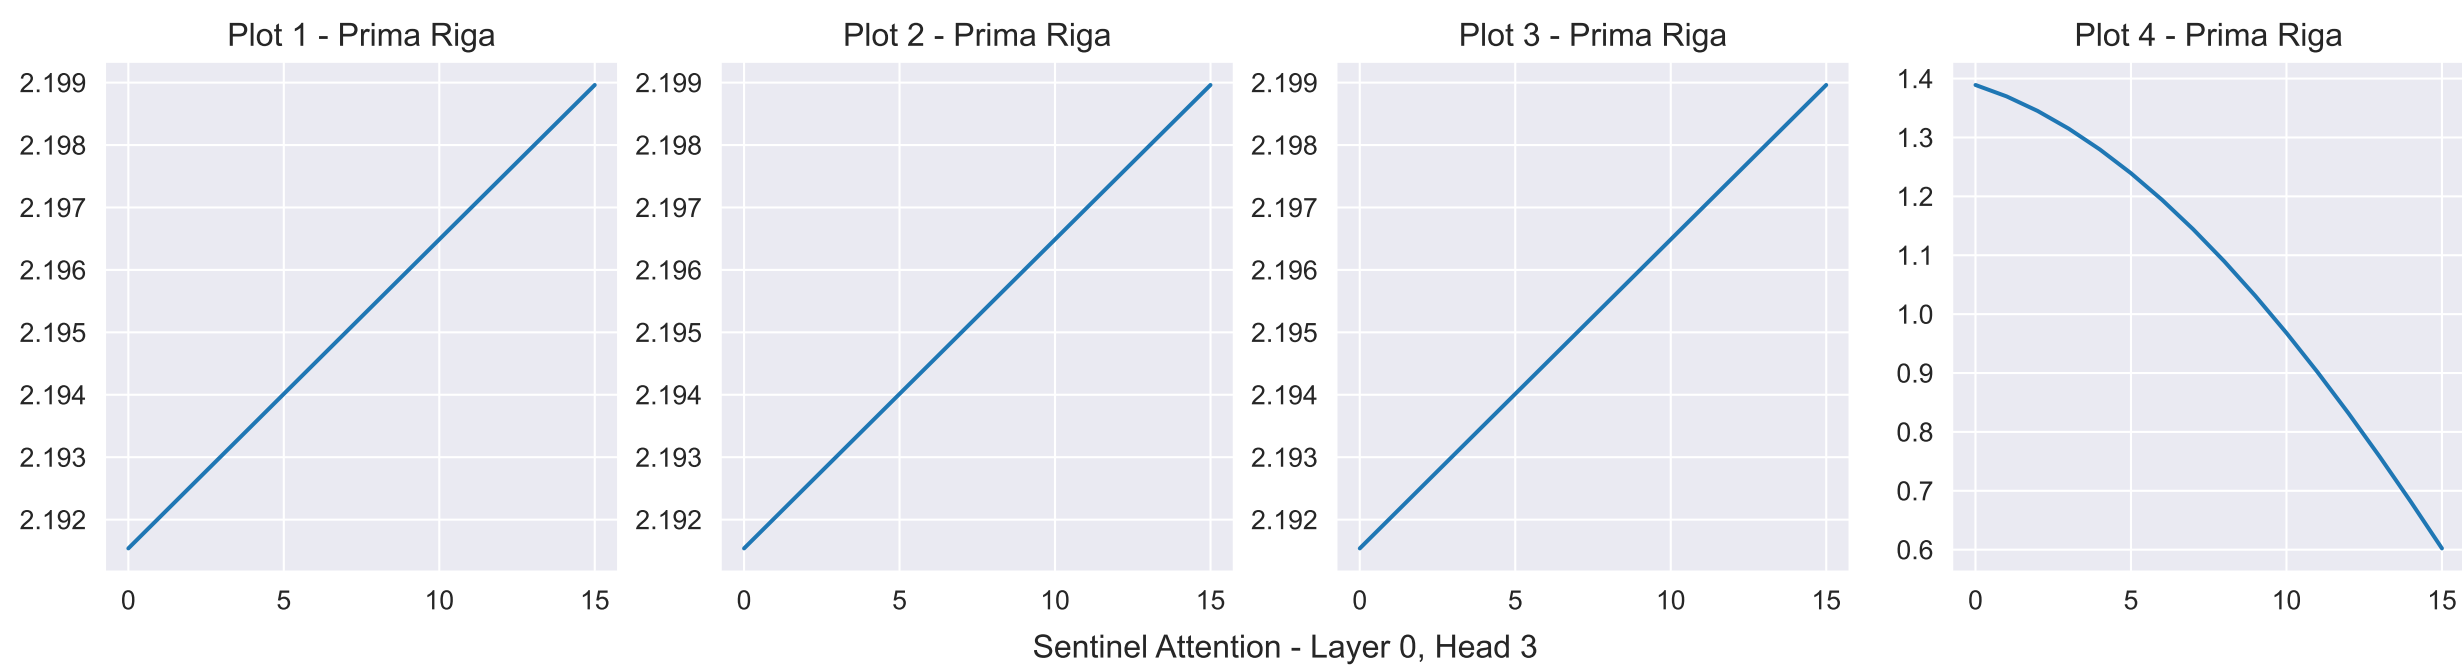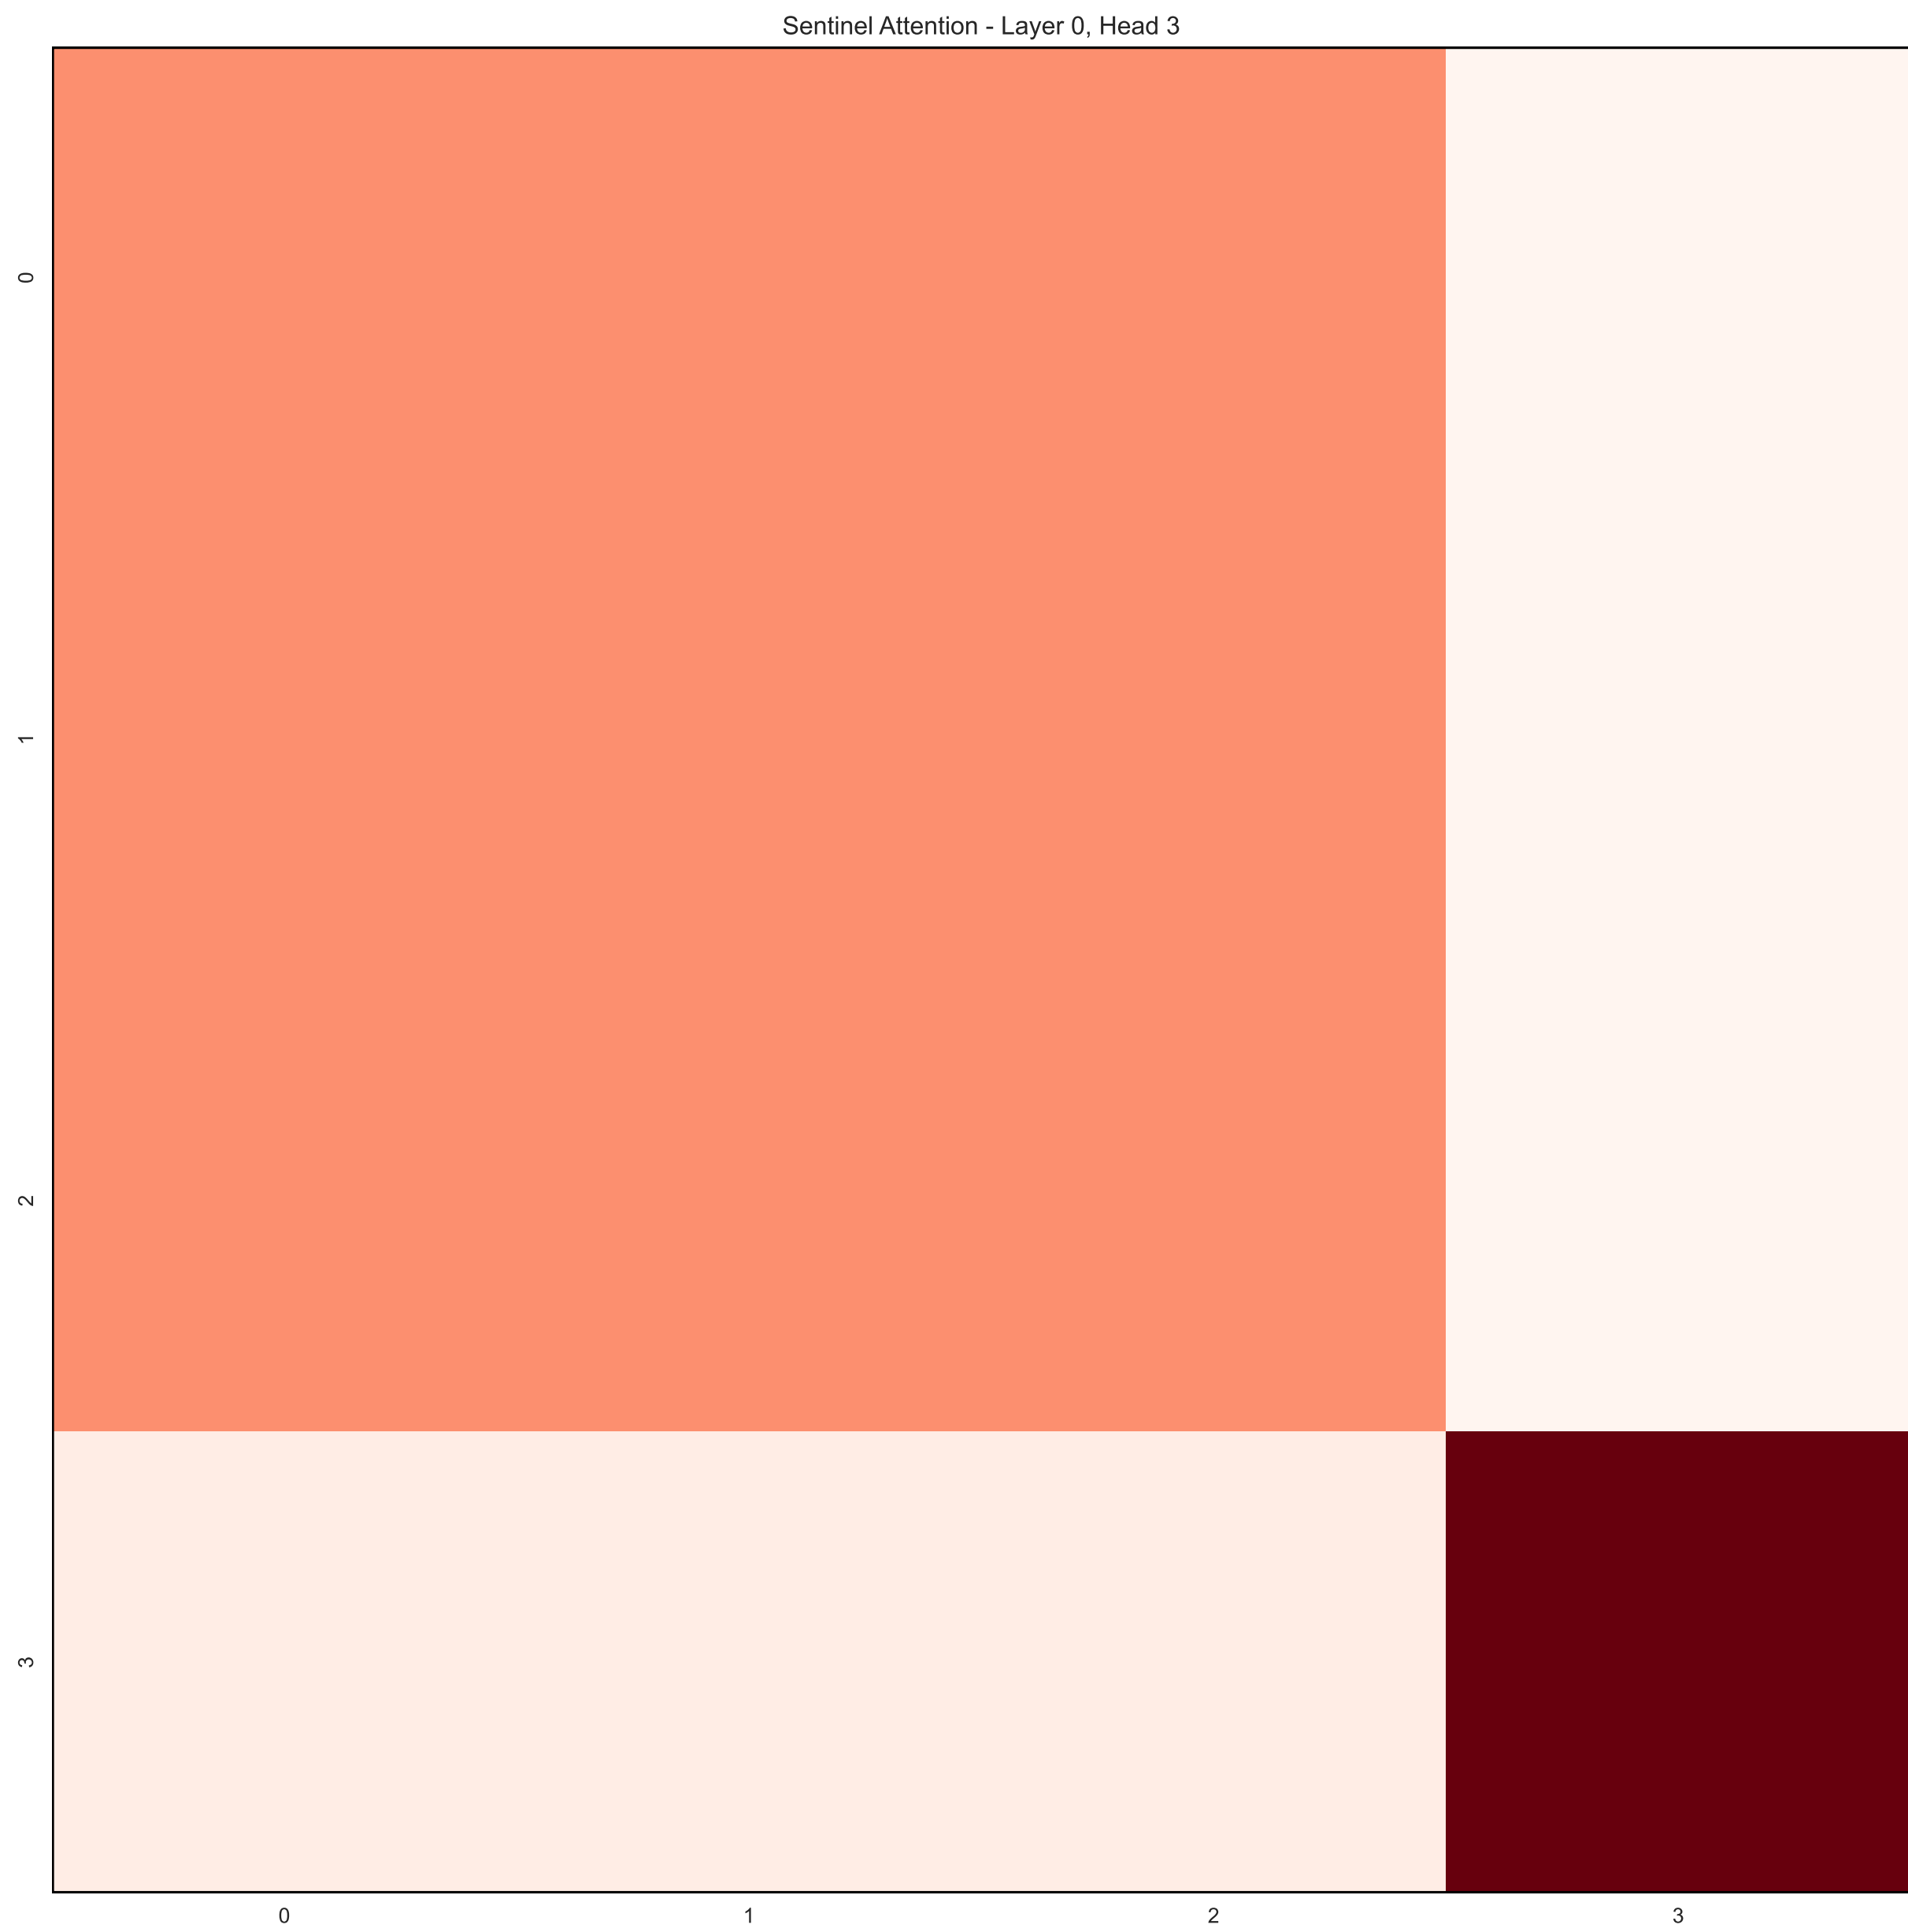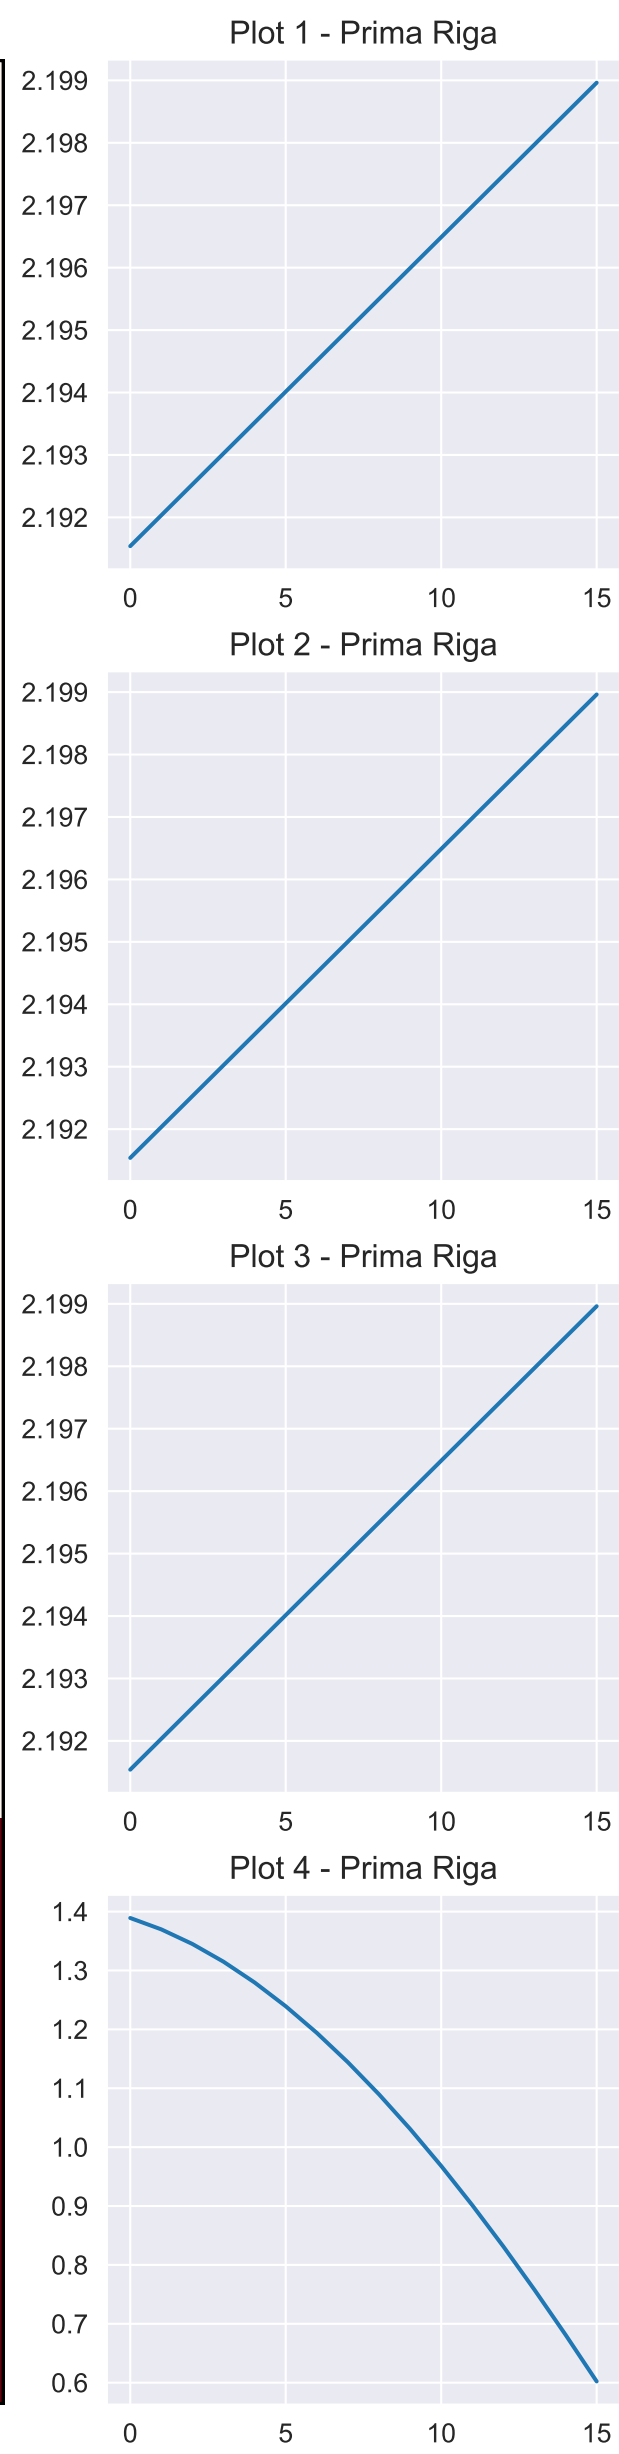

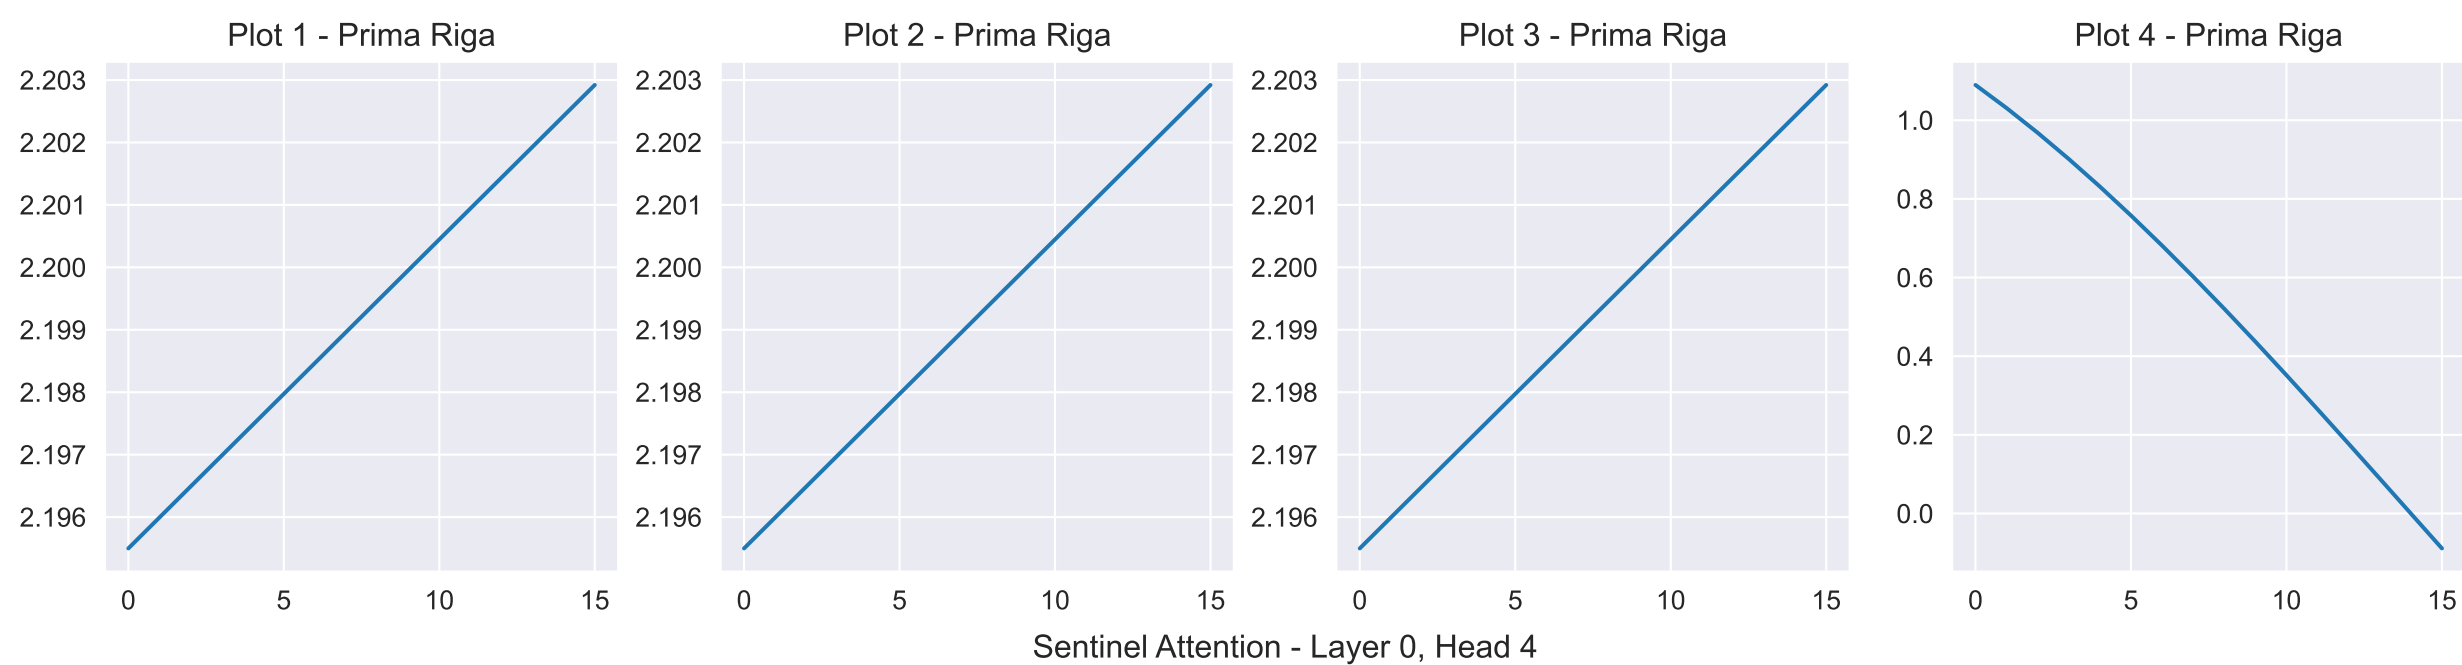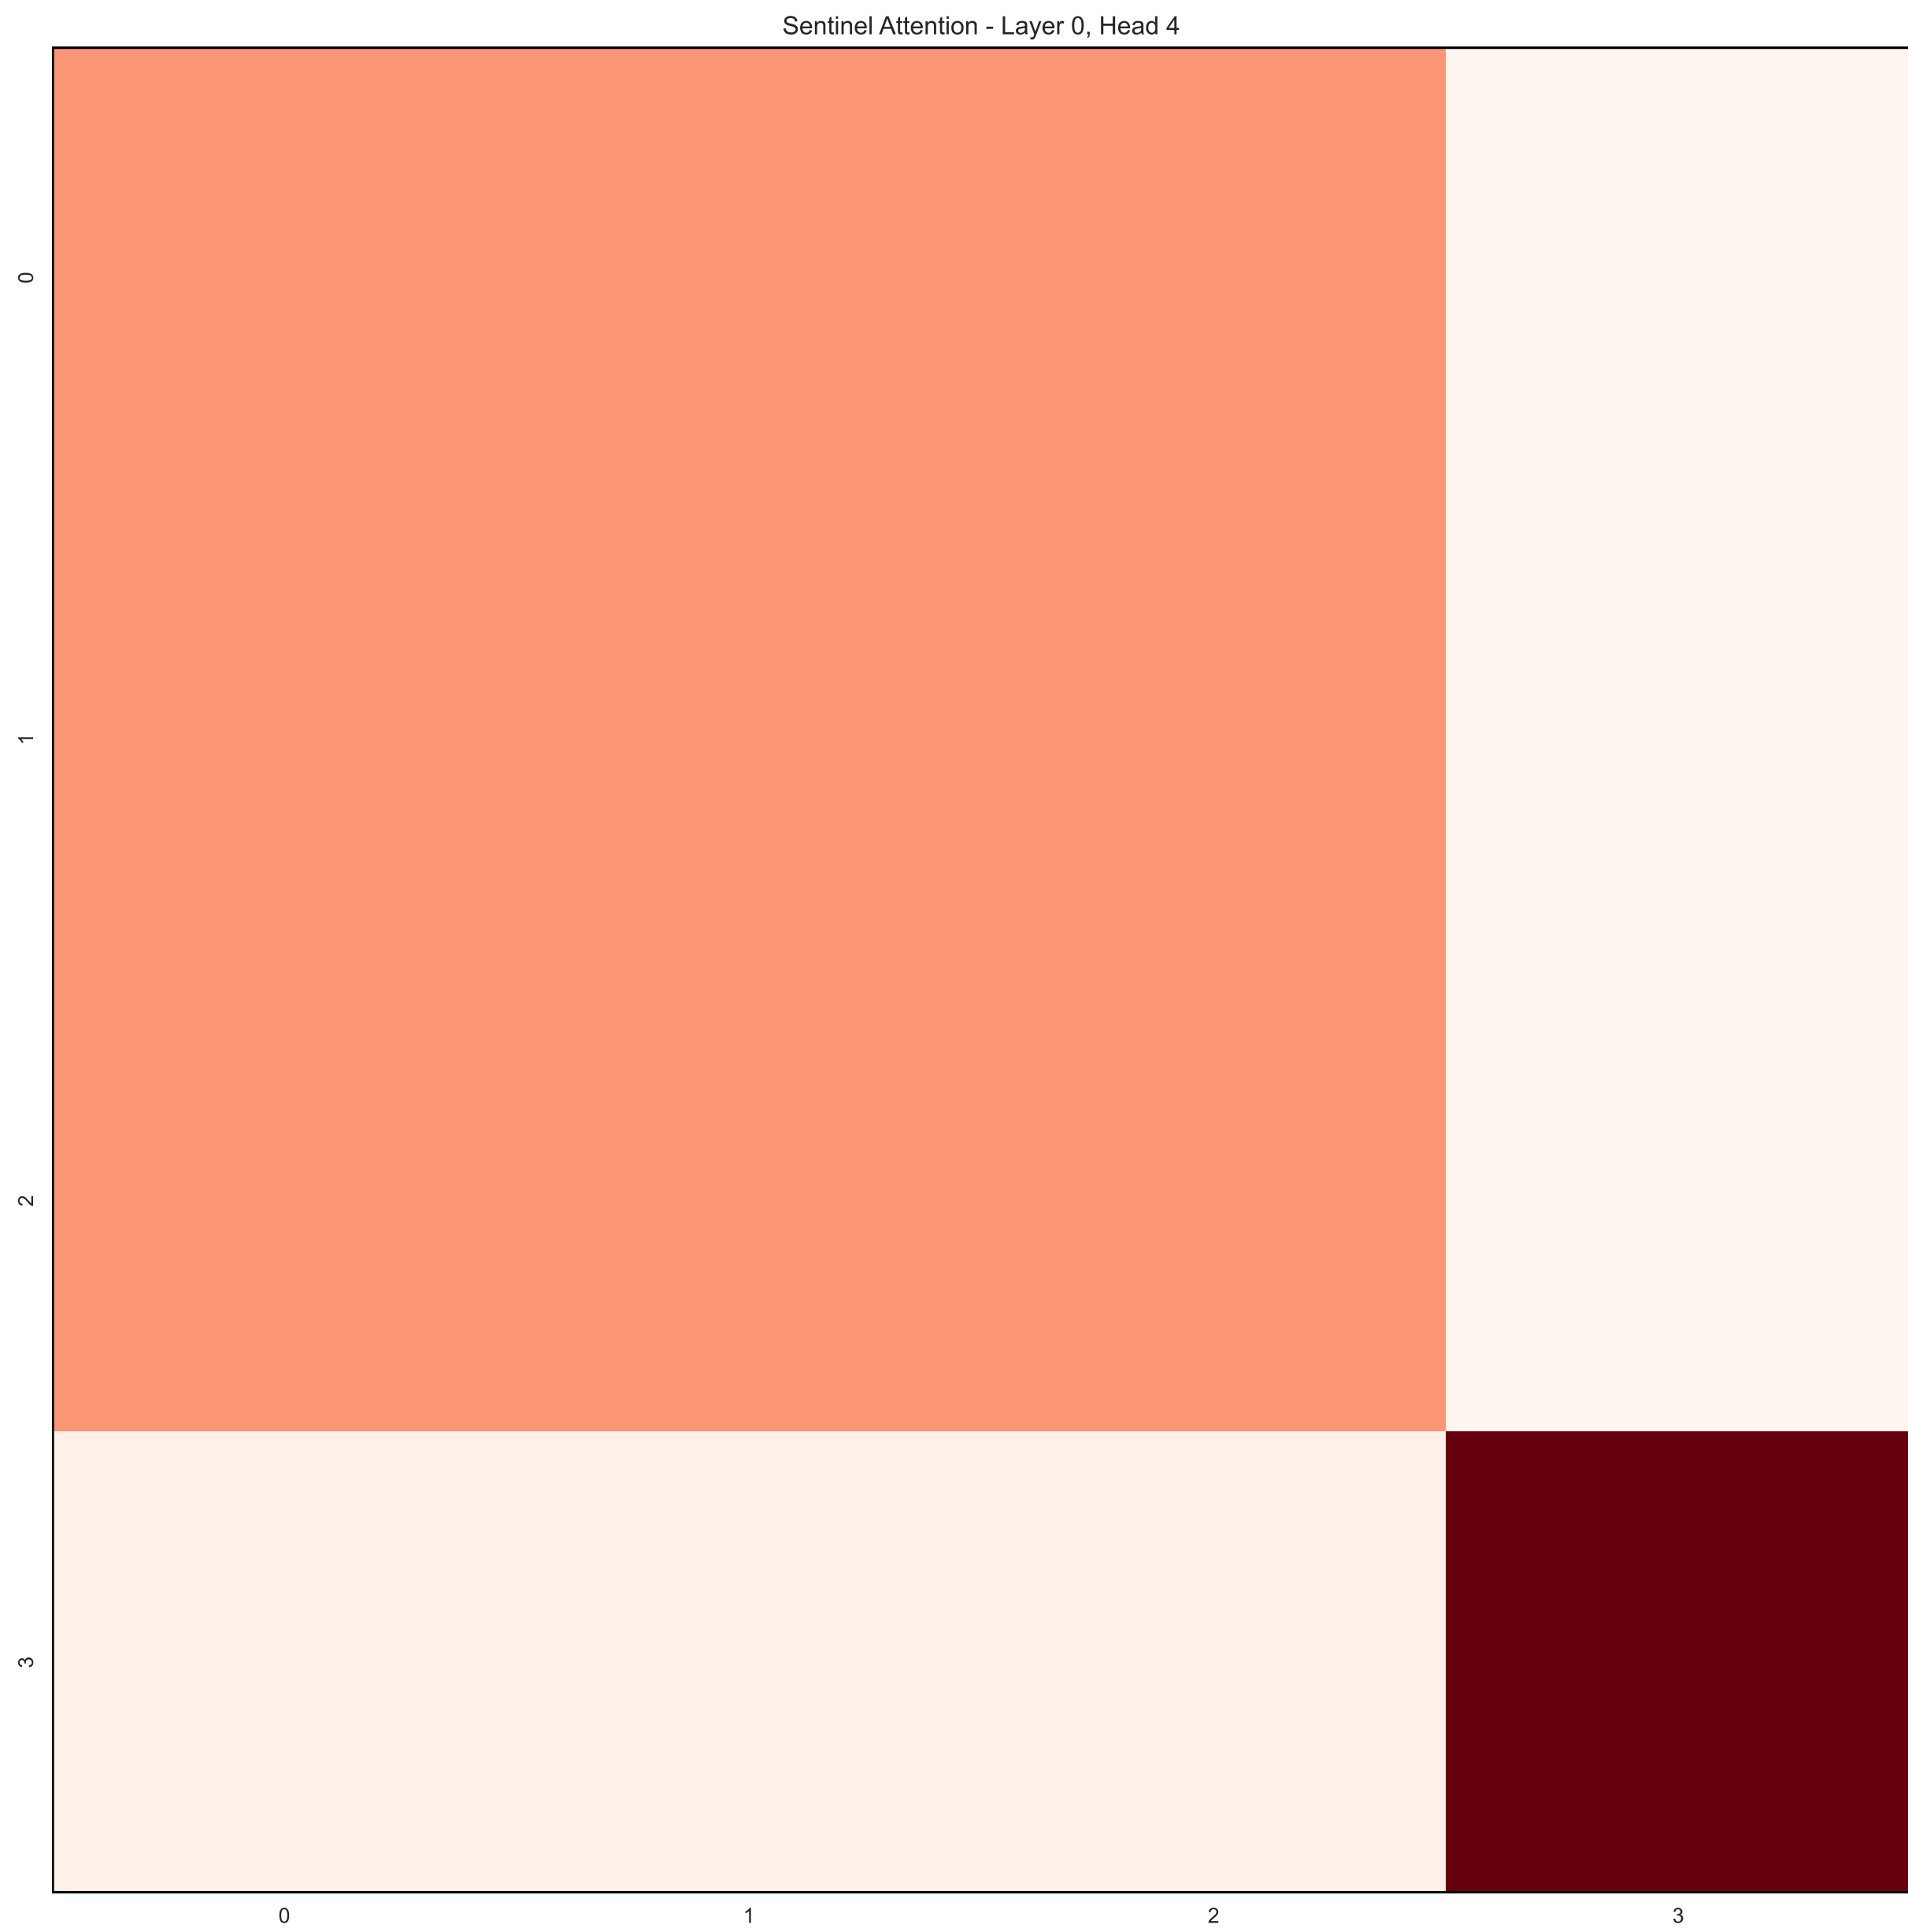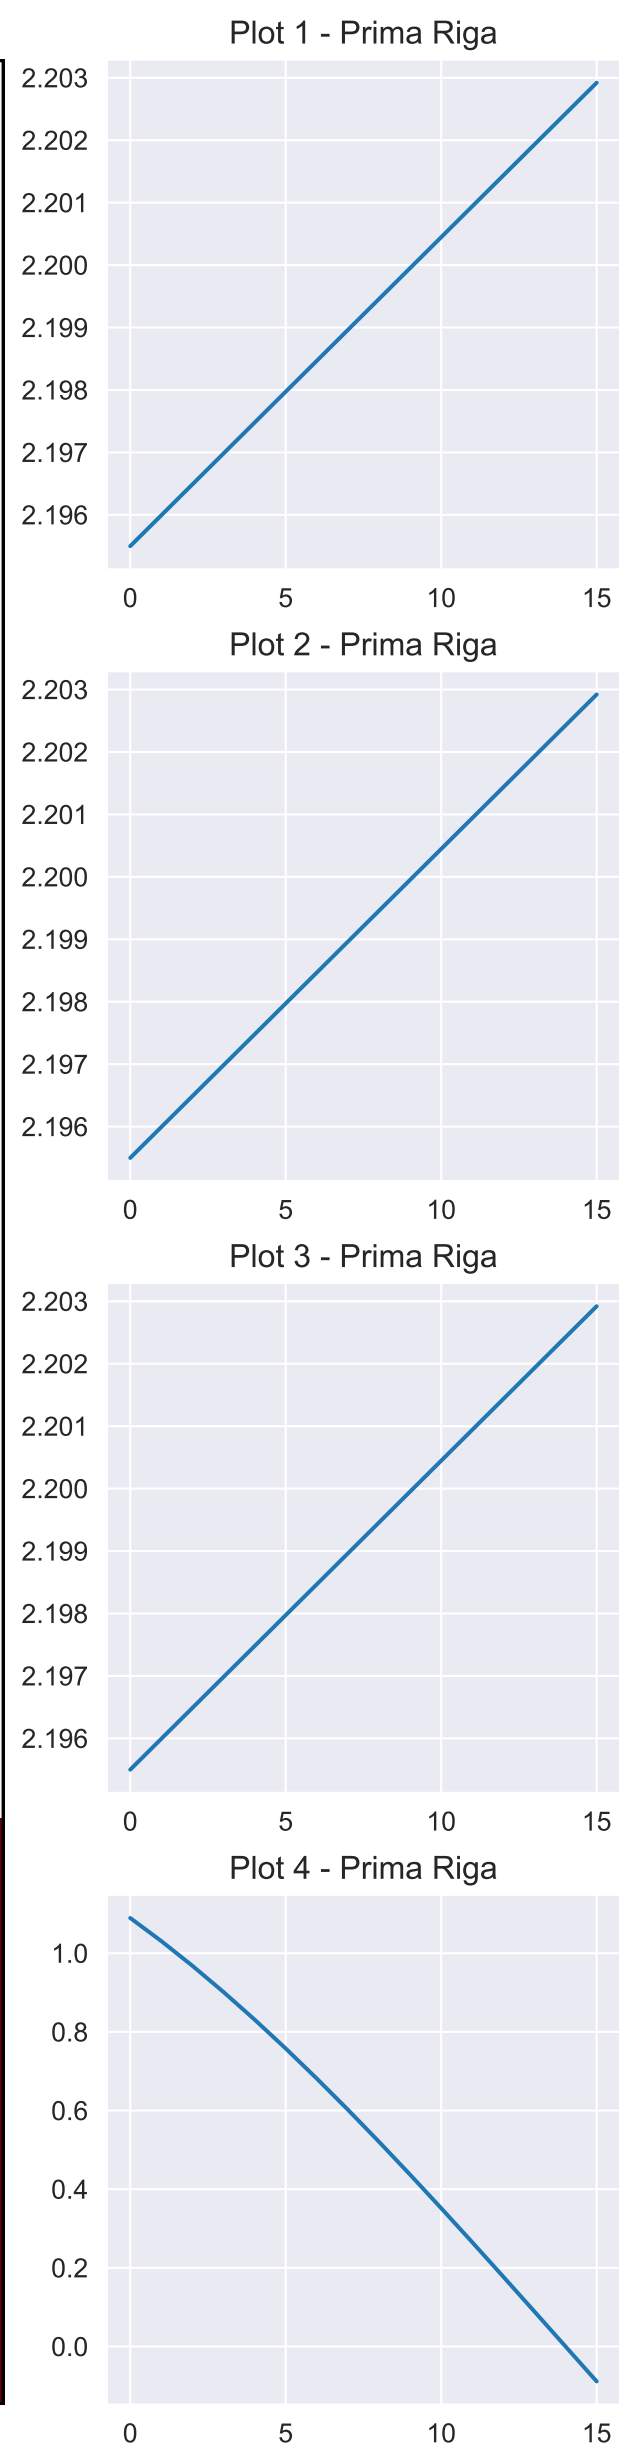

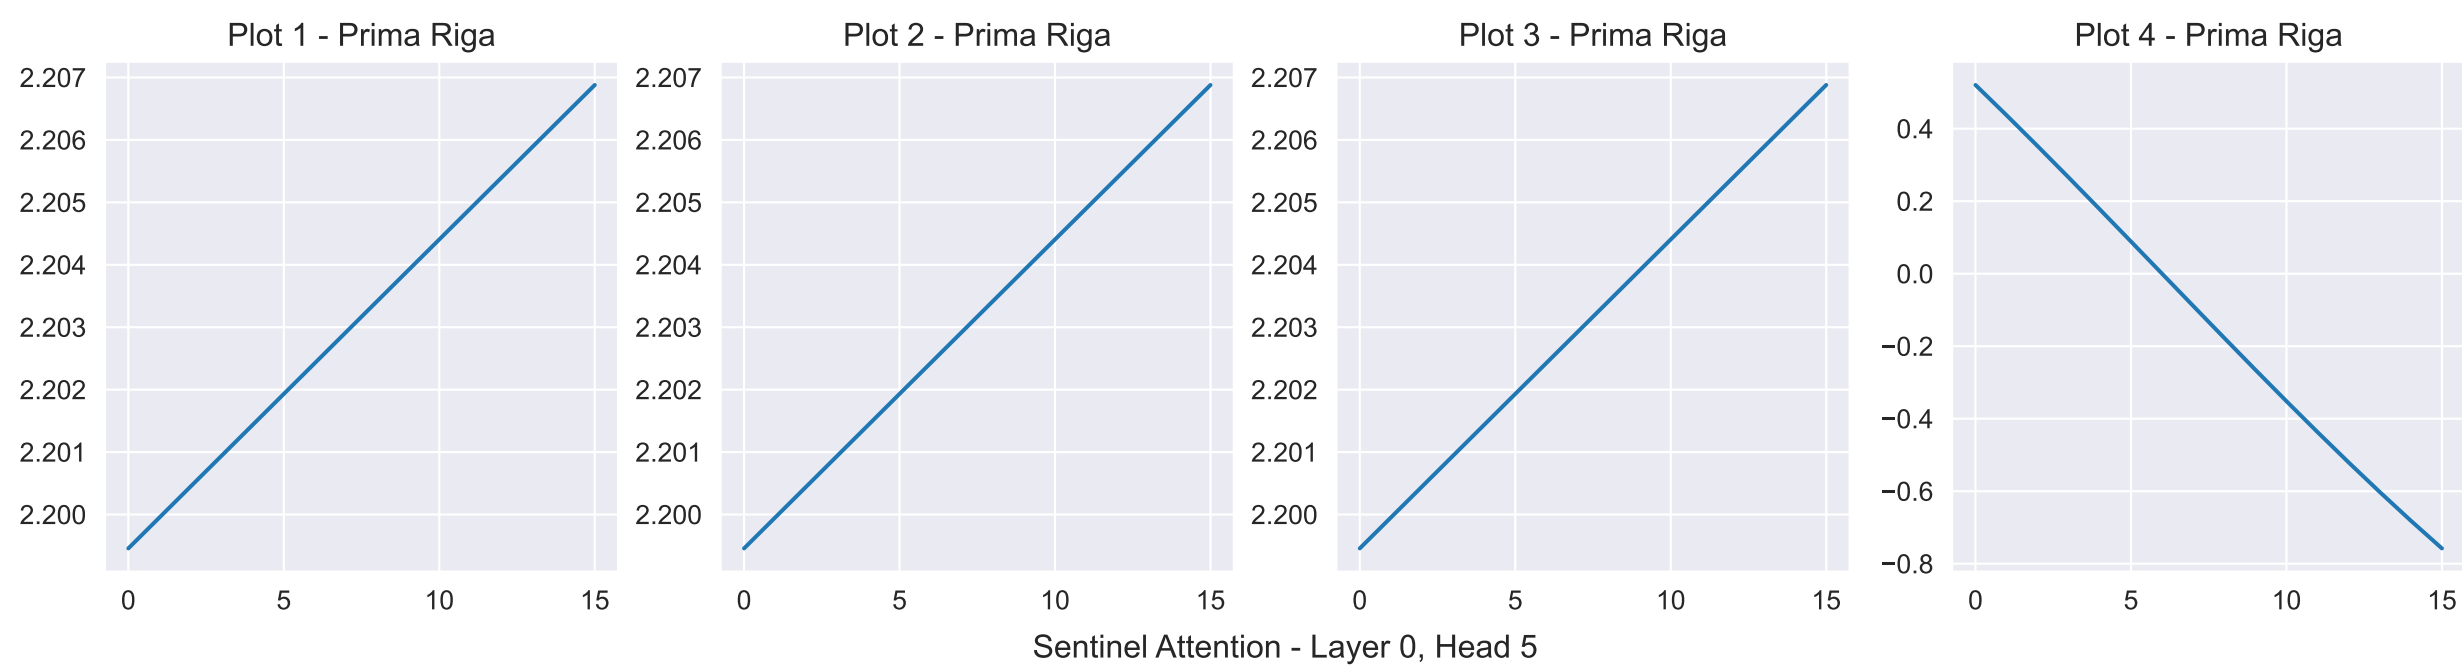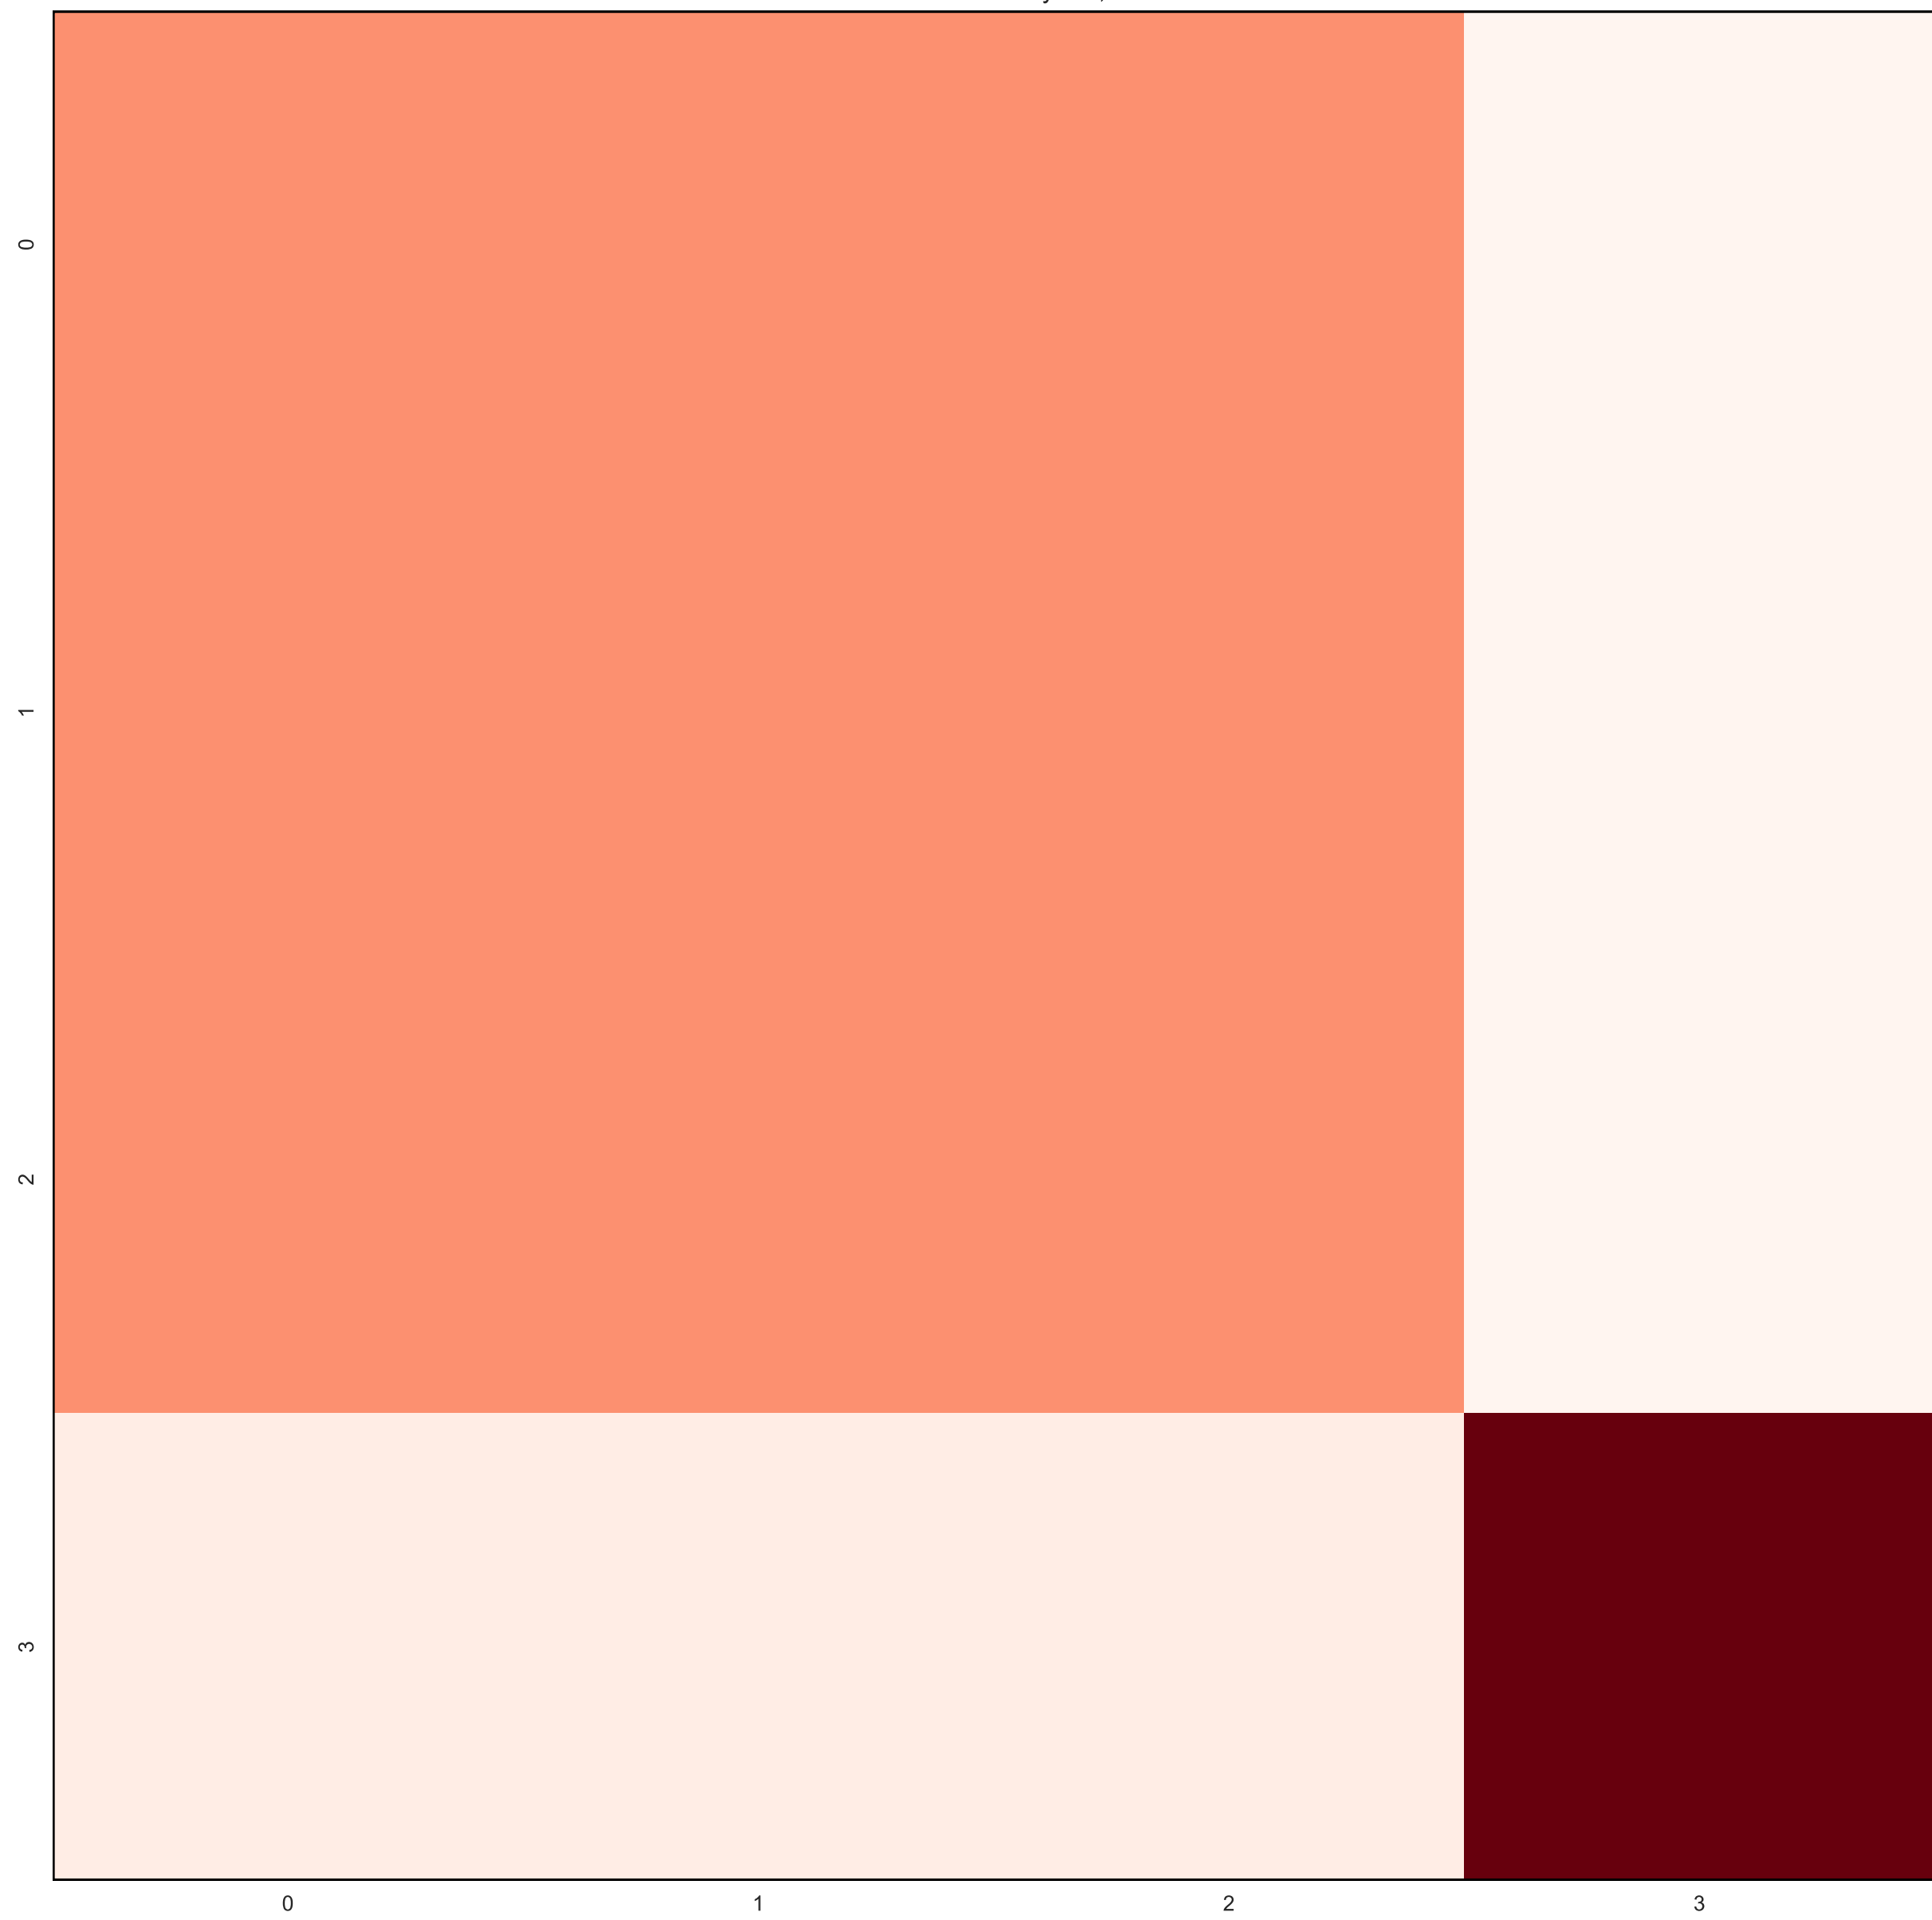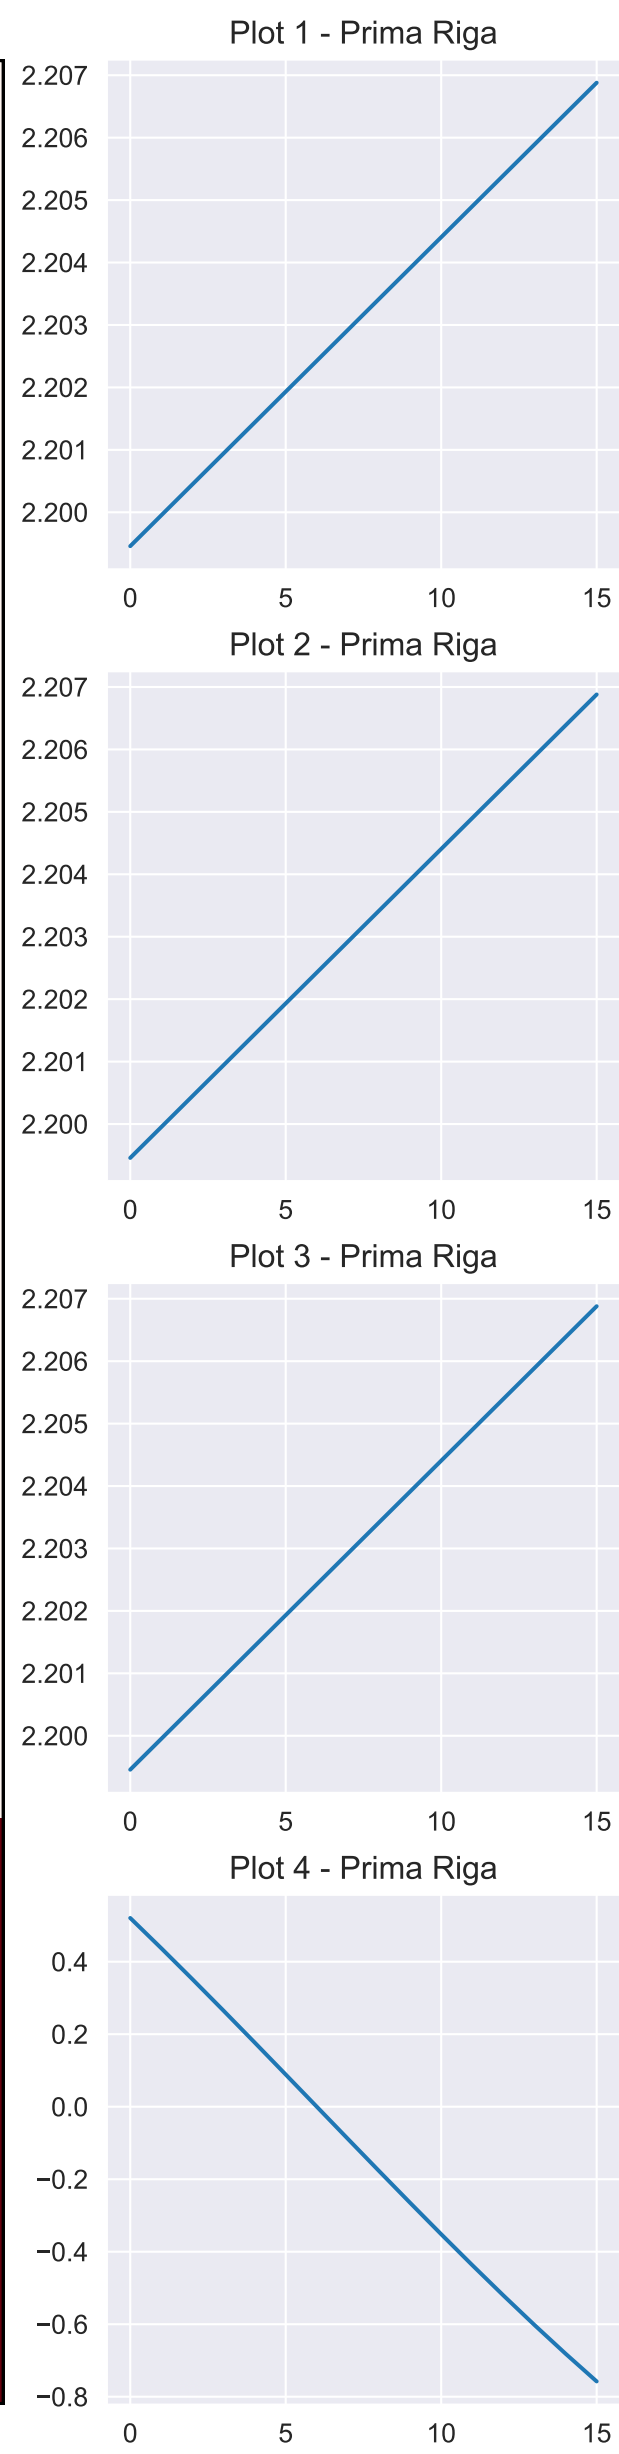

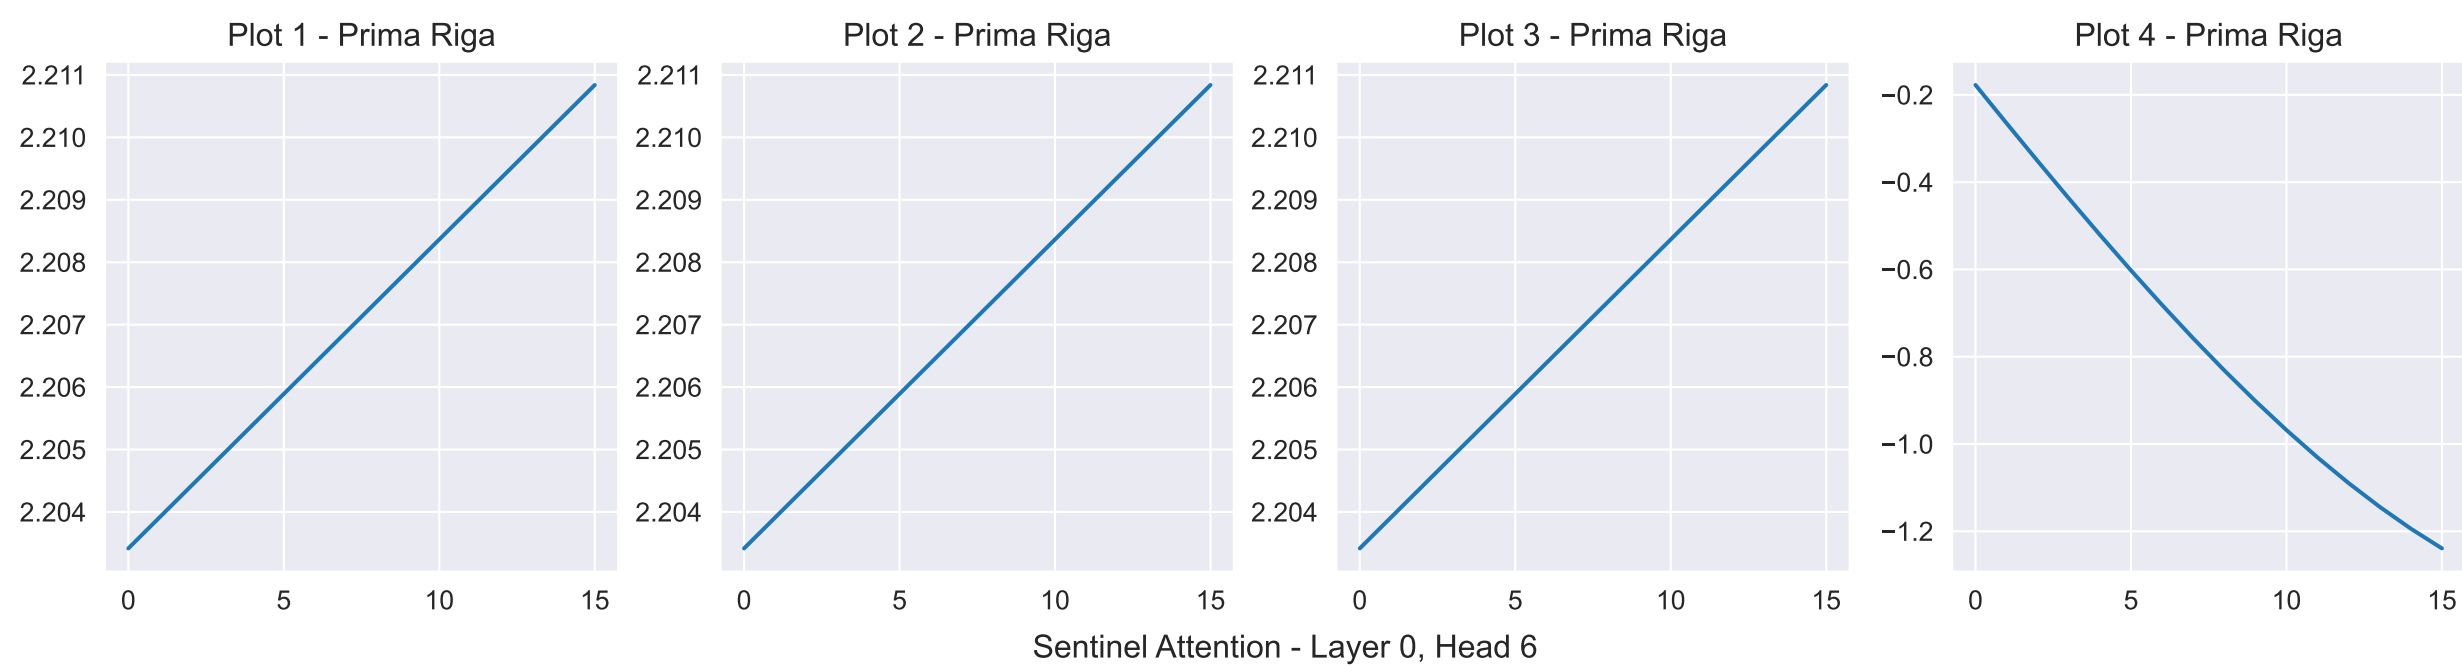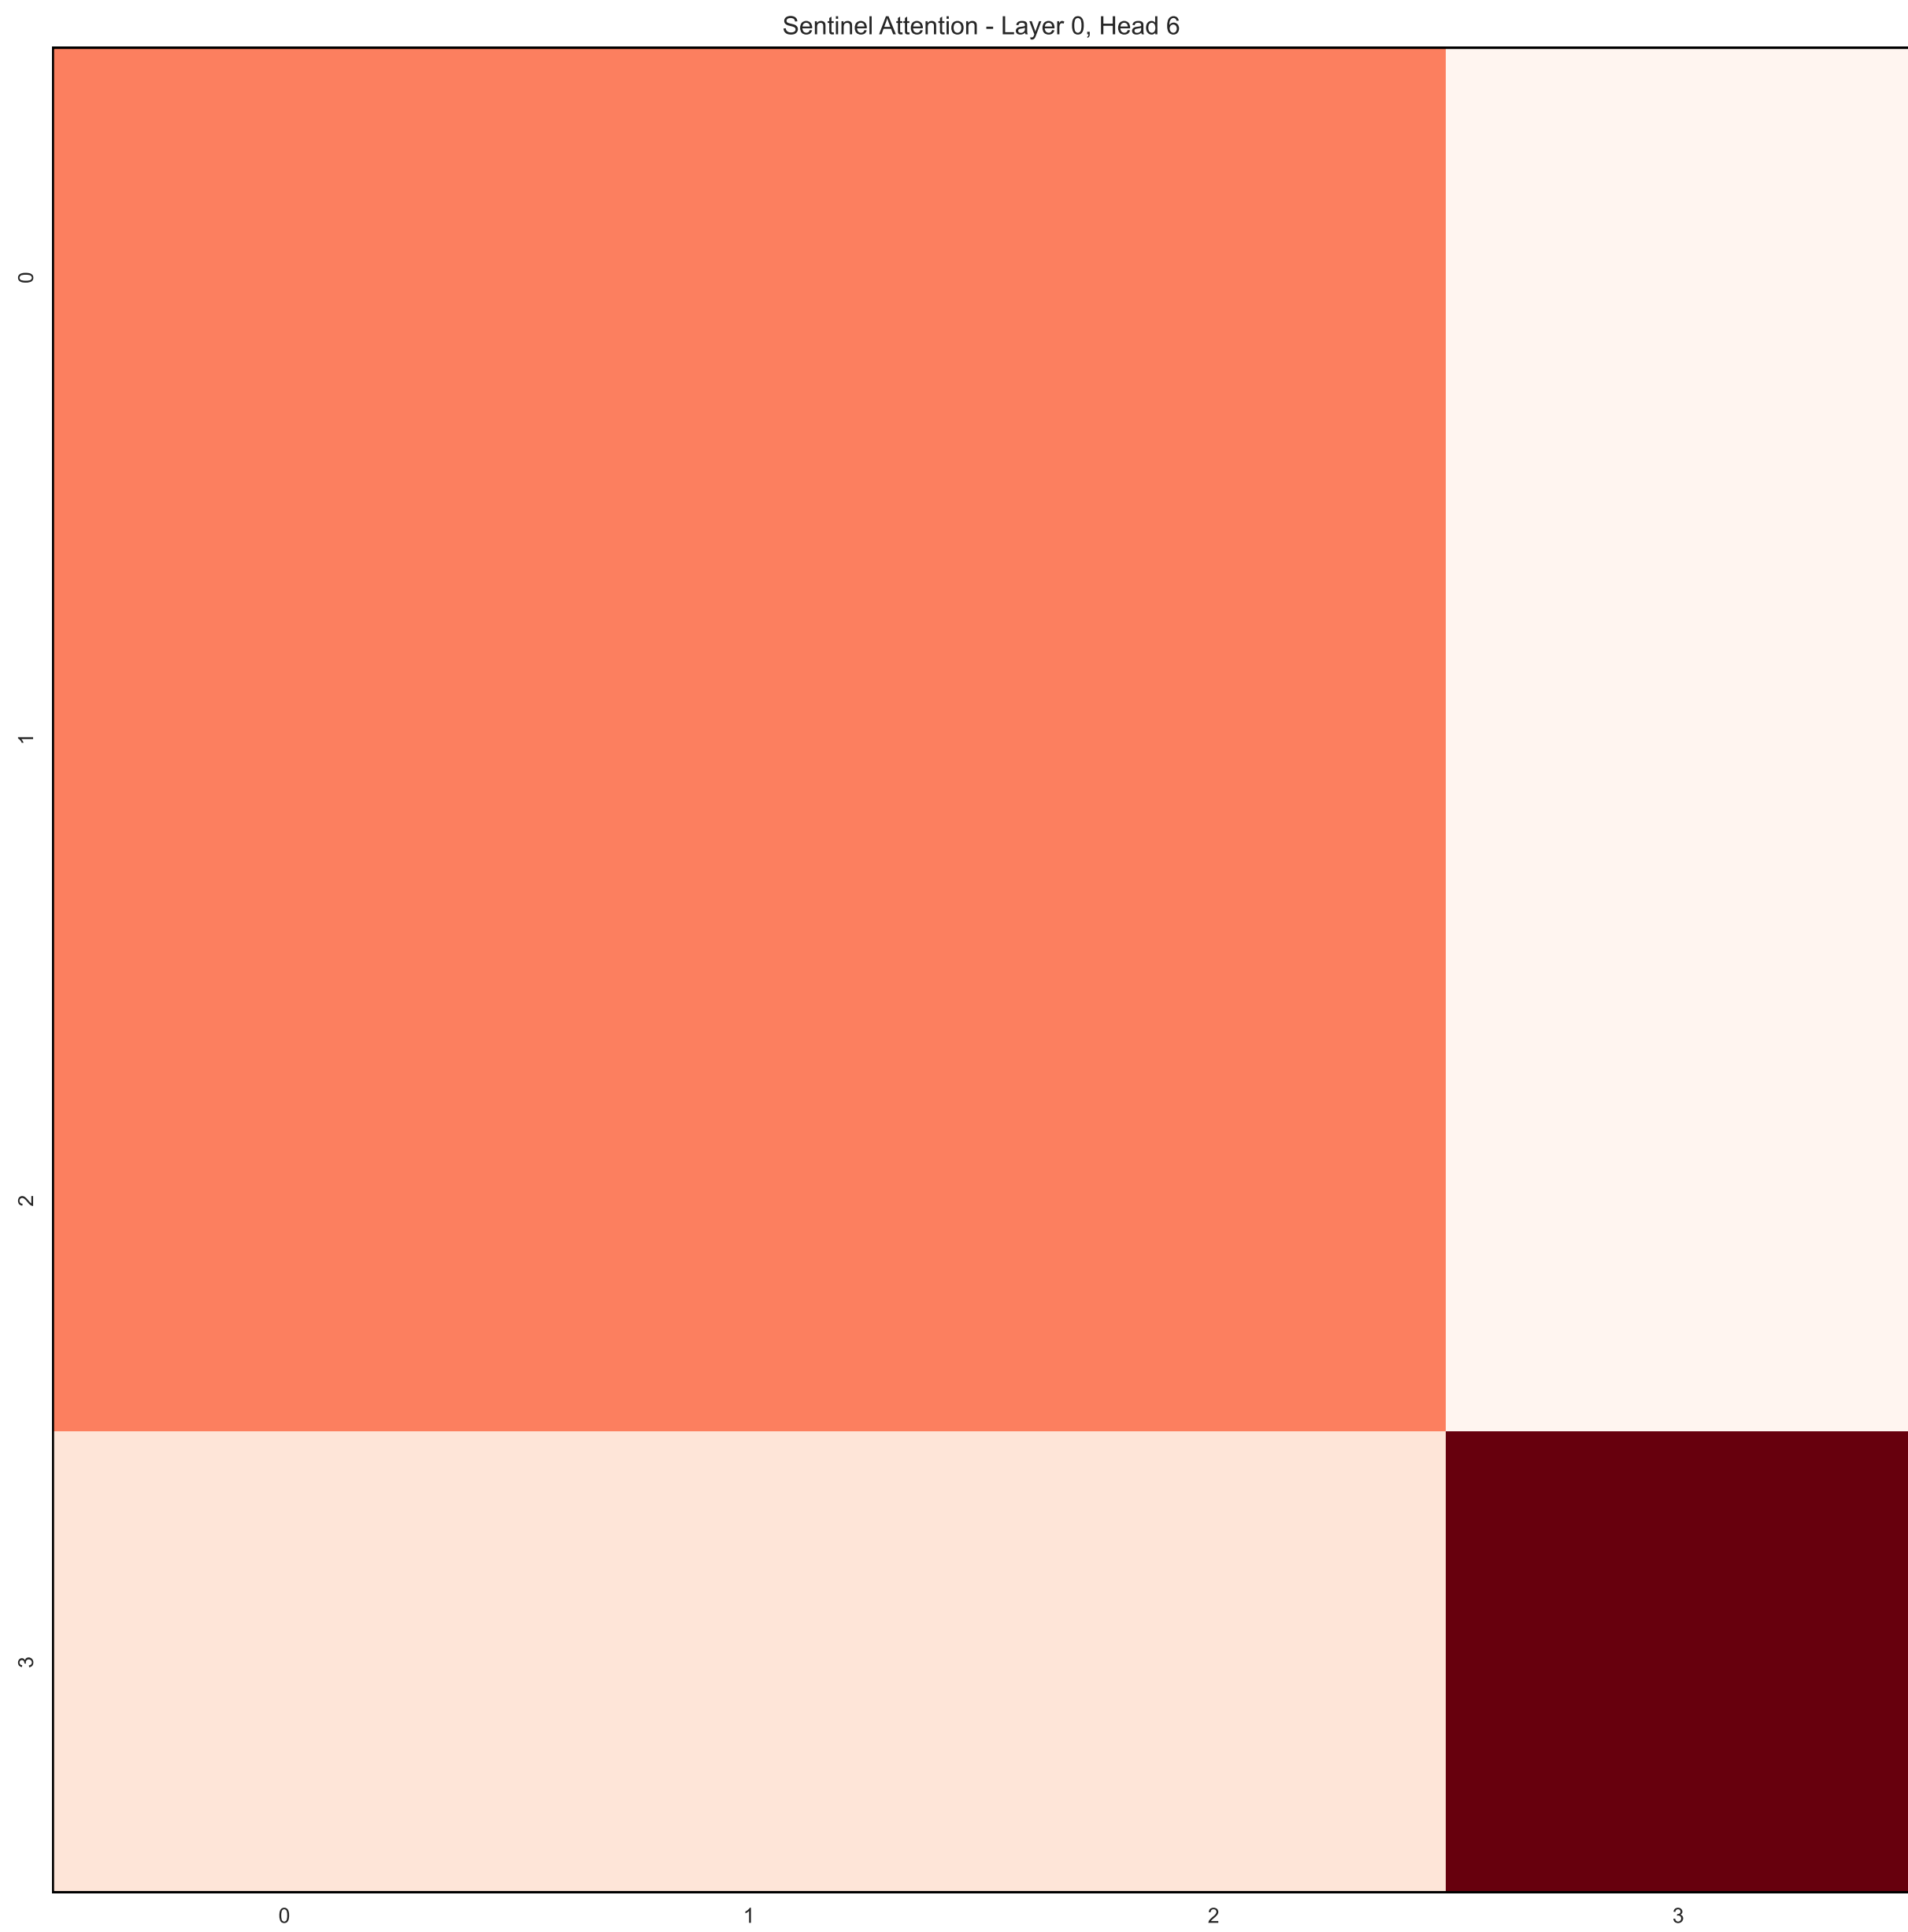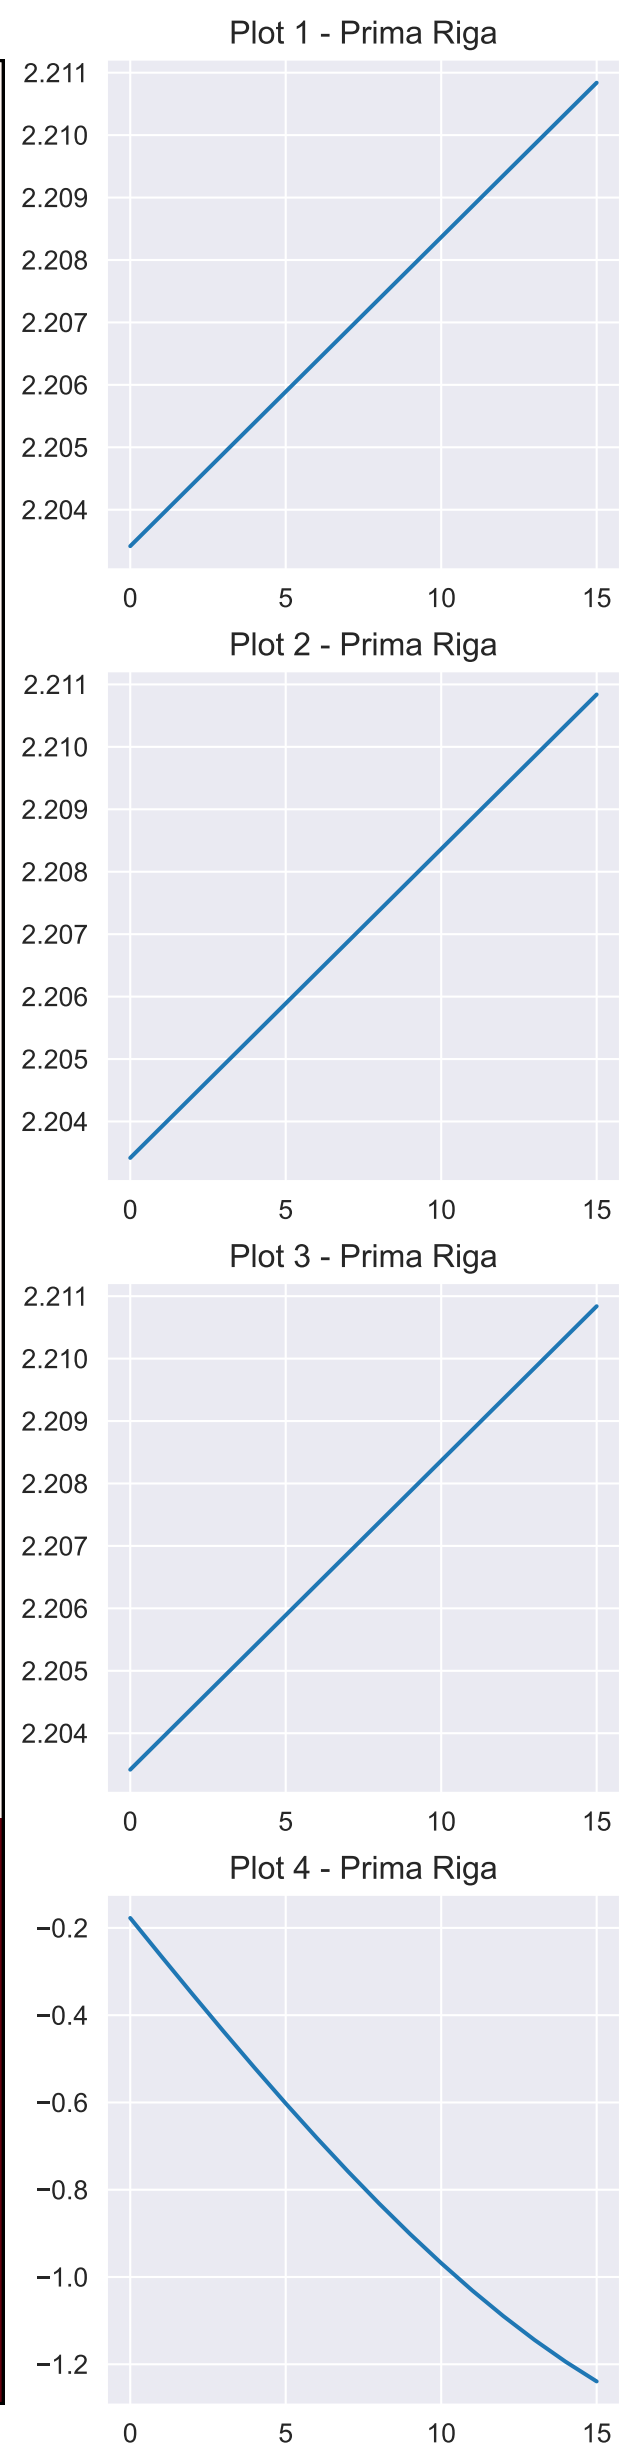

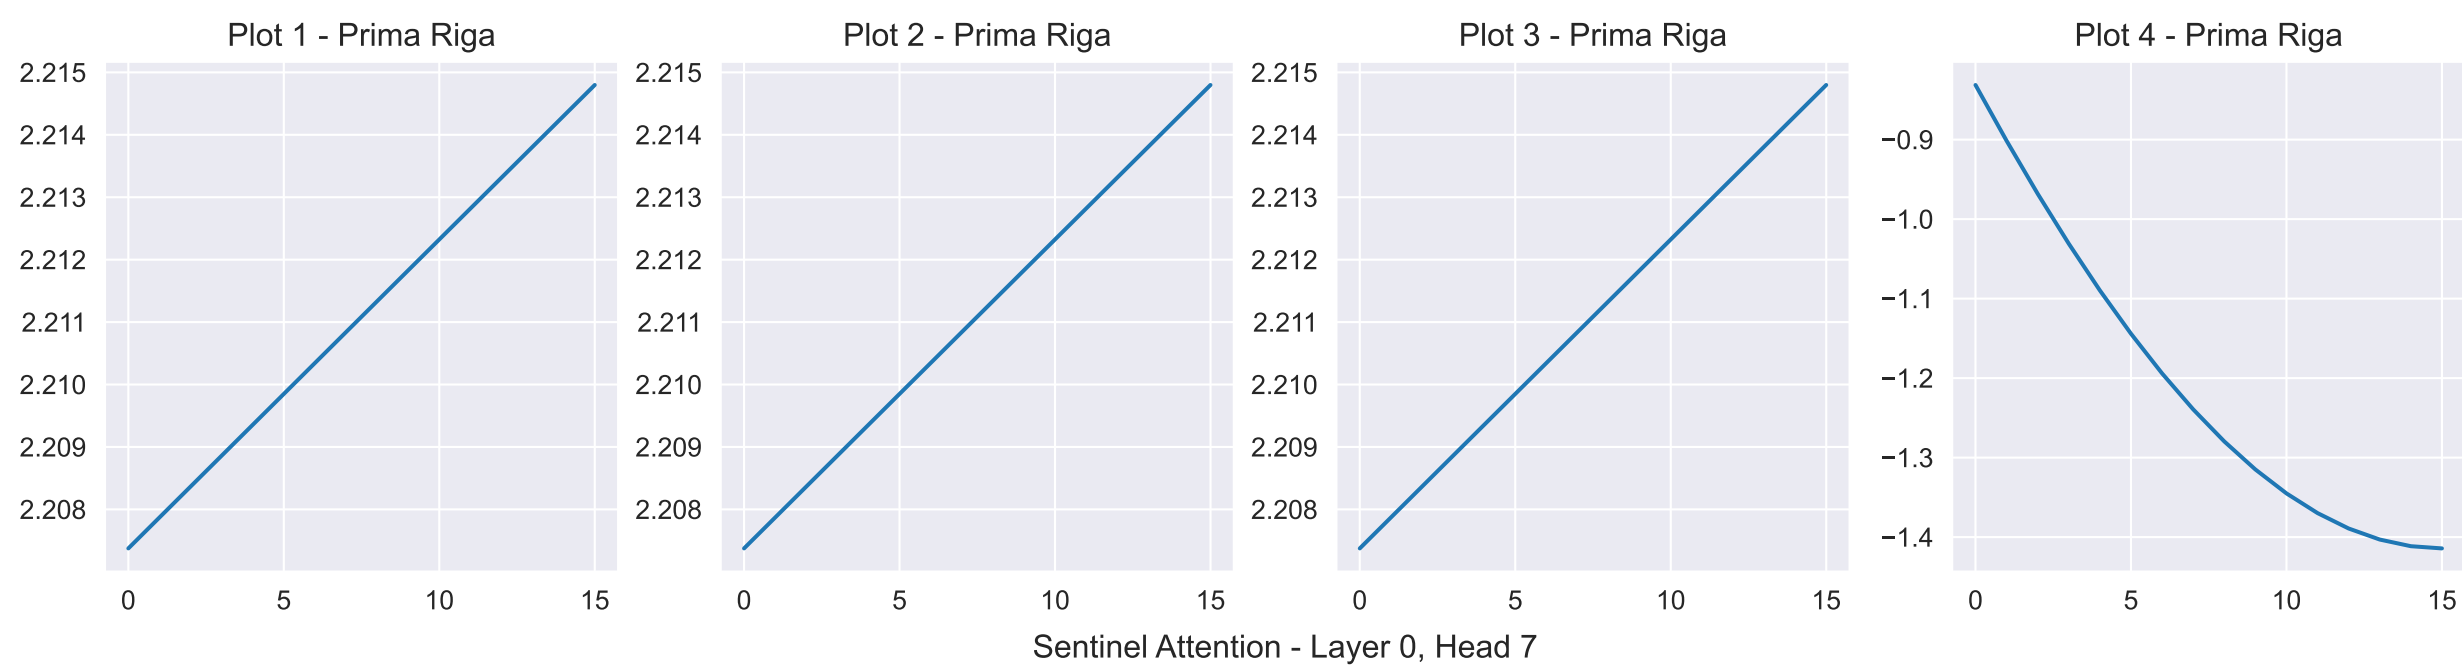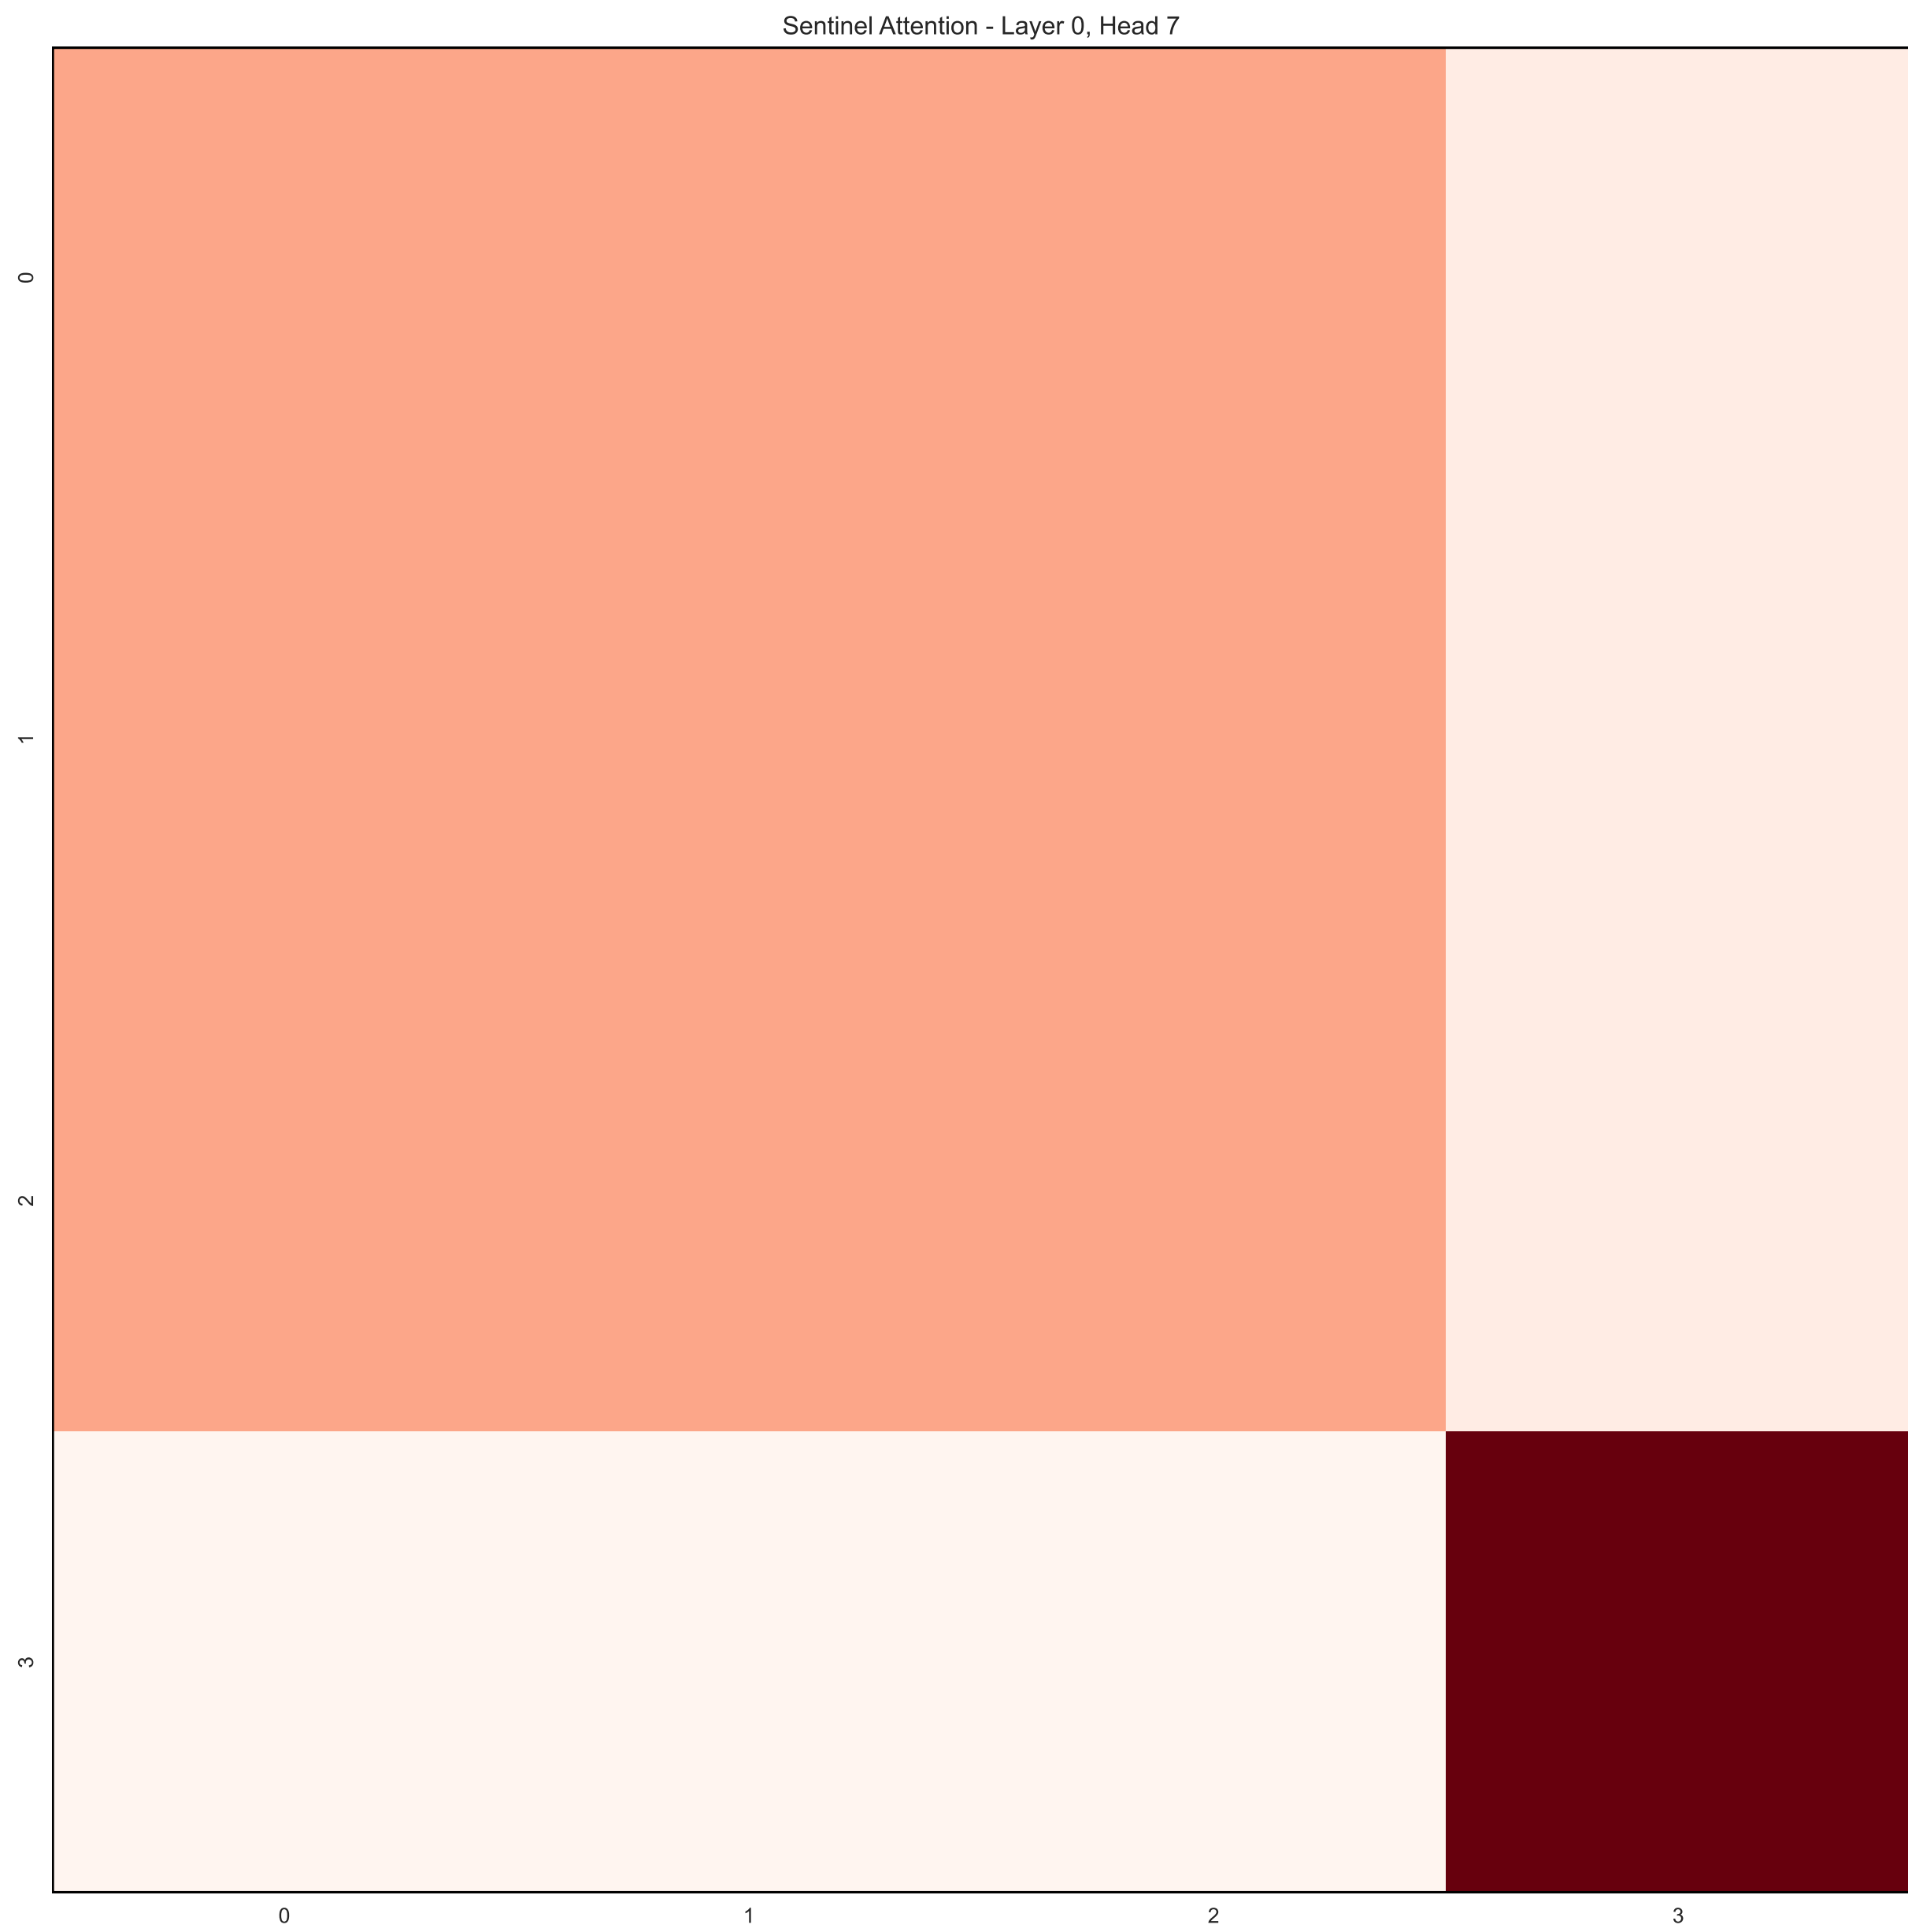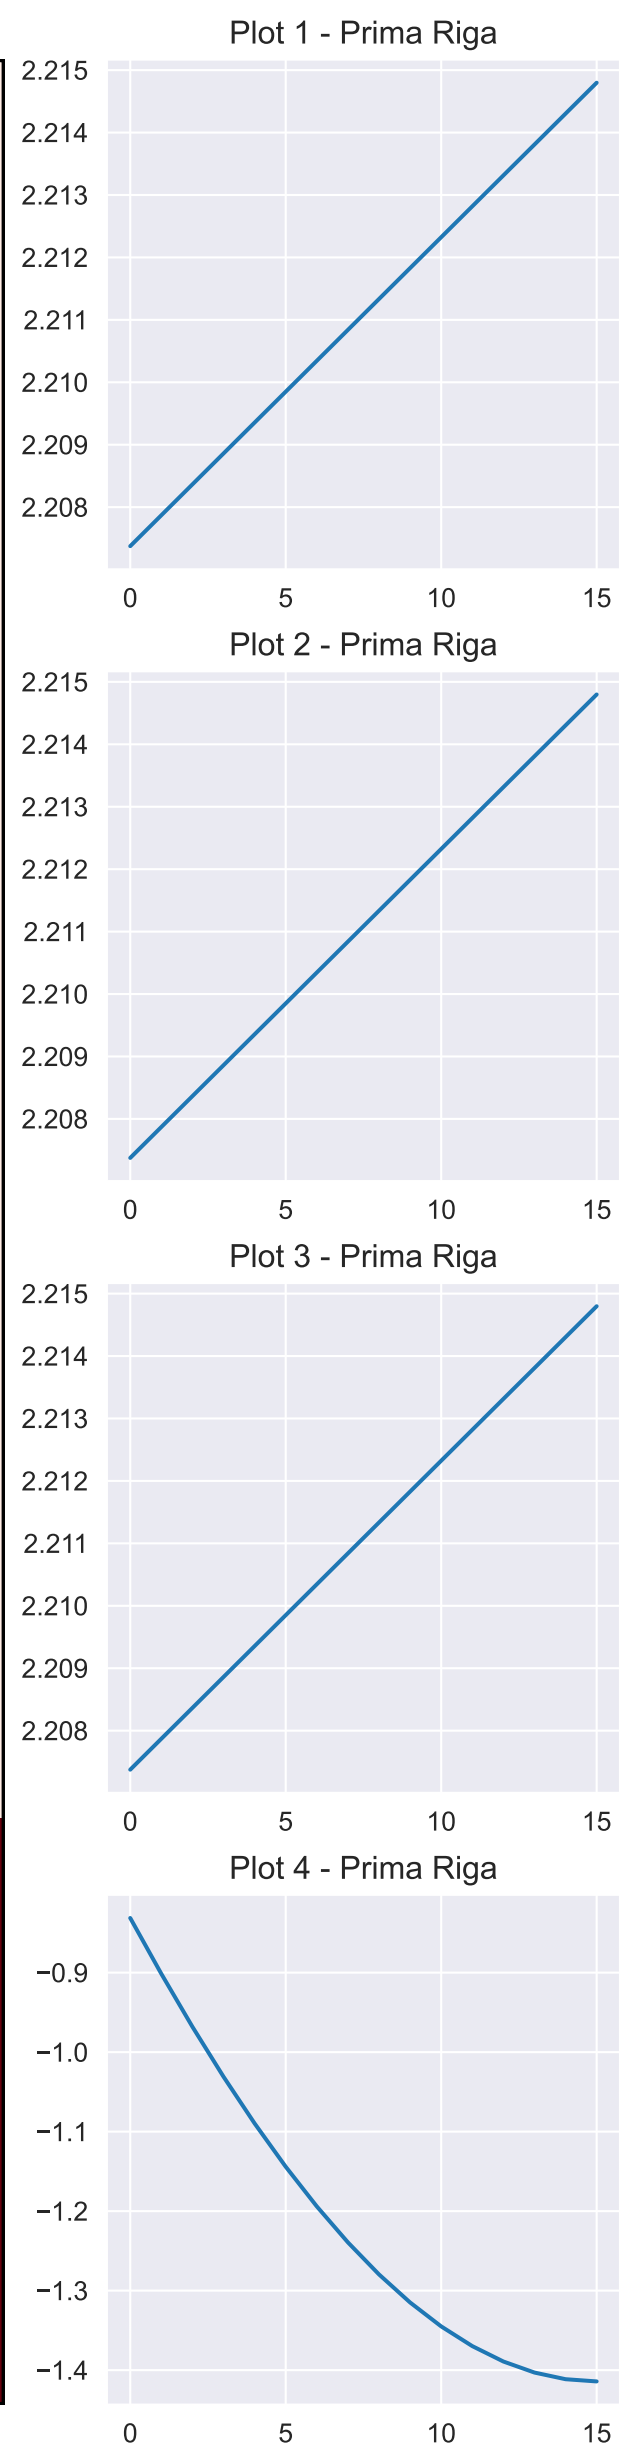

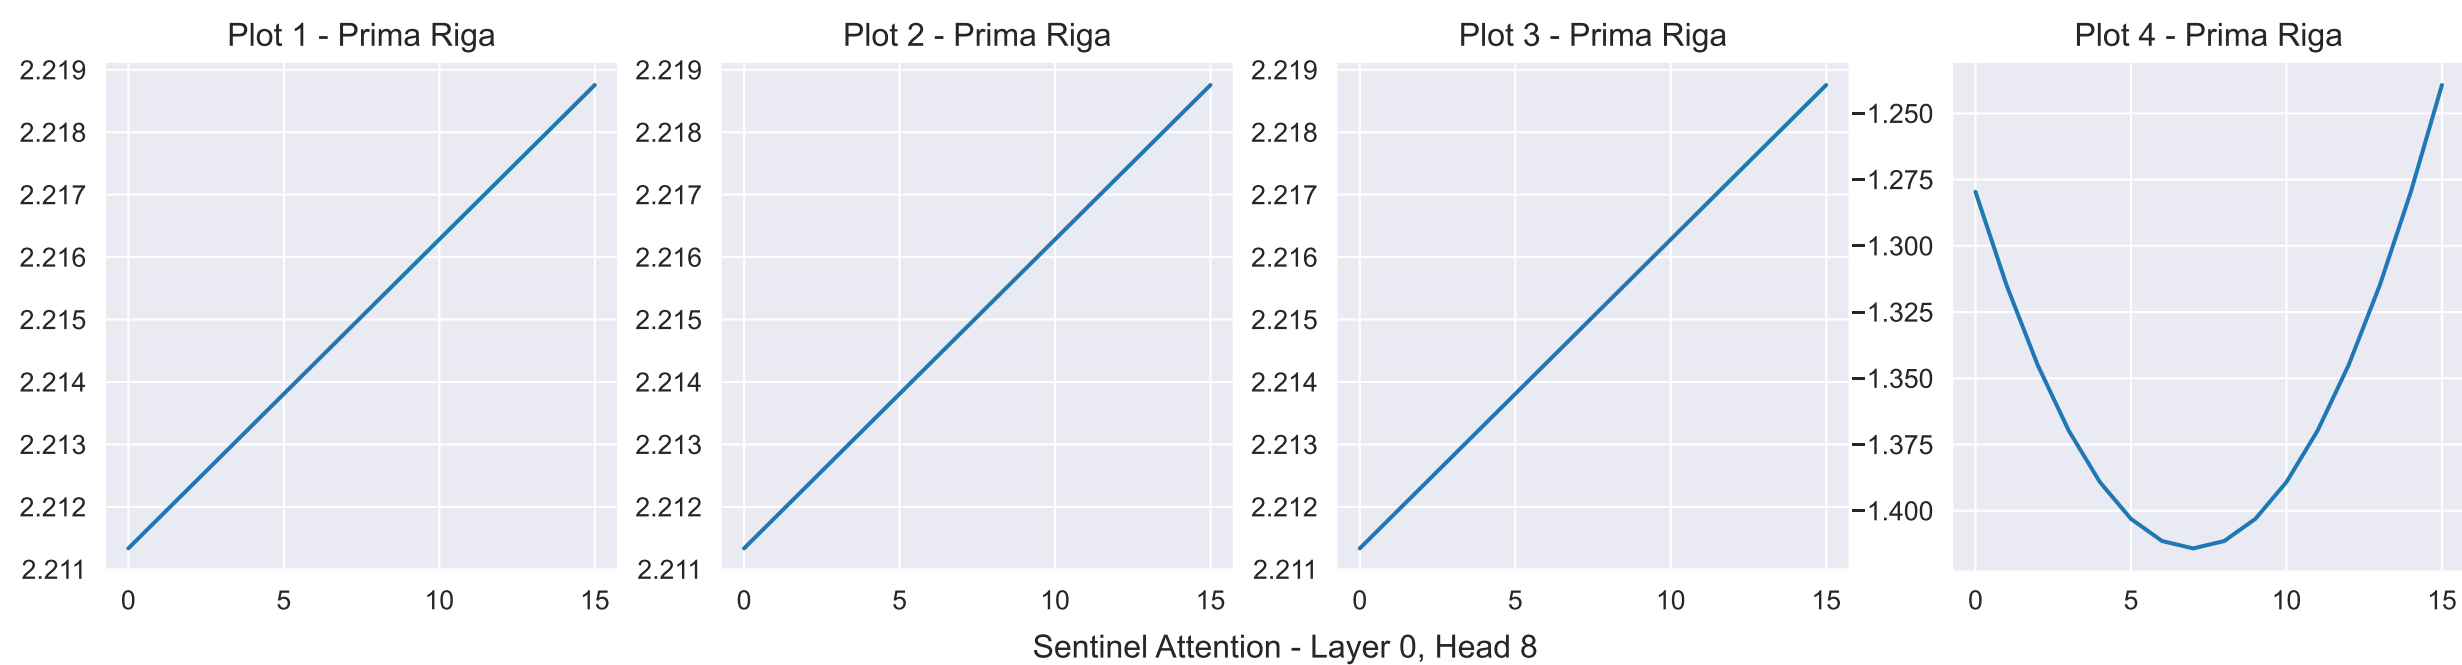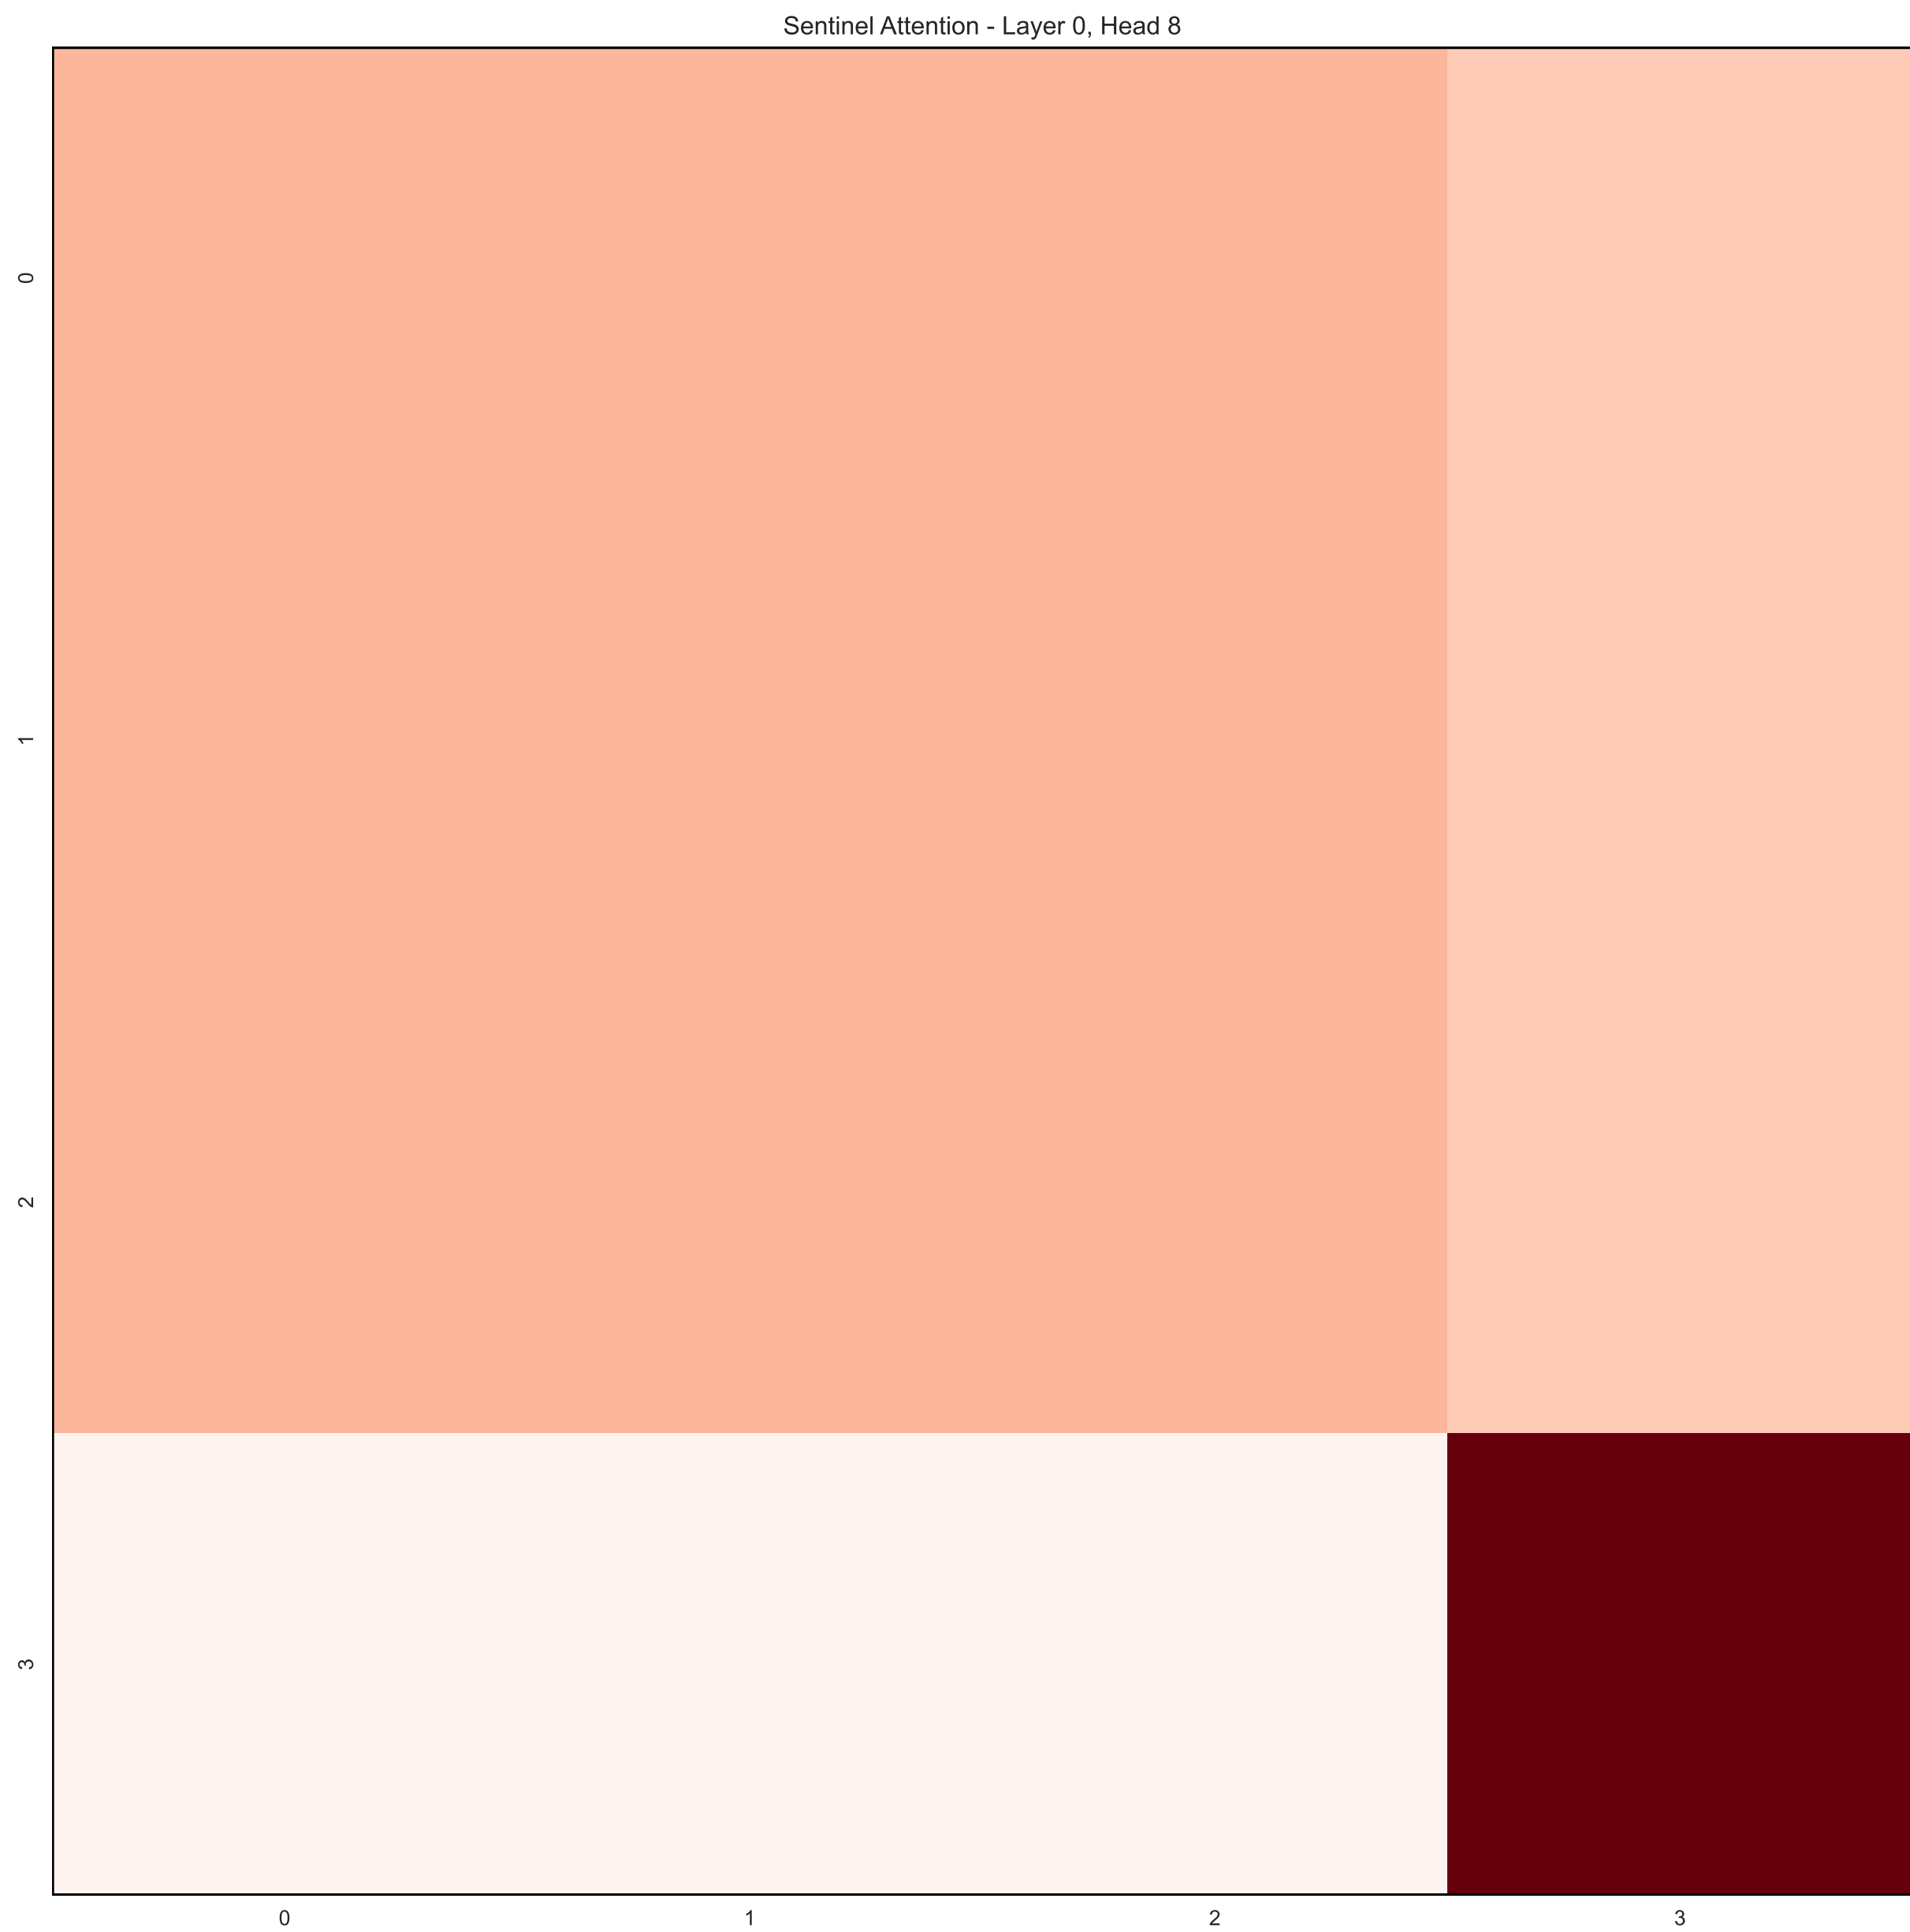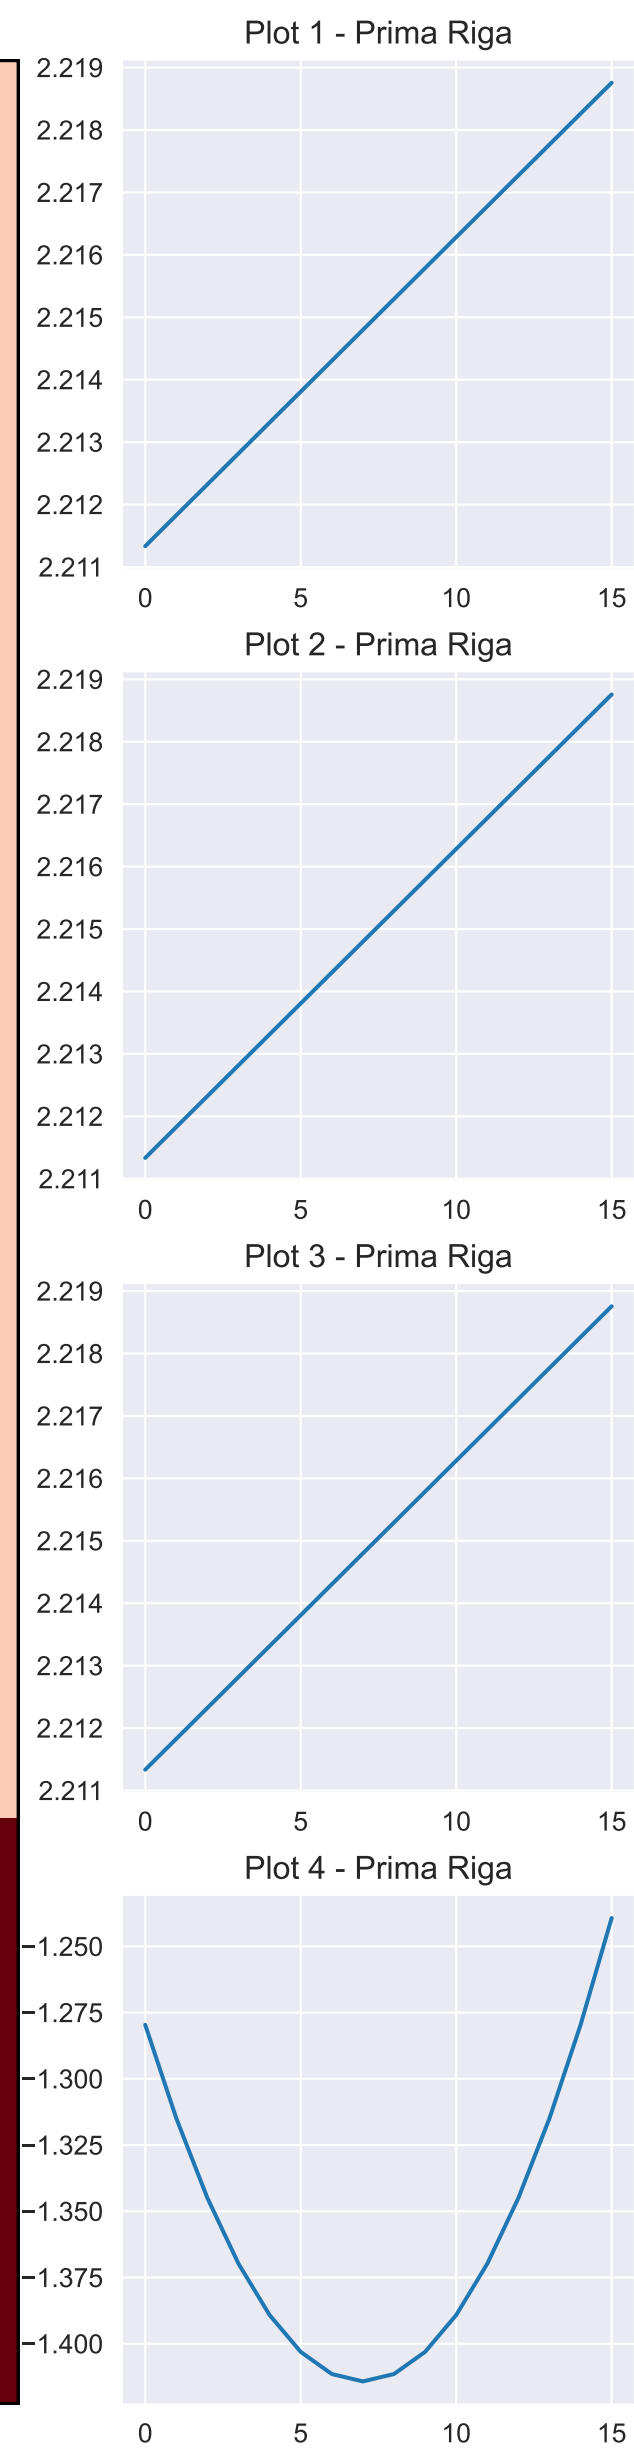

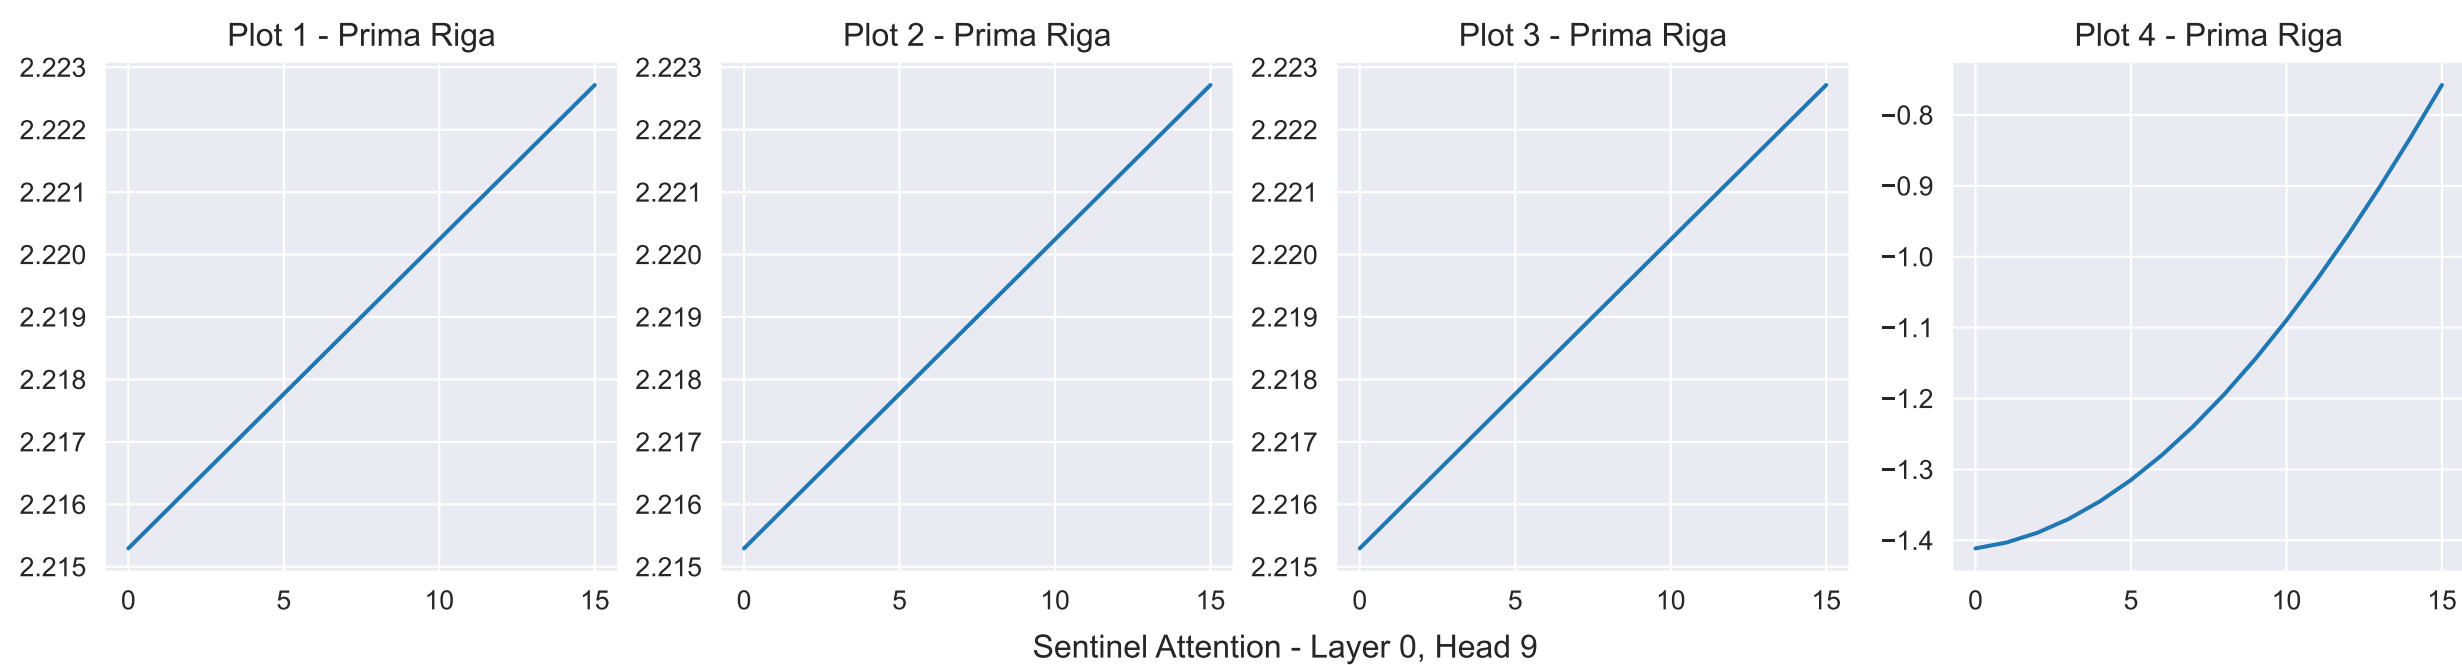

Sentinel Attention - Layer 0, Head 9

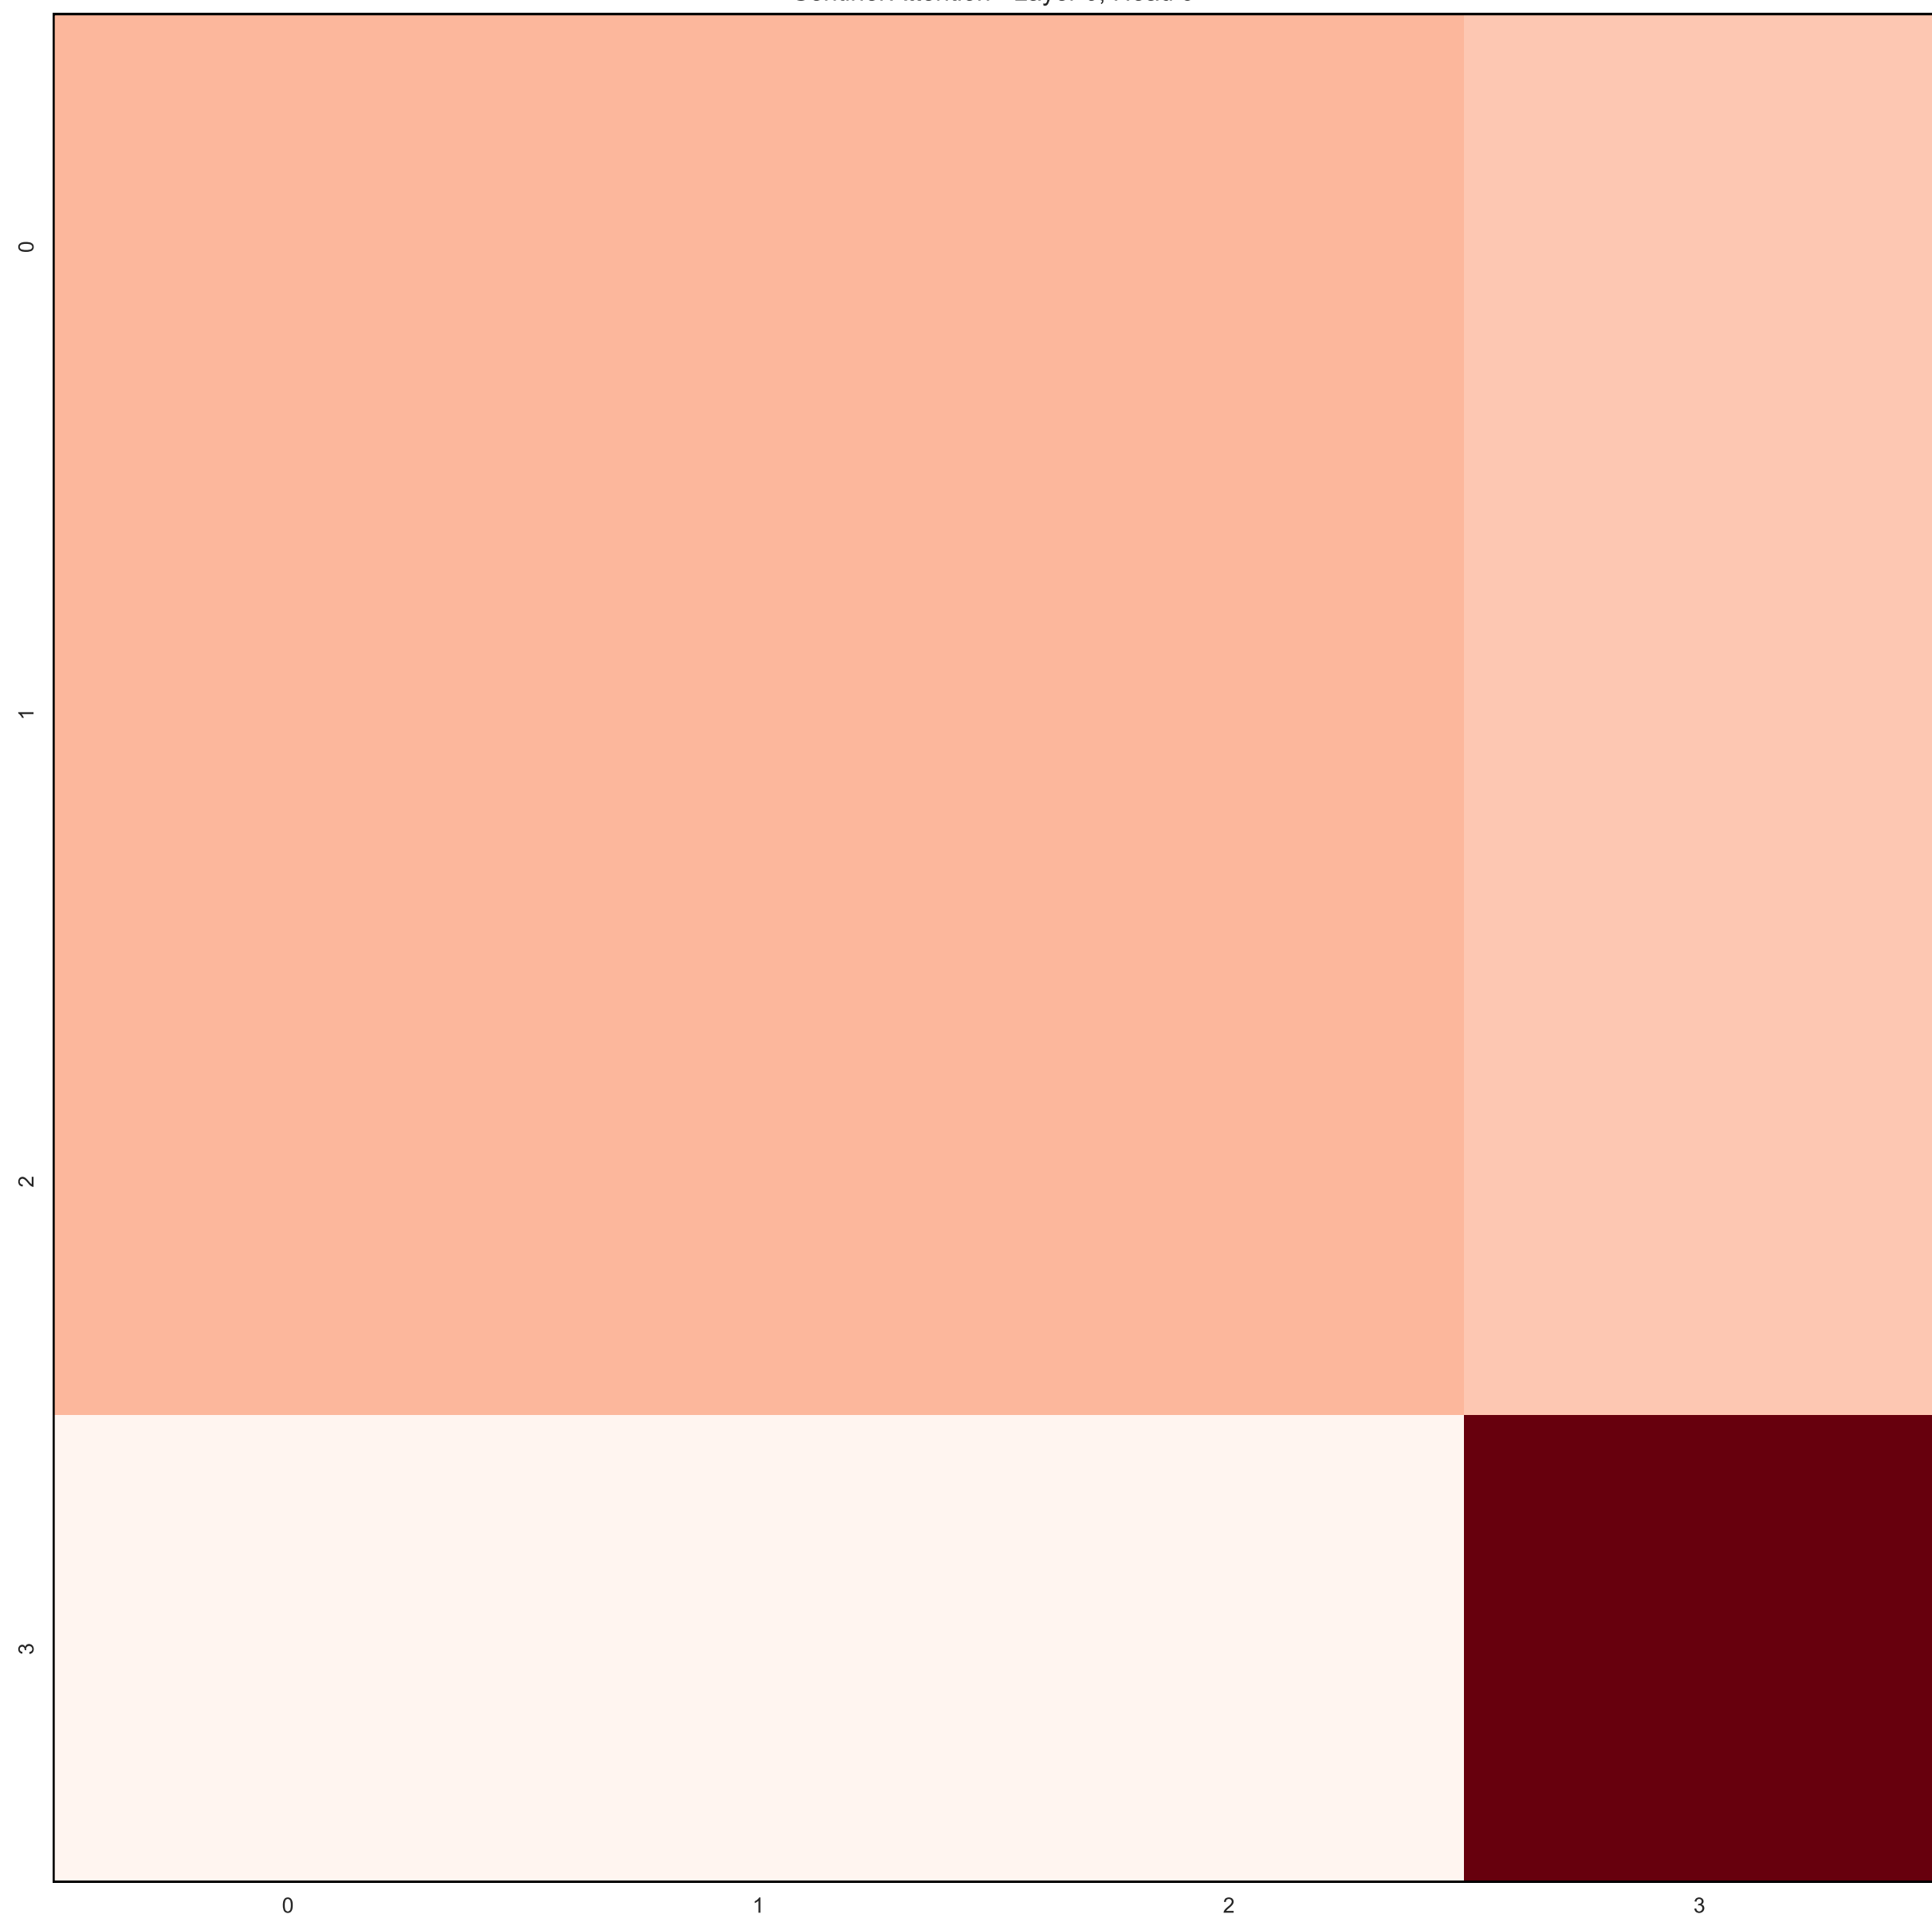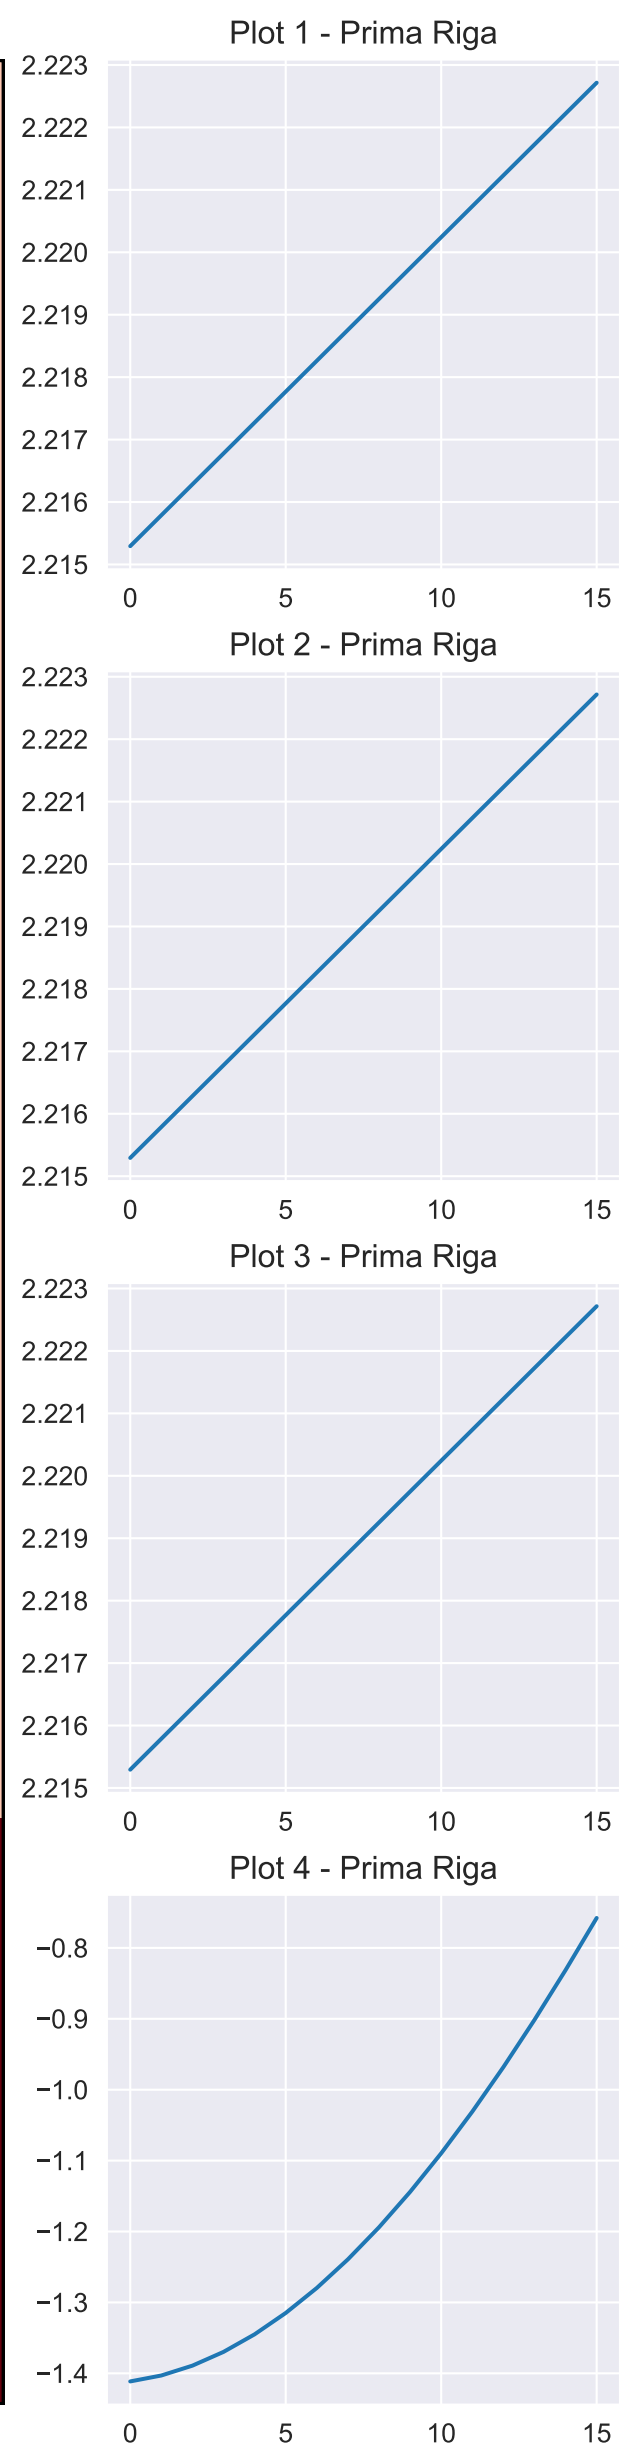

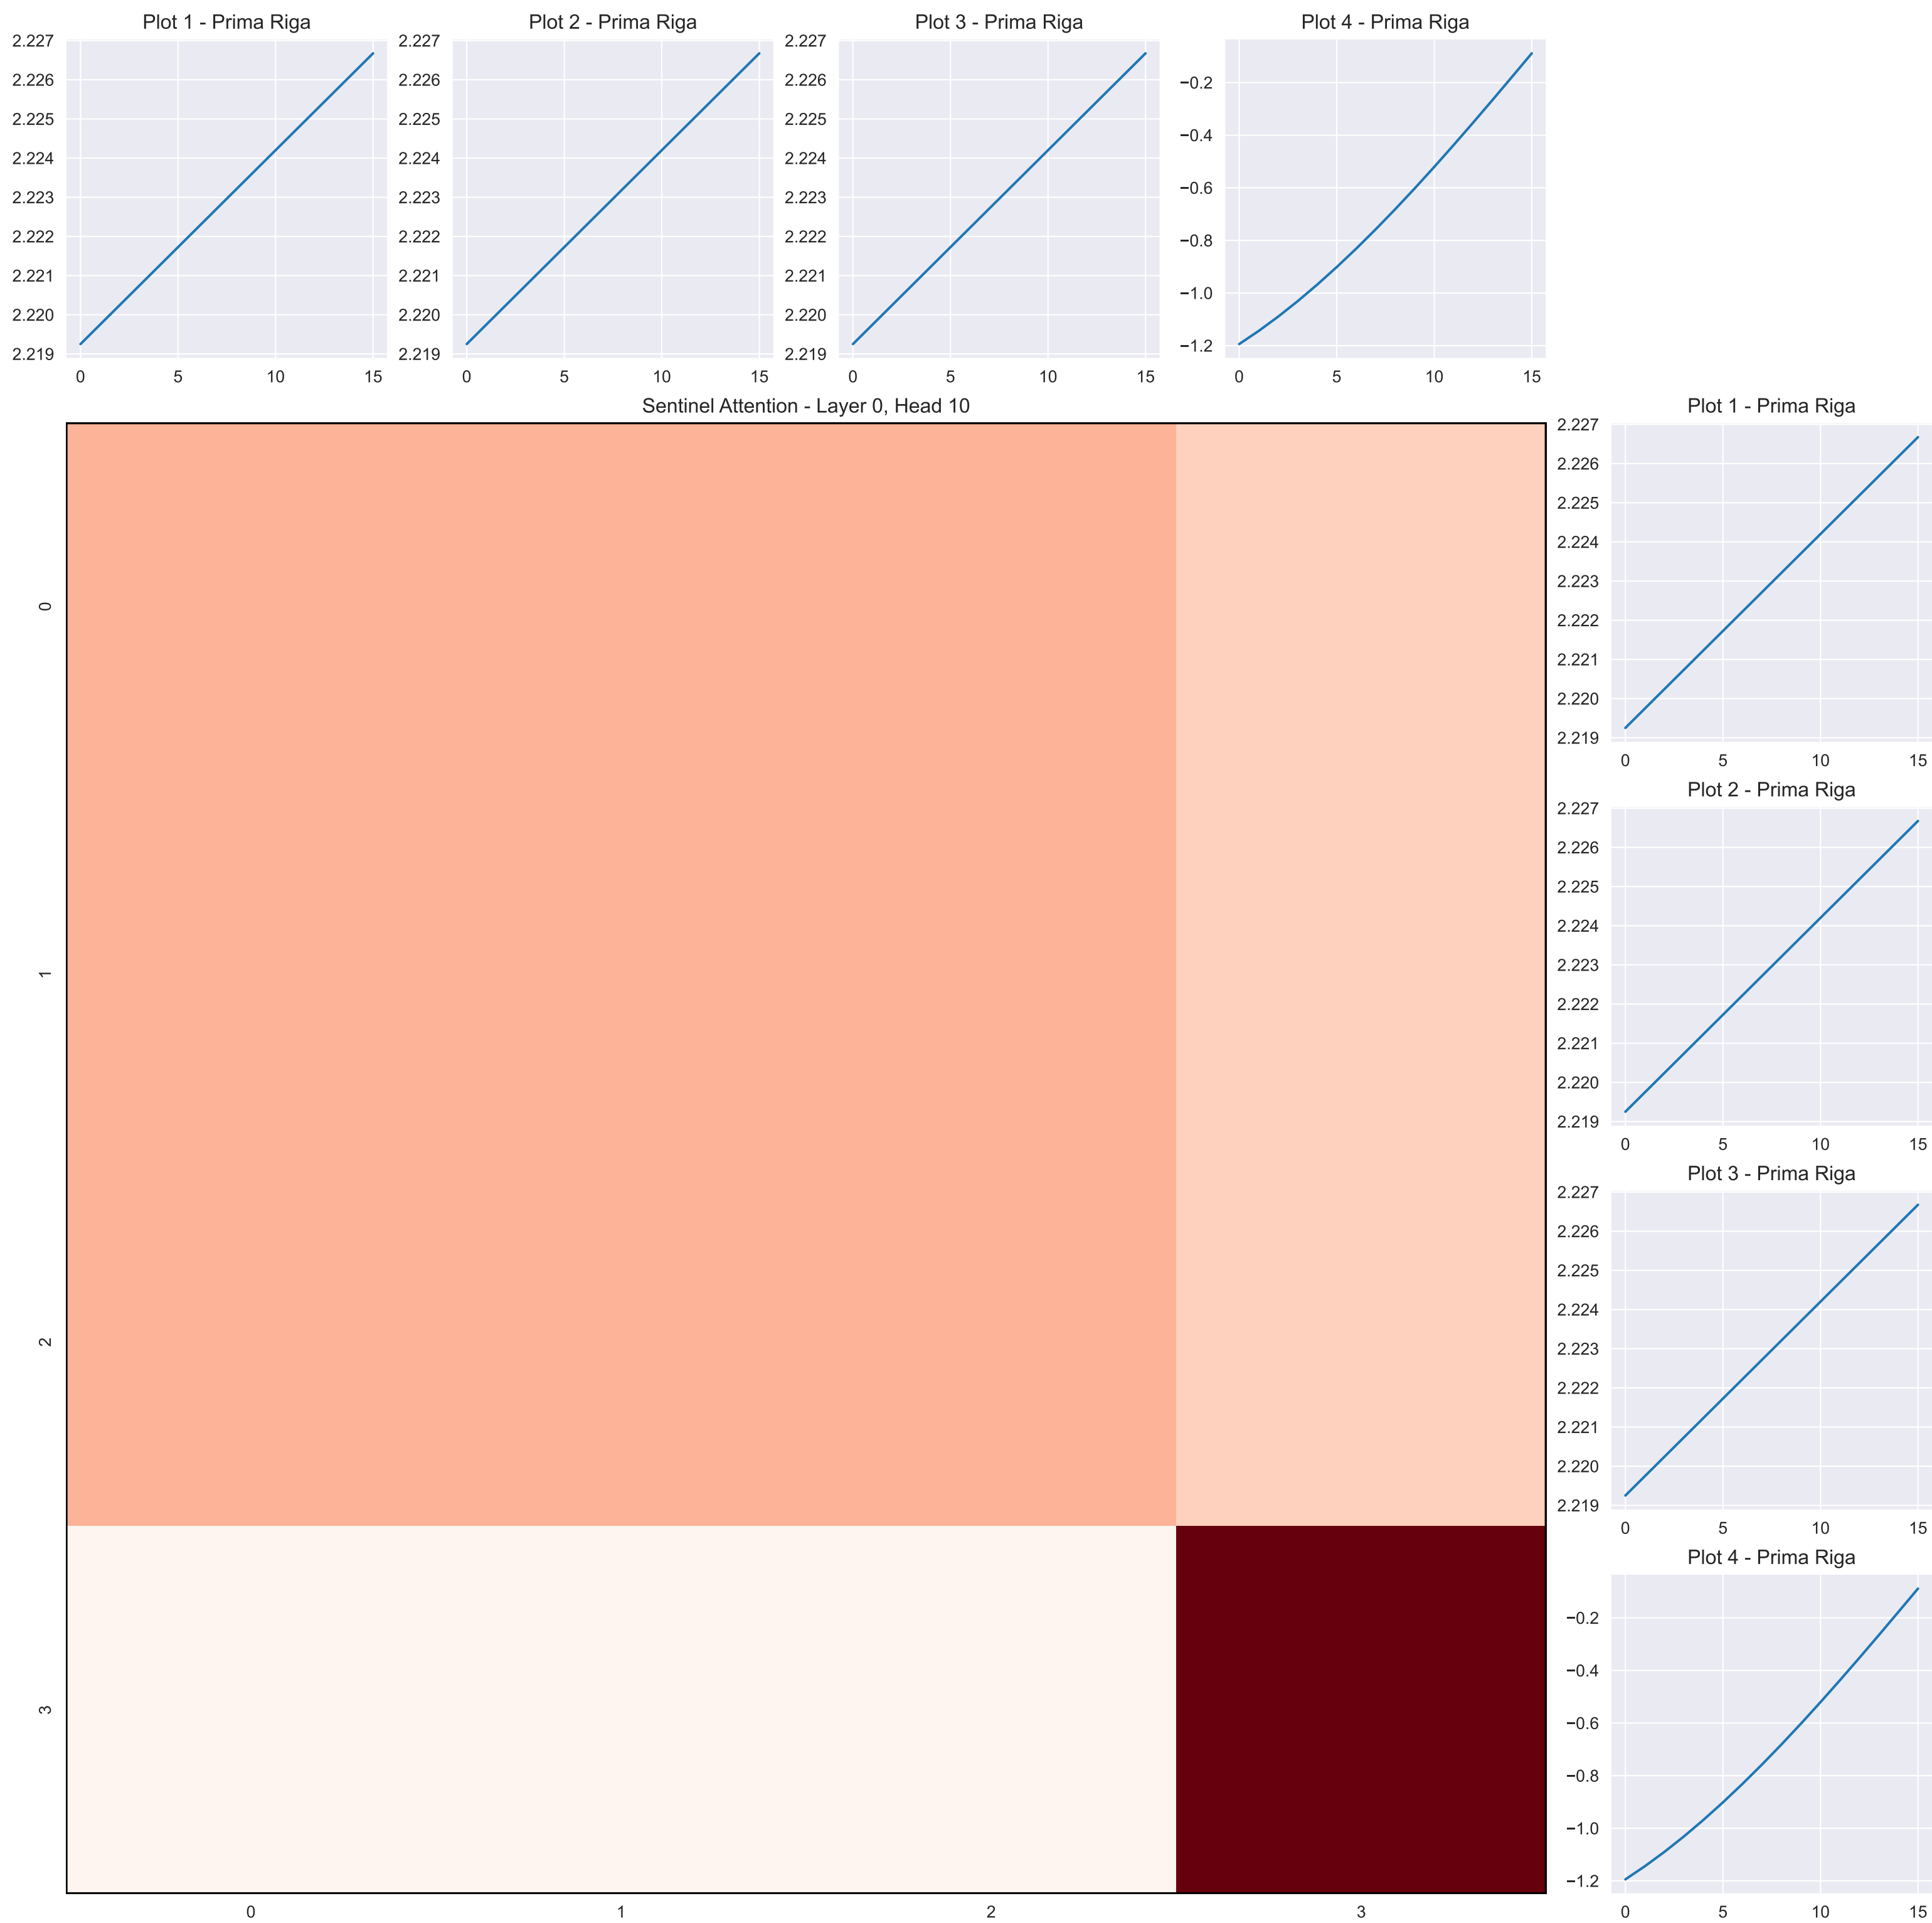

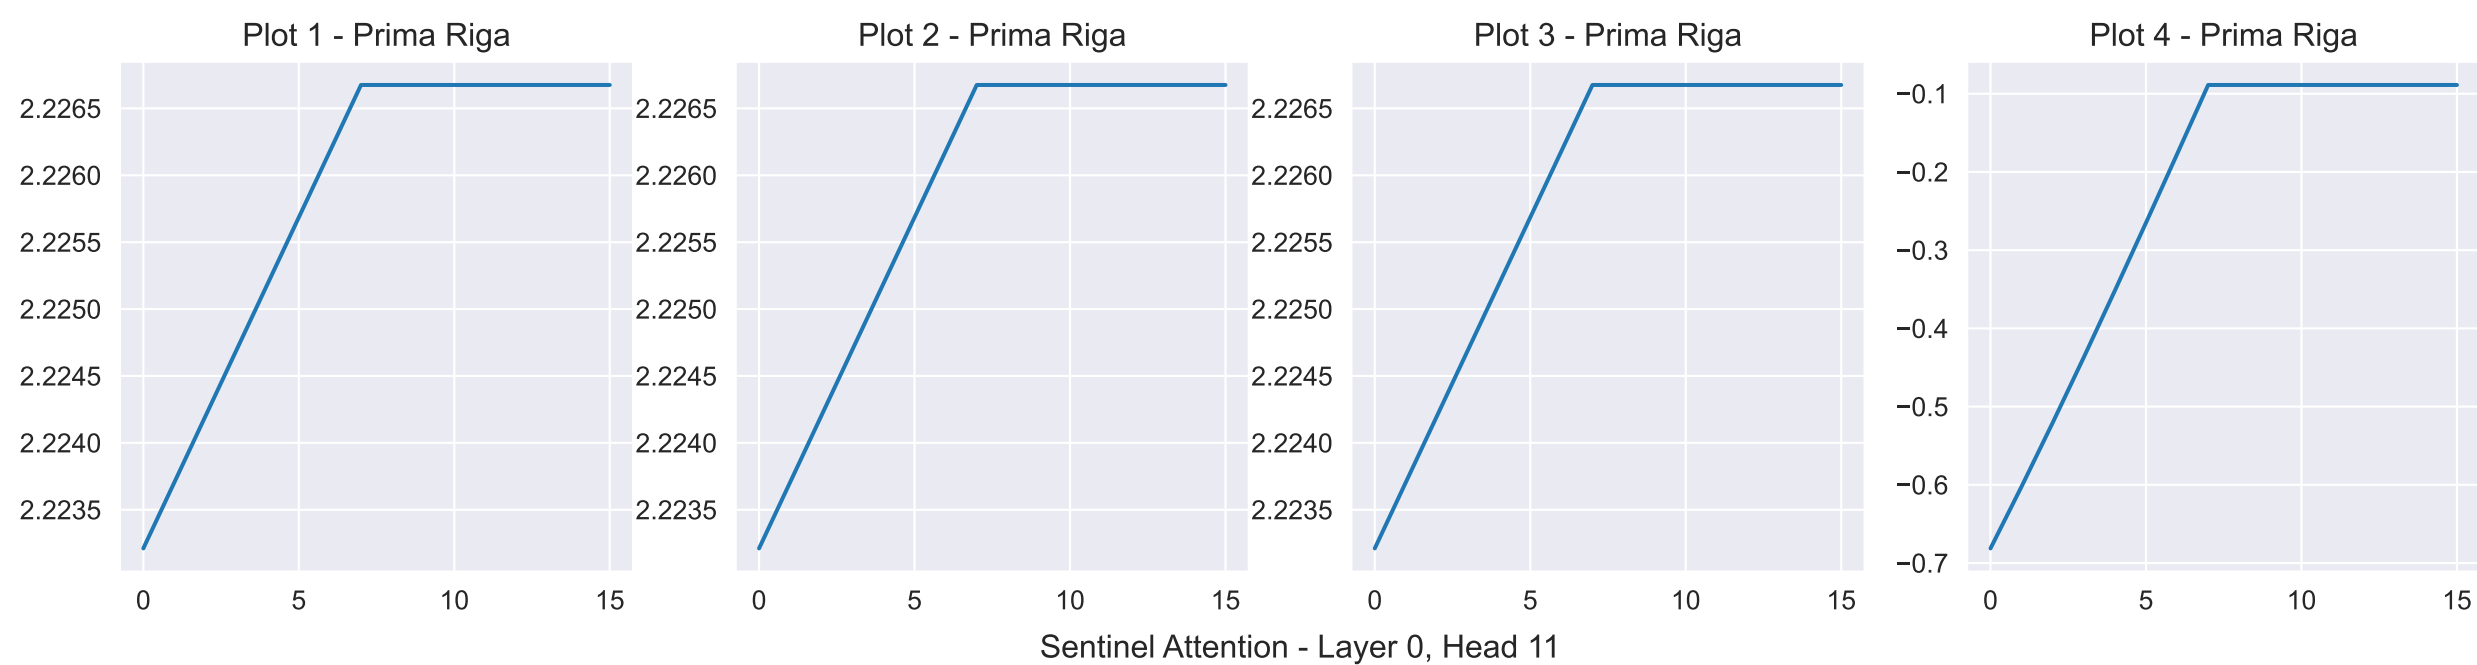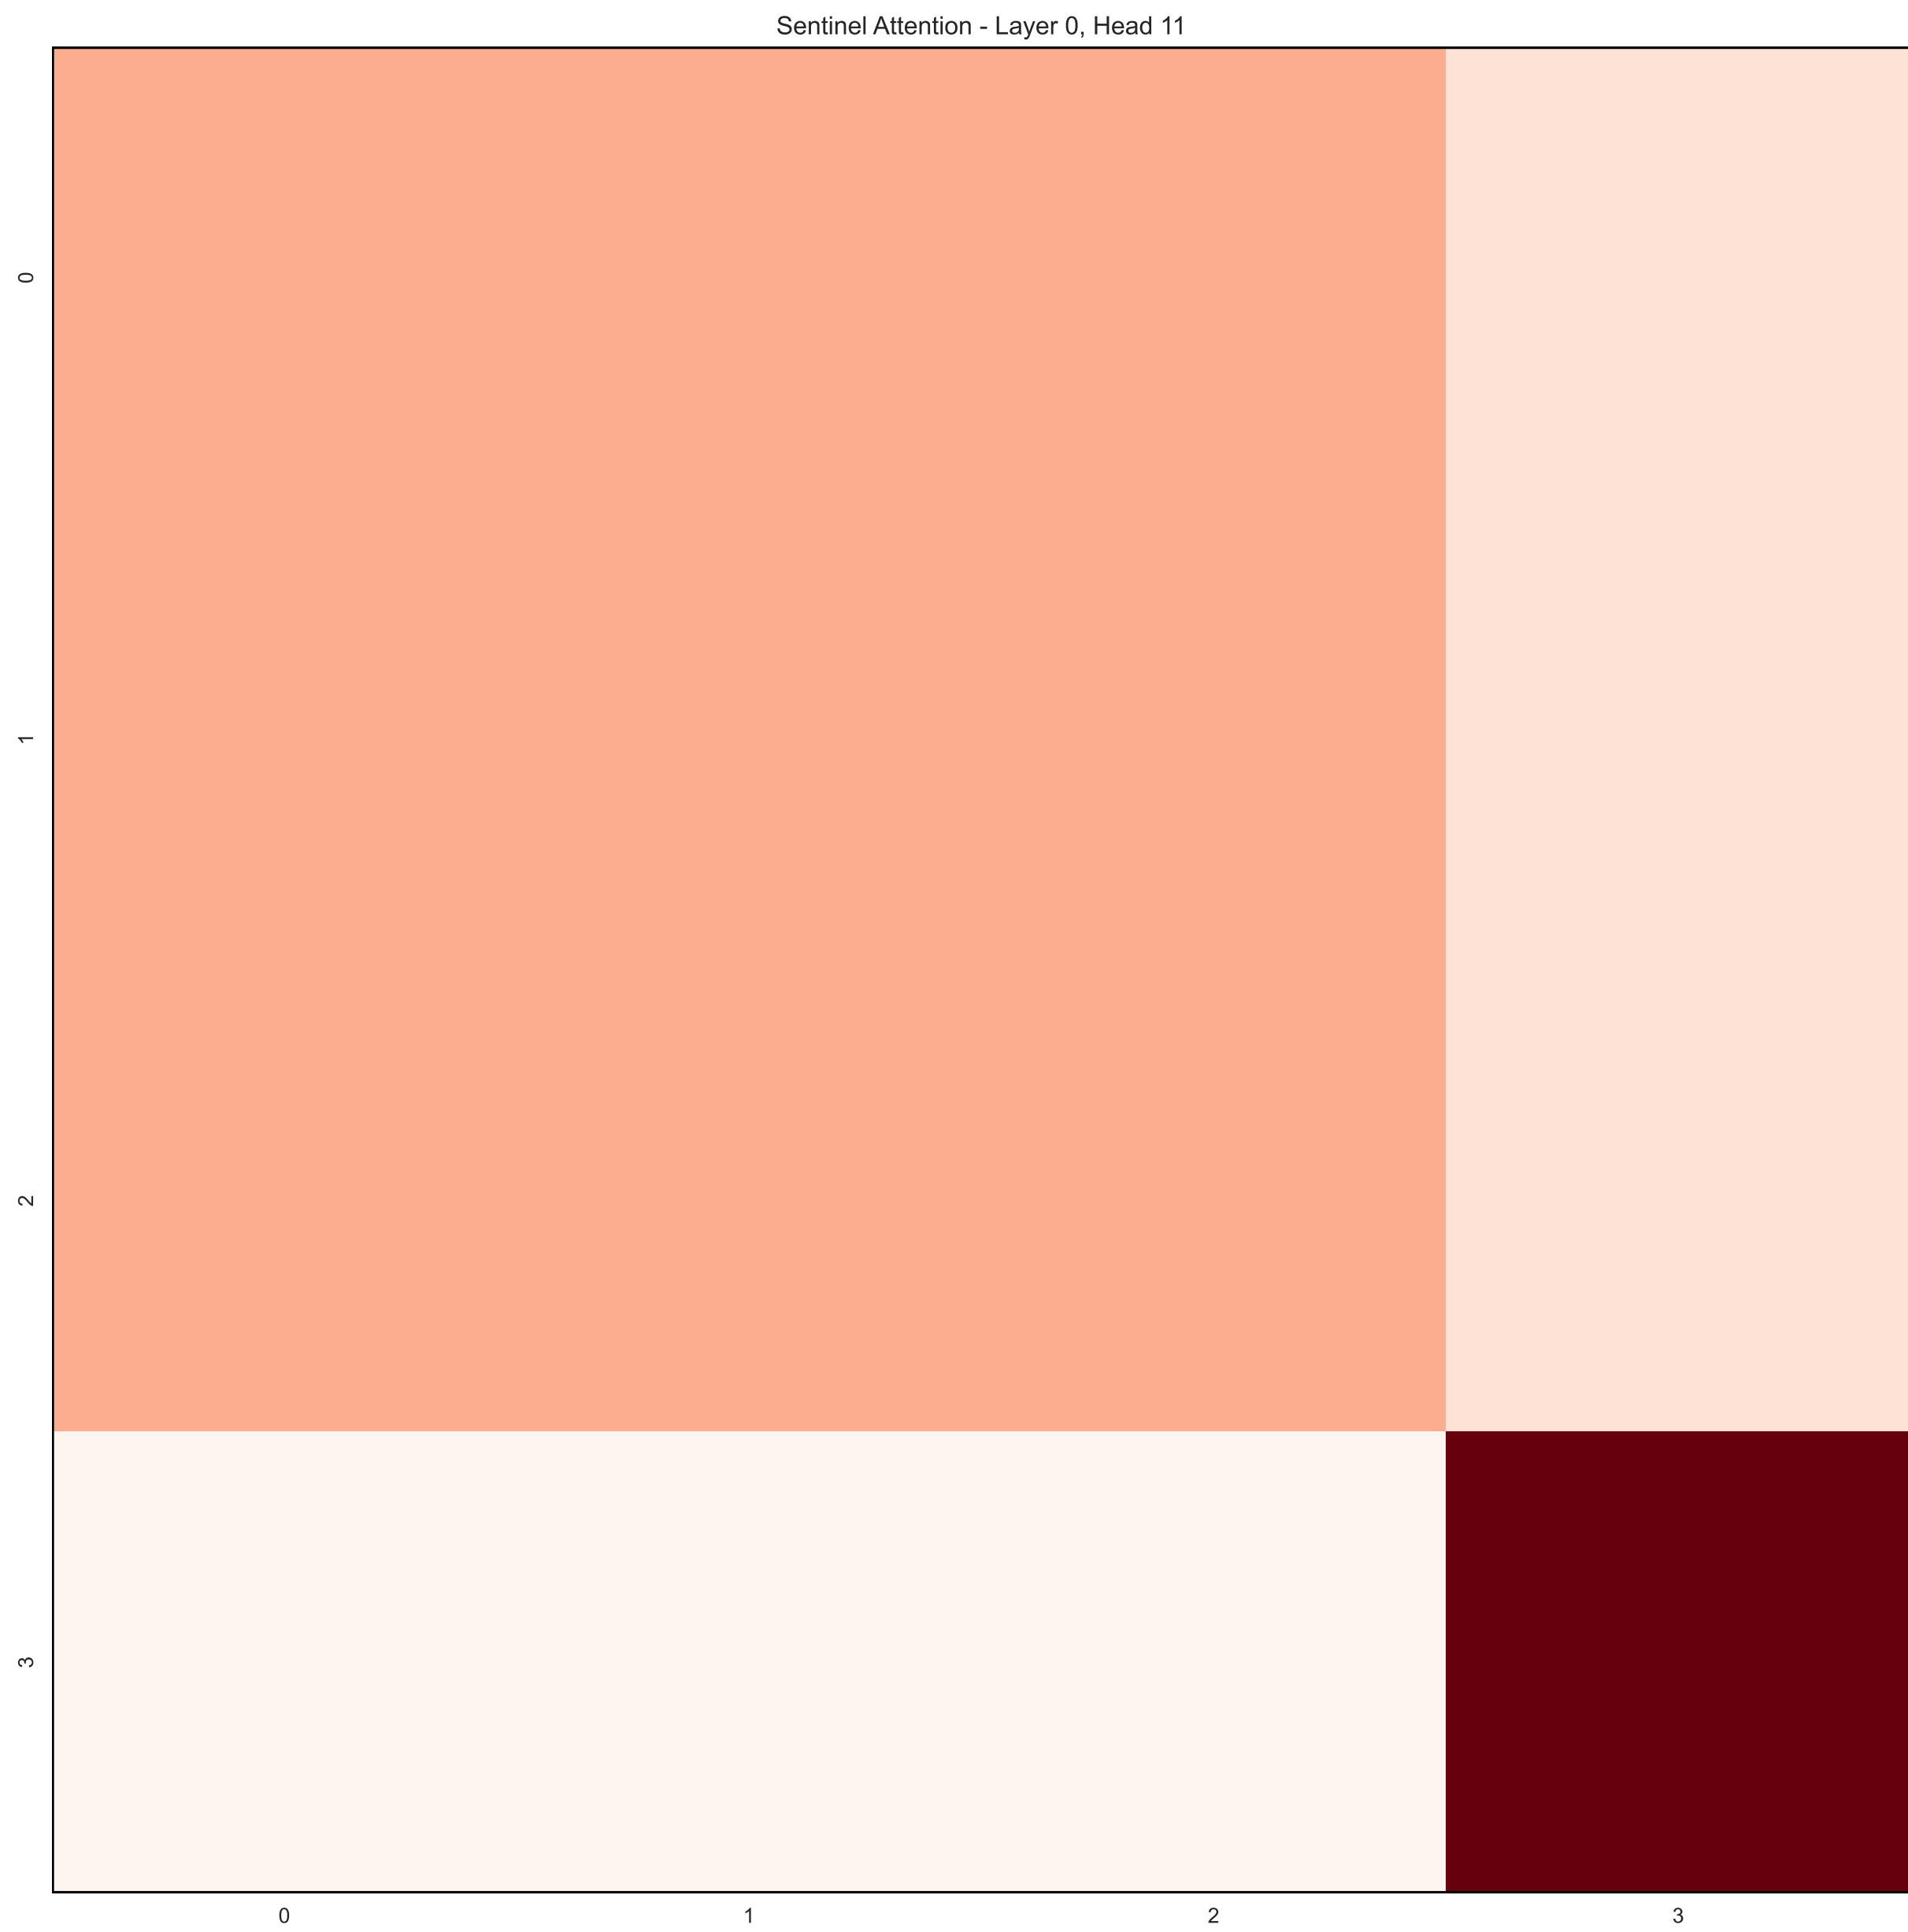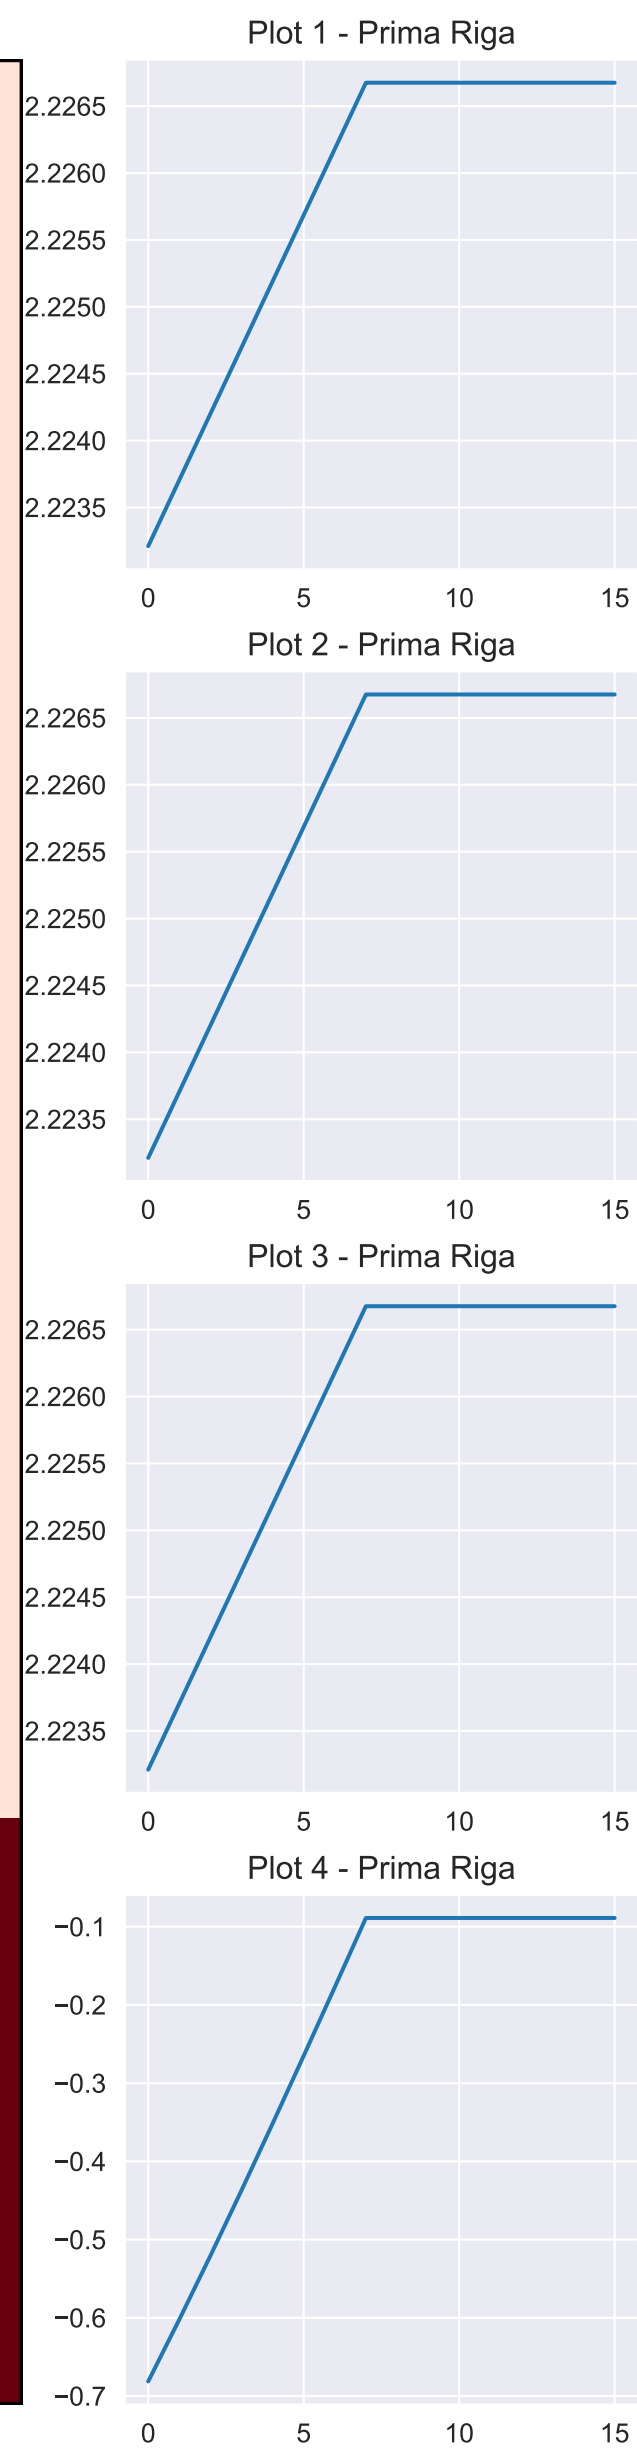

Supplement: supplementary_material [file attachment]
